# Supplementary material for: Population genomic data reveal genes related to important traits of quail
Source: PubMed Central journal article supplement (PMC5961004; doi:10.1093/gigascience/giy049), 2018-05-11

|                                                      |                                                                                                                                                                                                                                                                                                                                                                                                                                                                                                                                                                                                                                                                                                                                                                                                                                                                                                                                                                                                                                                                                                                                                                                                                                                                                                                                                                                                                                                                                                                                                                                                                                                                                                                                                                                                                                                                                                                                                                                                                                                                                                                                                                                                                                 |               |
|------------------------------------------------------|---------------------------------------------------------------------------------------------------------------------------------------------------------------------------------------------------------------------------------------------------------------------------------------------------------------------------------------------------------------------------------------------------------------------------------------------------------------------------------------------------------------------------------------------------------------------------------------------------------------------------------------------------------------------------------------------------------------------------------------------------------------------------------------------------------------------------------------------------------------------------------------------------------------------------------------------------------------------------------------------------------------------------------------------------------------------------------------------------------------------------------------------------------------------------------------------------------------------------------------------------------------------------------------------------------------------------------------------------------------------------------------------------------------------------------------------------------------------------------------------------------------------------------------------------------------------------------------------------------------------------------------------------------------------------------------------------------------------------------------------------------------------------------------------------------------------------------------------------------------------------------------------------------------------------------------------------------------------------------------------------------------------------------------------------------------------------------------------------------------------------------------------------------------------------------------------------------------------------------|---------------|
| <b>Manuscript Number:</b>                            | GIGA-D-17-00216                                                                                                                                                                                                                                                                                                                                                                                                                                                                                                                                                                                                                                                                                                                                                                                                                                                                                                                                                                                                                                                                                                                                                                                                                                                                                                                                                                                                                                                                                                                                                                                                                                                                                                                                                                                                                                                                                                                                                                                                                                                                                                                                                                                                                 |               |
| <b>Full Title:</b>                                   | Population genomic data reveal genes related to important traits of quail                                                                                                                                                                                                                                                                                                                                                                                                                                                                                                                                                                                                                                                                                                                                                                                                                                                                                                                                                                                                                                                                                                                                                                                                                                                                                                                                                                                                                                                                                                                                                                                                                                                                                                                                                                                                                                                                                                                                                                                                                                                                                                                                                       |               |
| <b>Article Type:</b>                                 | Research                                                                                                                                                                                                                                                                                                                                                                                                                                                                                                                                                                                                                                                                                                                                                                                                                                                                                                                                                                                                                                                                                                                                                                                                                                                                                                                                                                                                                                                                                                                                                                                                                                                                                                                                                                                                                                                                                                                                                                                                                                                                                                                                                                                                                        |               |
| <b>Funding Information:</b>                          | Study and application of functional genes in quail precocious traits based on whole genome analysis (2012tsxk09)                                                                                                                                                                                                                                                                                                                                                                                                                                                                                                                                                                                                                                                                                                                                                                                                                                                                                                                                                                                                                                                                                                                                                                                                                                                                                                                                                                                                                                                                                                                                                                                                                                                                                                                                                                                                                                                                                                                                                                                                                                                                                                                | Dr Jinping Du |
|                                                      | Molecular breeding of poultry (2014-2017 ZD146)                                                                                                                                                                                                                                                                                                                                                                                                                                                                                                                                                                                                                                                                                                                                                                                                                                                                                                                                                                                                                                                                                                                                                                                                                                                                                                                                                                                                                                                                                                                                                                                                                                                                                                                                                                                                                                                                                                                                                                                                                                                                                                                                                                                 | Dr Yan Wu     |
| <b>Abstract:</b>                                     | <p><b>Abstract</b></p> <p><b>Background:</b> Japanese quail (<i>Coturnix japonica</i>), a recently domesticated poultry species, is important not only as an agricultural product, but also as a model bird species for genetic research. However, most of the biological questions, genomics, phylogenetics and genetics of some important economic traits, are not solved. In view of this, it is necessary to complete a high-quality genome sequence as well as series of comparative genomics, evolution and functional studies.</p> <p><b>Result:</b> Here we present a quail genome assembly spanning 1.04Gb with 86.63% of sequences anchored to 30 chromosomes (28 autosomes and two sex chromosomes Z/W). Our genomic data solved the long-term debate of phylogeny among <i>Perdixinae</i> (Japanese quail), <i>Meleagridinae</i> (turkey) and <i>Phasianinae</i> (chicken). Comparative genomics and functional genomic data found that four candidate genes involved in early-maturation had experienced positive selection, and one of them encodes follicle stimulating hormone beta (FSH<math>\beta</math>), which is correlated with different FSH<math>\beta</math> levels in quail and chicken. We re-sequenced 31 quails (10 wild, 11 egg-type and 10 meat-type) and identified 11 and 26 candidate selective sweep regions in egg-type and meat-type lines, respectively. That only one of them shared between egg-type and meat-type lines suggested that they were subject to an independent selection. We also detected a haplotype on chromosome Z which was closely linked with marron/yellow plumage in quail using population resequencing and genome-wide association study. This haplotype block would be useful for quail breeding program.</p> <p><b>Conclusions:</b> This study provided a high-quality quail reference genome, identified quail specific genes and solved quail phylogeny. We have identified genes related to quail's early-maturation and a marker for plumage color which is significant for quail breeding. The present results will facilitate biological discovery in quail and help us to elucidate the evolutionary process within the <i>Phasianidae</i> family.</p> |               |
| <b>Corresponding Author:</b>                         | Xin Liu, Ph.D.<br>BGI<br>CHINA                                                                                                                                                                                                                                                                                                                                                                                                                                                                                                                                                                                                                                                                                                                                                                                                                                                                                                                                                                                                                                                                                                                                                                                                                                                                                                                                                                                                                                                                                                                                                                                                                                                                                                                                                                                                                                                                                                                                                                                                                                                                                                                                                                                                  |               |
| <b>Corresponding Author Secondary Information:</b>   |                                                                                                                                                                                                                                                                                                                                                                                                                                                                                                                                                                                                                                                                                                                                                                                                                                                                                                                                                                                                                                                                                                                                                                                                                                                                                                                                                                                                                                                                                                                                                                                                                                                                                                                                                                                                                                                                                                                                                                                                                                                                                                                                                                                                                                 |               |
| <b>Corresponding Author's Institution:</b>           | BGI                                                                                                                                                                                                                                                                                                                                                                                                                                                                                                                                                                                                                                                                                                                                                                                                                                                                                                                                                                                                                                                                                                                                                                                                                                                                                                                                                                                                                                                                                                                                                                                                                                                                                                                                                                                                                                                                                                                                                                                                                                                                                                                                                                                                                             |               |
| <b>Corresponding Author's Secondary Institution:</b> |                                                                                                                                                                                                                                                                                                                                                                                                                                                                                                                                                                                                                                                                                                                                                                                                                                                                                                                                                                                                                                                                                                                                                                                                                                                                                                                                                                                                                                                                                                                                                                                                                                                                                                                                                                                                                                                                                                                                                                                                                                                                                                                                                                                                                                 |               |
| <b>First Author:</b>                                 | Yan Wu                                                                                                                                                                                                                                                                                                                                                                                                                                                                                                                                                                                                                                                                                                                                                                                                                                                                                                                                                                                                                                                                                                                                                                                                                                                                                                                                                                                                                                                                                                                                                                                                                                                                                                                                                                                                                                                                                                                                                                                                                                                                                                                                                                                                                          |               |
| <b>First Author Secondary Information:</b>           |                                                                                                                                                                                                                                                                                                                                                                                                                                                                                                                                                                                                                                                                                                                                                                                                                                                                                                                                                                                                                                                                                                                                                                                                                                                                                                                                                                                                                                                                                                                                                                                                                                                                                                                                                                                                                                                                                                                                                                                                                                                                                                                                                                                                                                 |               |
| <b>Order of Authors:</b>                             | Yan Wu                                                                                                                                                                                                                                                                                                                                                                                                                                                                                                                                                                                                                                                                                                                                                                                                                                                                                                                                                                                                                                                                                                                                                                                                                                                                                                                                                                                                                                                                                                                                                                                                                                                                                                                                                                                                                                                                                                                                                                                                                                                                                                                                                                                                                          |               |
|                                                      | Yaolei Zhang                                                                                                                                                                                                                                                                                                                                                                                                                                                                                                                                                                                                                                                                                                                                                                                                                                                                                                                                                                                                                                                                                                                                                                                                                                                                                                                                                                                                                                                                                                                                                                                                                                                                                                                                                                                                                                                                                                                                                                                                                                                                                                                                                                                                                    |               |
|                                                      | Jinsong Pi                                                                                                                                                                                                                                                                                                                                                                                                                                                                                                                                                                                                                                                                                                                                                                                                                                                                                                                                                                                                                                                                                                                                                                                                                                                                                                                                                                                                                                                                                                                                                                                                                                                                                                                                                                                                                                                                                                                                                                                                                                                                                                                                                                                                                      |               |
|                                                      | Jiang Chen                                                                                                                                                                                                                                                                                                                                                                                                                                                                                                                                                                                                                                                                                                                                                                                                                                                                                                                                                                                                                                                                                                                                                                                                                                                                                                                                                                                                                                                                                                                                                                                                                                                                                                                                                                                                                                                                                                                                                                                                                                                                                                                                                                                                                      |               |
|                                                      | Guangyi Fan                                                                                                                                                                                                                                                                                                                                                                                                                                                                                                                                                                                                                                                                                                                                                                                                                                                                                                                                                                                                                                                                                                                                                                                                                                                                                                                                                                                                                                                                                                                                                                                                                                                                                                                                                                                                                                                                                                                                                                                                                                                                                                                                                                                                                     |               |

|                                                |                                                                                                                                                                   |
|------------------------------------------------|-------------------------------------------------------------------------------------------------------------------------------------------------------------------|
|                                                | Huaqiao Liu                                                                                                                                                       |
|                                                | Jie Shen                                                                                                                                                          |
|                                                | Wenbin Chen                                                                                                                                                       |
|                                                | Ailuan Pan                                                                                                                                                        |
|                                                | Xiaoli Chen                                                                                                                                                       |
|                                                | Yuejin Pu                                                                                                                                                         |
|                                                | He Zhang                                                                                                                                                          |
|                                                | Zenhua Liang                                                                                                                                                      |
|                                                | jianbo Jian                                                                                                                                                       |
|                                                | Hao Zhang                                                                                                                                                         |
|                                                | Bin Wu                                                                                                                                                            |
|                                                | Jing Sun                                                                                                                                                          |
|                                                | Jianwei Chen                                                                                                                                                      |
|                                                | Hu Tao                                                                                                                                                            |
|                                                | Ting Yang                                                                                                                                                         |
|                                                | Hongwei Xiao                                                                                                                                                      |
|                                                | Huan Yang                                                                                                                                                         |
|                                                | Chuanwei Zheng                                                                                                                                                    |
|                                                | Mingzhou Bai                                                                                                                                                      |
|                                                | Xiaodong Fang                                                                                                                                                     |
|                                                | David W. Burt                                                                                                                                                     |
|                                                | Wen Wang                                                                                                                                                          |
|                                                | Qingyi Li                                                                                                                                                         |
|                                                | Xun Xu                                                                                                                                                            |
|                                                | Chengfeng Li                                                                                                                                                      |
|                                                | Huanming Yang                                                                                                                                                     |
|                                                | Jian Wang                                                                                                                                                         |
|                                                | Zhuocheng Hou                                                                                                                                                     |
|                                                | Ning Yang                                                                                                                                                         |
|                                                | Xin Liu, Ph.D.                                                                                                                                                    |
|                                                | Jinping Du                                                                                                                                                        |
| <b>Order of Authors Secondary Information:</b> |                                                                                                                                                                   |
| <b>Opposed Reviewers:</b>                      | Yoichi Matsuda<br>Laboratory of animal genetics, Graduate school of Bioagricultural sciences, Nagoya University, Furo-cho, Chikusa-ku, Nagoya 464-8601, Japan     |
|                                                | Tomohiro Kono<br>Genome Research Center, NODAI Research Institute, Tokyo University of Agriculture, 1-1-1 Sakuragaoka, Setagaya-ku, Tokyo 156-8502, Japan         |
|                                                | Ryouka Kawahara-Miki<br>Genome Research Center, NODAI Research Institute, Tokyo University of Agriculture, 1-1-1, Sakuragaoka, Setagaya-ku, Tokyo 156-8502, Japan |



|                                                                                                                                                                                                                                                                                                                                                                                                                                                                                                                                                         |                                                                                        |
|---------------------------------------------------------------------------------------------------------------------------------------------------------------------------------------------------------------------------------------------------------------------------------------------------------------------------------------------------------------------------------------------------------------------------------------------------------------------------------------------------------------------------------------------------------|----------------------------------------------------------------------------------------|
|                                                                                                                                                                                                                                                                                                                                                                                                                                                                                                                                                         | Wesley Warren<br>McDonnell Genome Institute - Washington University School of Medicine |
| <b>Additional Information:</b>                                                                                                                                                                                                                                                                                                                                                                                                                                                                                                                          |                                                                                        |
| <b>Question</b>                                                                                                                                                                                                                                                                                                                                                                                                                                                                                                                                         | <b>Response</b>                                                                        |
| Are you submitting this manuscript to a special series or article collection?                                                                                                                                                                                                                                                                                                                                                                                                                                                                           | No                                                                                     |
| <p><b>Experimental design and statistics</b></p> <p>Full details of the experimental design and statistical methods used should be given in the Methods section, as detailed in our <a href="#">Minimum Standards Reporting Checklist</a>. Information essential to interpreting the data presented should be made available in the figure legends.</p> <p>Have you included all the information requested in your manuscript?</p>                                                                                                                      | Yes                                                                                    |
| <p><b>Resources</b></p> <p>A description of all resources used, including antibodies, cell lines, animals and software tools, with enough information to allow them to be uniquely identified, should be included in the Methods section. Authors are strongly encouraged to cite <a href="#">Research Resource Identifiers</a> (RRIDs) for antibodies, model organisms and tools, where possible.</p> <p>Have you included the information requested as detailed in our <a href="#">Minimum Standards Reporting Checklist</a>?</p>                     | Yes                                                                                    |
| <p><b>Availability of data and materials</b></p> <p>All datasets and code on which the conclusions of the paper rely must be either included in your submission or deposited in <a href="#">publicly available repositories</a> (where available and ethically appropriate), referencing such data using a unique identifier in the references and in the “Availability of Data and Materials” section of your manuscript.</p> <p>Have you have met the above requirement as detailed in our <a href="#">Minimum Standards Reporting Checklist</a>?</p> | Yes                                                                                    |

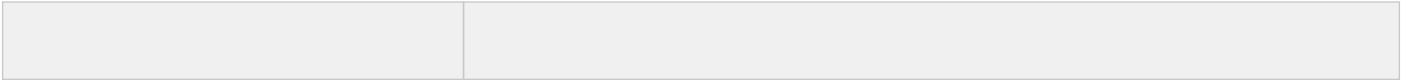

## Population genomic data reveal genes related to important traits of quail

1  
2  
3  
4  
5  
6  
7  
8  
9  
10  
11  
12  
13  
14  
15  
16  
17  
18  
19  
20  
21  
22  
23  
24  
25  
26  
27  
28  
29  
30  
31  
32  
33  
34  
35  
36  
37  
38  
39  
40  
41  
42  
43  
44  
45  
46  
47  
48  
49  
50  
51  
52  
53  
54  
55  
56  
57  
58  
59  
60  
61  
62  
63  
64  
65

3 Yan Wu<sup>1,3,\*</sup>, Yaolei Zhang<sup>2,6,10,\*</sup>, Jinsong Pi<sup>1,\*</sup>, Jiang Chen<sup>2,10,\*</sup>, Guangyi Fan<sup>2,7,10,\*</sup>,  
4 Huaqiao Liu<sup>5,\*</sup>, Jie Shen<sup>1</sup>, Wenbin Chen<sup>2</sup>, Ailuan Pan<sup>1</sup>, Xiaoli Chen<sup>2</sup>, Yuejin Pu<sup>1</sup>, He  
5 Zhang<sup>2</sup>, Zhenhua Liang<sup>1</sup>, Jianbo Jian<sup>2</sup>, Hao Zhang<sup>1</sup>, Bin Wu<sup>2</sup>, Jing Sun<sup>1</sup>, Jianwei  
6 Chen<sup>2</sup>, Hu Tao<sup>1</sup>, Ting Yang<sup>2</sup>, Hongwei Xiao<sup>1</sup>, Huan Yang<sup>2</sup>, Chuanwei Zheng<sup>1</sup>,  
7 Mingzhou Bai<sup>2</sup>, Xiaodong Fang<sup>2</sup>, David W. Burt<sup>8</sup>, Wen Wang<sup>9</sup>, Qingyi Li<sup>5</sup>, Xun Xu<sup>2,10</sup>,  
8 Chengfeng Li<sup>5</sup>, Huanming Yang<sup>2,11</sup>, Jian Wang<sup>2,11</sup>, Zhuocheng Hou<sup>4,†</sup>, Ning Yang<sup>4,†</sup>,  
9 Xin Liu<sup>2,10,†</sup>, Jinping Du<sup>1,†</sup>

1      11    **Abstract**

2  
3      12    **Background:** Japanese quail (*Coturnix japonica*), a recently domesticated poultry  
4  
5  
6      13    species, is important not only as an agricultural product, but also as a model bird  
7  
8  
9      14    species for genetic research. However, most of the biological questions, genomics,  
10  
11  
12     15    phylogenetics and genetics of some important economic traits, are not solved. In view  
13  
14  
15     16    of this, it is necessary to complete a high-quality genome sequence as well as series of  
16  
17     17    comparative genomics, evolution and functional studies.

18     18    **Result:** Here we present a quail genome assembly spanning 1.04Gb with 86.63% of  
19  
20  
21     19    sequences anchored to 30 chromosomes (28 autosomes and two sex chromosomes  
22  
23     20    Z/W). Our genomic data solved the long-term debate of phylogeny among *Perdicinae*  
24  
25     21    (*Japanese quail*), *Meleagridinae* (*turkey*) and *Phasianinae* (*chicken*). Comparative  
26  
27     22    genomics and functional genomic data found that four candidate genes involved in  
28  
29     23    early-maturation had experienced positive selection, and one of them encodes follicle  
30  
31     24    stimulating hormone beta (*FSHβ*), which is correlated with different *FSHβ* levels in  
32  
33     25    quail and chicken. We re-sequenced 31 quails (10 wild, 11 egg-type and 10 meat-type)  
34  
35     26    and identified 11 and 26 candidate selective sweep regions in egg-type and meat-type  
36  
37     27    lines, respectively. That only one of them shared between egg-type and meat-type  
38  
39     28    lines suggested that they were subject to an independent selection. We also detected a  
40  
41     29    haplotype on chromosome Z which was closely linked with marron/yellow plumage  
42  
43     30    in quail using population resequencing and genome-wide association study. This  
44  
45     31    haplotype block would be useful for quail breeding program.

46  
47     32    **Conclusions:** This study provided a high-quality quail reference genome, identified  
48  
49  
50  
51  
52  
53  
54  
55  
56  
57  
58  
59  
60  
61  
62  
63  
64  
65

1  
2  
3  
4  
5  
6  
7  
8  
9  
10  
11  
12  
13  
14  
15  
16  
17  
18  
19  
20  
21  
22  
23  
24  
25  
26  
27  
28  
29  
30  
31  
32  
33  
34  
35  
36  
37  
38  
39  
40  
41  
42  
43  
44  
45  
46  
47  
48  
49  
50  
51  
52  
53  
54  
55  
56  
57  
58  
59  
60  
61  
62  
63  
64  
65

33 quail specific genes and solved quail phylogeny. We have identified genes related to  
34 quail's early-maturation and a marker for plumage color which is significant for quail  
35 breeding. The present results will facilitate biological discovery in quail and help us to  
36 elucidate the evolutionary process within the Phasianidae family.

37 **Keywords:** Japanese quail, Genome assembly, early-maturation, Phylogeny,  
38 Resequencing, plumage color, Quail breeding

1       39    **Background**

2  
3  
4       40        Most of the poultry eggs and meat products in the world come from species that  
5  
6       41        are members of the Phasianidae family including chicken (*Gallus gallus*), turkey  
7  
8       42        (*Meleagris gallopavo*) and Japanese quail (*Coturnix japonica*) within the order  
9  
10       43        Galliformes. The genomes of the two widely domesticated avian species, chicken and  
11  
12       44        turkey, have already been sequenced[1, 2]. Accordingly, the first quail draft genome  
13  
14       45        sequence had been reported with the length of contig N50 of 1.5kb by Tokyo  
15  
16       46        University of Agriculture in 2013, and then the group lately developed an improved  
17  
18       47        draft and lengthened the contig N50 to 32kb (NCBI BioSample: SAMD00009971)[3].  
19  
20       48        Recently, another Japanese quail draft genome at a level of chromosome was  
21  
22       49        published by using quail inbred line Cons DD (INRA) (NCBI BioSample:  
23  
24       50        SAMN03989050). However, with these reference genome assemblies, most of  
25  
26       51        biological questions involving genomics and phylogenetics are still unsolved in quail.  
27  
28  
29  
30  
31  
32  
33  
34

35  
36       52        The Phasianidae family has its origin about 30–46 million years ago (MYA)[1,  
37  
38       53        4-7]. Even though high degrees of conservation of synteny and chromosome  
39  
40       54        homology have been observed between quail and chicken[8, 9], these species display  
41  
42       55        a great diversity of phenotypes among the three widely used domesticated birds.  
43  
44       56        Japanese quail reach sexual maturity at 5–6 weeks of age[10], while chicken and  
45  
46       57        turkey reach this stage in about 18–22 weeks[11]. Body mass at maturity stage of  
47  
48       58        meat-type quail is about 10% that of broiler chicken and 2.5% that of turkey[11], but  
49  
50       59        quail have the fastest growth rate of all species in the Phasianidae family[12, 13].  
51  
52  
53  
54       60        Furthermore, female quails generally present a larger body size than that do in males,  
55  
56  
57  
58  
59  
60  
61  
62  
63  
64  
65

1 61 while the reverse is true both in chickens and turkeys. Not only of that, there are also  
2  
3 62 quite distinct differences existing between subpopulations of quail, though yet it has  
4  
5  
6 63 been not much long period since quail branched off from Phasianidae family.  
7  
8  
9 64 According to historical records, the domestication of Japanese quail was based on  
10  
11 65 birds selected for their crowing abilities since 11<sup>th</sup> century. However, the domestic  
12  
13  
14 66 strains, which were selected for commercial egg and meat productions, were  
15  
16  
17 67 improved only from 1910s[14] . Today, the domestic quails has differed from wild  
18  
19  
20 68 population in many traits, such as variations in plumage color, increased body size,  
21  
22  
23 69 acceleration of sexual maturity, lengthening of the reproductive phase, and  
24  
25  
26 70 disappearance of migratory characteristics[15]. Especially because of the important  
27  
28  
29 71 roles of plumage color in signaling, mate choice and evolution, mapping the gene  
30  
31  
32 72 conferring sex-linked plumage color is significant for commercial breeding in  
33  
34 73 quail[13-17]. Additionally, it is proved that quail provides more advantage over  
35  
36  
37 74 reproduction interval and space requirements than chicken, so quail has been also  
38  
39  
40 75 considered as an excellent avian model for embryonic development, reproduction,  
41  
42  
43 76 sexual differentiation, environmental toxicant indication and disease  
44  
45  
46 77 resistance[16-24].

47  
48 78 Some of the key avian model systems (i.e., the chicken, turkey, and Japanese  
49  
50  
51 79 quail) are not well solved even more locus were included[25]. Even some preliminary  
52  
53  
54 80 understanding towards phylogenies of *Phasianidae* has been learnt from archaeologic  
55  
56  
57 81 and demographic techniques, the issue that how the *Phasianidae* family evolved has  
58  
59  
60 82 been under debate for years. Due to the rapid differentiation within the *Phasianidae*

1 83 family, several studies based on fossil evidence are inconsistent with those based on  
2  
3 84 mtDNA mainly in phylogenies and divergence time[5, 6, 26]. With rapid  
4  
5  
6 85 diversification observed during the Eocene and the short divergence times within  
7  
8  
9 86 some lineages, the phylogenies of galliform birds (including the most widely used  
10  
11  
12 87 domestic bird species, chicken, turkey and quail) usually have low bootstrap support  
13  
14  
15 88 values[27]. Phylogenies based on the *CR1* retrotransposon support the hypothesis that  
16  
17  
18 89 quail and turkey are more closely related than quail and chicken, while those based on  
19  
20  
21 90 mitochondrial genome data support the hypothesis that quail is more closely to  
22  
23  
24 91 chicken than turkey[27]. However, Phylogenies of the *Perdicinae* (Japanese quail),  
25  
26  
27 92 *Meleagridinae* (turkey) and *Phasianinae* (chicken) subfamilies are still not clear with  
28  
29  
30 93 the information that only are inferred from either current fossil evidence or parts of  
31  
32  
33 94 genome. Therefore, comparing these species at a whole-genome level will enable us  
34  
35  
36 95 to recognize the process of speciation of *Phasianidae* family better. A high-quality  
37  
38  
39 96 genome assembly of the quail together with population genomic data of the quail will  
40  
41  
42 97 help to address the above questions[27, 28].

42 98 Here we report another sequence of the genome of Japanese quail (*Coturnix*  
43  
44  
45 99 *japonica*), the resequencing of 71 domestic and wild quail, and experimental results  
46  
47  
48 100 about early sexual maturity and plumage color. These data were used to characterize  
49  
50  
51 101 mechanisms of early sexual maturity in quail; resolve the phylogeny and divergence  
52  
53  
54 102 time of the Phasianidae family (quail, chicken and turkey); and detect footprints of  
55  
56  
57 103 artificial selection in quail genome. We have also identified the genetic basis for one  
58  
59  
60 104 plumage color marker that is widely used in quail breeding. These results will



1 105 facilitate biological discovery and improvement of quail for meat and egg production  
2  
3 106 and help to elucidate the basis of evolution within the Phasianidae family.  
4  
5  
6

## 7 107 **Results**

### 10 108 **Characteristics of the quail genome**

11  
12  
13  
14 109 High-quality genomic DNA extracted from a female quail (Shendan quail 1) was  
15  
16 110 used to generate 262Gb of sequence (approximately 238-fold coverage of the whole  
17  
18  
19 111 genome) (**Table S1**) using the Illumina HiSeq 2000 platform. The genome assembled  
20  
21  
22 112 using SOAP*denovo2*[29] spans 1.04Gb (93.9% of the estimated genome size for quail,  
23  
24  
25 113 **Figure S1**) with contig N50 and scaffold N50 of 27.9 Kb and 1.8 Mb, respectively  
26  
27  
28 114 (**Table S2**). About 901 Mb of sequence (86.6% of the whole genome) was anchored to  
29  
30  
31 115 30 chromosomes using a previously reported genetic linkage map[30] (**Figure 1a**).  
32  
33 116 We aligned these chromosomes back to the previous assembled **quail** genome (NCBI  
34  
35  
36 117 BioSample: SAMN03989050) and found that the two genomes came with a high  
37  
38  
39 118 degree (90.24%) of consistency (**Figure S2**). The length and GC distribution of  
40  
41  
42 119 chromosomes are highly consistent between quail and chicken genome sequences  
43  
44 120 (**Figure 1b** and **Figure S3**). Further, to evaluate the quality of the assembled quail  
45  
46  
47 121 genome, seven fosmid clones, each about 40 kb in length, were sequenced and  
48  
49  
50 122 mapped back to the quail genome assembly with a high coverage ratio (>92% for all,  
51  
52  
53 123 and six of seven fosmids >98.4%) (**Table S3** and **Figure S4**). In addition, to assess the  
54  
55  
56 124 integrity of protein-coding genes in the quail genome assembly, all transcripts  
57  
58 125 assembled from RNA-Seq reads sampled from hypothalamus and ovary of three  
59  
60  
61  
62  
63  
64  
65

1 126 stages of quail maturity, including before-laying (BL), laying (L) and peak-laying (LP)  
2  
3 127 (**Table S4**). These quality checks demonstrated the high quality of the quail genome  
4  
5  
6 128 sequence, which can serve as a reference genome for further quail genome research.  
7  
8

9 129 Genome annotation of the quail genome assembly included transposable elements  
10  
11 130 (TEs) and protein-coding genes. TEs comprise 12.4% of the genome, which is a little  
12  
13  
14 131 higher than the average value in the class Aves[31], and 9.4% consists of long  
15  
16  
17 132 interspersed nuclear elements (LINEs) (**Figure 1a** and **Table S5**). Gene prediction  
18  
19 133 combined several methods, including homology searches, *ab initio* prediction and  
20  
21  
22 134 RNA-Seq data. The merged results revealed evidence for 16,210 protein-coding genes  
23  
24  
25 135 in the quail genome (**Table S6**), and 15,972 (98.5%) genes were also supported by  
26  
27  
28 136 known protein-coding entries in at least one of the following databases: Swiss-Prot,  
29  
30  
31 137 InterPro, GO, TrEMBL or KEGG (**Table S7**).  
32  
33  
34

### 35 138 **Evolutionary relationships within the Phasianidae family**

36  
37  
38 139 To resolve phylogenetic debate in the Phasianidae family and establish the  
39  
40  
41 140 phylogenetic position of the quail with other avian species, we defined 12,178 gene  
42  
43  
44 141 families in quail and 10 other representative bird species, with *Alligator sinensis*  
45  
46  
47 142 (Chinese alligator) serving as an outgroup (**Figure S5**). 9,631 gene families were  
48  
49  
50 143 shared among four species (*Taeniopygia guttata*, *Pseudopodoces humilis*, *Gallus*  
51  
52  
53 144 *gallus* and *Coturnix japonica*, **Figure S6**) and 4,393 single-copy orthologous were  
54  
55  
56 145 shared among 12 species. These single-copy orthologous genes were used to construct  
57  
58 146 a phylogenetic tree (**Figure 2a** and **Figure S7**) and used to estimate the divergence  
59  
60  
61  
62  
63  
64  
65

1 147 times of the quail from other birds. Quail mapped to the evolutionary branch  
2  
3 148 containing domesticated poultry and was most closely related to the chicken lineage  
4  
5  
6 149 sharing a common ancestor about 22.2 MYA (**Figure 2a**). We used our genome-wide  
7  
8  
9 150 comparative data to estimate the divergence time of *Galliformes* and *Anseriformes* at  
10  
11 151 69.1 (64.5–75.4) MYA. Our results therefore fully supported a closer relationship  
12  
13  
14 152 between quail and chicken than between quail and turkey. The phylogeny we  
15  
16  
17 153 generated implied that the quail and chicken genomes likely share significant  
18  
19  
20 154 similarities, which makes further comparison of their genomes intriguing.  
21  
22

23 155 In total, 95.5% of quail genome sequences occurred in blocks colinear with those  
24  
25  
26 156 in chicken (**Figure 2b** and **Table S8**). However, a total of 131 large inversions (block  
27  
28  
29 157 length >5 kb) between quail and chicken chromosomes were also identified and most  
30  
31  
32 158 of these were located on chromosomes 1 (24 breakpoints) and Z (24 breakpoints)  
33  
34 159 (**Table S9**). Next, to investigate the nature of chromosome breaks that differentiate the  
35  
36  
37 160 quail and chicken genomes, and to associate these differences with possible  
38  
39  
40 161 phenotypic changes during their divergence, we tested for gene set enrichments at the  
41  
42  
43 162 boundaries. We identified 433 genes located within the 1-kb regions flanking the  
44  
45  
46 163 breakpoints of these inversions (**Table S9**). We tested for gene functions enrichment  
47  
48  
49 164 within these inversions and searched for candidate mutations that might contribute to  
50  
51  
52 165 specific phenotypes in quail compared with chicken. Results of GO term enrichment  
53  
54  
55 166 analysis of these genes revealed the terms GO:0005882: intermediate filament  
56  
57 167 ( $P=1.53e-05$ ) and GO:0005200: structural constituent of cytoskeleton ( $P=0.00029$ )  
58  
59 168 was significantly enriched (**Figure S8** and **Figure S9**). In particular, a gene encoding  
60  
61  
62  
63  
64  
65

1 169 tyrosinase-related protein 1 (*TYRPI*) was identified in the flanking region of an  
2  
3 170 inversion on chromosome Z, which had been reported as a candidate locus for the  
4  
5  
6 171 recessive, sex-linked roux (br(r)) phenotype in Japanese quail[32] (**Figure 2c**).

## 10 172 **Nucleotide diversity and population structure**

13 173 To obtain a comprehensive understanding of genetic diversity in quail population,  
14  
15  
16 174 we collected a total of 31 samples for genome re-sequencing, which included 10  
17  
18  
19 175 quails from wild population, 11 egg-type quails and 10 meat-type quails from  
20  
21  
22 176 domesticated subpopulations (**Table S10**). We sequenced these samples with an  
23  
24  
25 177 average of reads coverage of  $\sim 3.5\times$  and mapped the reads to our reference genome  
26  
27 178 (Shendan quail 1). Eventually, we identified a total of 22,495,404 bi-allelic SNPs  
28  
29  
30 179 among the 31 re-sequenced samples. Of these, the average of genotype missing rates  
31  
32  
33 180 in wild, egg-type and meat-type quails were 11.2%, 8.6% and 7.3%, respectively.  
34  
35  
36 181 Through a series of quality controls for SNP filtration (*See more detail in Method*), we  
37  
38  
39 182 obtained a final total of 21,886,307 high-quality SNPs, which included 15,573,075,  
40  
41 183 12,722,389 and 14,107,546 SNPs in wild quails, egg-type quails and meat-type quails,  
42  
43  
44 184 respectively (**Table 1**). Of the  $\sim 21\text{M}$  high-quality SNPs, only 319,052 SNPs were  
45  
46  
47 185 located in exon regions, yet there were 8,929,259 SNPs in intron regions. Thus, the  
48  
49  
50 186 ratio of the number of SNPs in exon regions and intron regions was  $3.57e-2$ , which  
51  
52  
53 187 was lower than that of turkey ( $4.30e-2$ )[33] but was similar to that of chicken  
54  
55 188 ( $3.50e-2$ )[34]. Accordingly, we found that the non-synonymous SNPs (N) and the  
56  
57  
58 189 synonymous SNPs (S) in quail were 90,031 and 229,019, respectively, with a ratio of

1 190 N/S of 0.39, which was lower than that both of chicken (0.41) and turkey (0.45). It  
2  
3  
4 191 was suggested that much more genes in quail had been subjected to different degree  
5  
6 192 of selections compared to other poultries. Meanwhile, we also found that no matter in  
7  
8  
9 193 whole genome scale or in genic regions, the number of SNP within wild quail  
10  
11  
12 194 population was more than that within other two domesticated subpopulations.

13  
14  
15 195 To evaluate the genetic diversity of our quail population, we calculated two  
16  
17  
18 196 common summary statistics across the whole genome,  $\pi$  and  $\theta_w$  values[35, 36], by  
19  
20  
21 197 using 100-kb sliding overlapped window with step length of 10 kb (**Table 1** and **Table**  
22  
23 198 **S11**). The estimated amount of  $\theta_w$  in wild quail population was substantially higher  
24  
25  
26 199 than that in other two domesticated subpopulations on autosomes, but the difference  
27  
28  
29 200 of  $\pi$  estimators among the three populations was minimal, which indicated that our  
30  
31  
32 201 wild population still contained greater genetic diversity though the divergence within  
33  
34  
35 202 wild population was not very apparent yet. On chromosome Z, however, whether  $\pi$  or  
36  
37 203  $\theta_w$  of egg-type quail was dramatically lower than that of both wild quail and  
38  
39  
40 204 meat-type quail, even if all the egg-type quails were sampled from female individuals  
41  
42  
43 205 whose effective number of chromatid Z ( $N_e = 11$ ) was slightly smaller than that of  
44  
45  
46 206 wild quails ( $N_e = 15$ ) and meat-type quails ( $N_e = 15$ ), respectively. Furthermore, one  
47  
48  
49 207 thing that caught our attention was that all the three populations still kept a relatively  
50  
51  
52 208 low level of diversity on genic regions of chromosome Z. It was implied that a  
53  
54  
55 209 stronger positive selection might act on chromosome Z of egg-type quail, which led to  
56  
57  
58 210 an accelerated reduction of genetic diversity on a large scale. Additionally, we also  
59  
60  
61 211 assessed an estimator of neutral test, Tajima's  $D$ [36], with a purpose to distinguish

1 212 between a DNA sequence evolving randomly and one evolving under a non-random  
2  
3 213 process. It was found that the three populations were under neutral evolution at  
4  
5  
6 214 chromosomal level, except of the chromosome Z of wild population. This led us to  
7  
8  
9 215 suspect that the relatively conservative chromosome Z in evolutionary history  
10  
11  
12 216 exposed a narrow genetic background within our wild population.  
13

14  
15 217 To investigate the phylogenetic relationships and population structure among the  
16  
17 218 31 quail samples (**Table S10**), we constructed a neighbor-joining tree by using  
18  
19  
20 219 pairwise genetic distance matrix (**Figure 3a**) and performed principal component  
21  
22  
23 220 analysis (PCA) based on the variance-standardized genotype relationship matrix  
24  
25  
26 221 (**Figure 3b**).The neighbor-joining tree showed that our samples could be divided into  
27  
28  
29 222 two major clusters, corresponding to wild quails and domesticated quails, with a  
30  
31  
32 223 further subdivision of domesticated quails into egg-type quails and meat-type quails.  
33  
34 224 Similarly, PCA also revealed the main divergence between the wild population and  
35  
36  
37 225 domesticated population in eigenvector 1, and the secondary divergence between the  
38  
39  
40 226 egg-type subpopulation and the meat-type subpopulation in eigenvector 2 (**Figure 3b**).  
41  
42  
43 227 However, our wild samples clustered together and it was hard to distinguish in PCA  
44  
45  
46 228 scatter plot. That was, it was likely to be a similar genetic background in the wild  
47  
48  
49 229 population, even if they exhibited rich variations in the number of segregation sites. In  
50  
51  
52 230 order to better estimate the ancestral component in our quail populations, we adopted  
53  
54 231 likelihood models embedded in structure by using ADMIXTURE[37]. The  
55  
56 232 initialization of population number ( $K$ ) was tried from 2 to 7, and the cross-validation  
57  
58  
59 233 error was estimated at the minimum when  $K$  was set to 2 (**Figure 3d** and **Figure S10**).  
60  
61  
62  
63  
64  
65

1 234 It was suggested that the ideal population stratification manifested the wild population  
2  
3 235 and domesticated population rather than three populations. It was because the  
4  
5  
6 236 difference between egg-type quails and meat-type quails was much less than that of  
7  
8  
9 237 the former two. Additionally, we could see that the wild populations began to appear  
10  
11 238 the differentiation when  $K$  was equal to 5, indicating that the wild quails had distinct  
12  
13 239 ancestors. However, we would have preferred to divide the 31 samples into three  
14  
15 240 populations (egg-type, meat-type and wild quail) according to their physiological and  
16  
17 241 ethological characteristics. To characterize linkage disequilibrium (LD) blocks in wild  
18  
19 242 and domesticated quails, we estimated the squared correlations ( $r^2$ ) of pairwise SNPs  
20  
21 243 with sliding window lengths from 1 to 300 kb. LD decayed to half of its maximum  
22  
23 244 within a window length of ~30 bp for wild quail, ~50 bp for egg-type quail and ~60  
24  
25 245 bp for meat-type quail, respectively (**Figure 3c**). Such rapid decay of LD in each  
26  
27 246 population might be due to the high density of SNP in quail genome (one SNP in  
28  
29 247 every ~70 bases on average), indicating that the heterozygosity among individuals and  
30  
31 248 high heterogeneity of the quail population resulted from gene segregation and a high  
32  
33 249 degree of recombination within the quail genome. Similarly, other studies involving  
34  
35 250 the population structure of Aves animals also revealed the low level of LD  
36  
37 251 corresponding to the open genome and fluid genomic background in bird population  
38  
39 252 which could facilitate adaptive variation[38, 39].  
40  
41  
42  
43  
44  
45  
46  
47  
48  
49  
50  
51  
52  
53  
54  
55  
56  
57  
58  
59  
60  
61  
62  
63  
64  
65

## 254 **Signals of selection across the quail genome**

1 255 Due to the low level of population divergence in our wild quails, some signals of  
2  
3  
4 256 selective sweeps from short genomic regions could be masked in domesticated  
5  
6 257 populations. Thus, we sought to detect the large-scale regions that exhibited  
7  
8  
9 258 successive selective sweep in whole genome between domesticated population and  
10  
11  
12 259 wild population by using 100-kb overlapping sliding window in 10-kb step. The  
13  
14 260 reduction of diversity (ROD), defined as  $ROD = 1 - \pi_{\text{domesticated}}/\pi_{\text{wild}}$ , was introduced to  
15  
16  
17 261 measure the loss of diversity in domesticated populations comparing with wild  
18  
19  
20 262 population. Additionally, in order to avoid ROD being excessively affected by the  
21  
22  
23 263 diversity in wild population, we also added significantly negative Tajima's  $D$  ( $D < -2$ )  
24  
25 264 in domesticated population as a parallel criterion, which meant recent selective sweep  
26  
27  
28 265 or a population expansion following a complete bottleneck[40-42]. From the  
29  
30  
31 266 comparison between egg-type quails and wild quails, we identified a total of 11 large  
32  
33  
34 267 scale regions of selection sweep with the spans all greater than 100 kb, where the  
35  
36  
37 268 sliding windows presented high ROD values in the 5% right tail of the distribution of  
38  
39  
40 269 ROD frequency (**Figure S11** and **Table S12**). We also found that the fixation index  
41  
42  
43 270 ( $F_{ST}$ ), a measure of population divergence due to genetic structure, was substantially  
44  
45  
46 271 calculated at a high level ( $F_{ST} > 0.4$ ) in each sliding window of these regions.  
47  
48  
49 272 Interestingly, we observed, 10 of the 11 regions were located on chromosome Z and  
50  
51  
52 273 the longest one was ~1.8 Mb in length (**Figure 3e**). Furthermore, we identified the  
53  
54  
55 274 gene (*CCDC171*) significantly associated with quail plumage color, included in a  
56  
57  
58 275 182-kb haplotype block (*see the association study described below*), was just located  
59  
60  
61 276 on the longest region. It was indicated that positive selection for plumage color might



1 277 have resulted in a strong selective sweep on chromosome Z in egg-type quail. More  
2  
3  
4 278 than that, a total of 73 gene sequences involving these selective sweeps were  
5  
6 279 annotated by the related terms of Gene Ontology (GO). By using Kyoto Encyclopedia  
7  
8  
9 280 of Genes and Genomes (KEGG) database, we noticed that some of genes possibly  
10  
11 281 played a role in sex hormones[43], embryo development[44, 45], increase of egg  
12  
13 282 weight[46] and plumage color[47] (**Table S13**). Thus, we surmise that these important  
14  
15 283 traits in egg-type quail might have suffered stronger artificial selection, which led to  
16  
17 284 many large scales of selection sweep around these key loci on chromosome Z.  
18  
19  
20 285 Similarly, we also identified 26 large regions of selective sweep between meat-type  
21  
22 286 quail and wild quail on chromosomes 1, 2, 3, 8, 13 and Z (**Figure 11** and **Table S14**).  
23  
24  
25 287 The longest span could be as long as ~1 Mb on chromosome 2. The total length of  
26  
27 288 selective sweeps in meat-type quail was estimated at ~8.6 Mb, which was longer than  
28  
29 289 that of egg-type quail (~5.3 Mb). That brought us to an inference that the breed  
30  
31 290 improvement for meat-type quail was likely to aim at much more regions besides of  
32  
33 291 some ones on chromosome Z. Subsequently, we annotated 127 genes except of ones  
34  
35 292 on chromosome 8, and described their biological function by using enrichment  
36  
37 293 analysis (**Table S15**). Although most of genes that correspond to relevant traits had  
38  
39 294 not been verified in meat-type quail, these candidate genes would help us to facilitate  
40  
41 295 understanding of domestication process in further study. However, it was worth  
42  
43 296 mentioning that there was hardly any selective sweep shared between egg-type quail  
44  
45 297 and meat-type quail except for only a 160-kb region (20.38-20.54 Mb) on  
46  
47 298 chromosome Z, where we annotated two genes with the codes of COT10486 and  
48  
49  
50  
51  
52  
53  
54  
55  
56  
57  
58  
59  
60  
61  
62  
63  
64  
65

1 299 COT10487 (**Table S13** and **Table S15**). Such more different large selective sweeps,  
2  
3 300 we speculated, egg-type quail and meat-type quail might be domesticated from their  
4  
5  
6 301 respective ancestral populations independently.  
7  
8

9 302 Despite selective sweep gave us a new insight into an evidence of domestication  
10  
11 303 process, a fair number of differentially expressed genes dispersed on the whole  
12  
13  
14 304 genome, however, also contributed to the divergent traits between domesticated quails  
15  
16  
17 305 and wild quails. Thus, we picked up all the non-synonymous SNPs where the alleles  
18  
19  
20 306 were divided into domesticated group and wild group, with a loose measure of  
21  
22  
23 307  $F_{ST}>0.3$ . The genes involved in these eligible SNPs could be annotated by GO  
24  
25  
26 308 database. According to this method, we detected 8206 divergent non-synonymous  
27  
28  
29 309 SNPs and annotated a total of 1453 genes between egg-type quail and wild quail, as  
30  
31  
32 310 similar as 11085 divergent non-synonymous SNPs and 1189 genes between meat-type  
33  
34 311 quail and wild quail. Then we showed the top 20 KEGG pathways by using functional  
35  
36  
37 312 enrichment analysis for these genes, respectively for egg-type quail and meat-type  
38  
39  
40 313 quail, and found that there were 12 common biological pathways shared by egg-type  
41  
42  
43 314 quail and meat-type quail (**Figure S12** and **Figure S13**). Of these, the most significant  
44  
45  
46 315 pathway reflected the neuroactive ligand-receptor interaction, which might be related  
47  
48  
49 316 to embryonic development and sexual maturation[48, 49]. Other functional pathways,  
50  
51  
52 317 specific to egg-type quail and meat-type quail respectively, seemed not very  
53  
54  
55 318 significant in enrichments, indicating that artificial selections that targeted at these  
56  
57  
58 319 traits were not strong. In summary, many similar selections in both two domesticated  
59  
60  
61 320 subpopulations revealed that the phenotypic difference between egg-type quail and  
62  
63  
64  
65

1 321 meat-type quail was not that significant, which was consistent with the population  
2  
3 322 stratification that the optimal number of populations was two rather than three.  
4  
5  
6

7 323 **Gene related to early sexual maturity**  
8  
9

10 324 To explore the biological mechanism of very early sexual maturity in quail,  
11  
12 325 genes were traced from both gene family evolution and positive selection events in  
13  
14 326 the quail lineage. We found that several gene families have expanded in the quail  
15  
16 327 genome compared with those of other domesticated birds. These expanded gene  
17  
18 328 families include those encoding gonadotropin-releasing hormone 1 (*GnRH1*, **Figure**  
19  
20 329 **S14**), the lysophospholipase catalytic domain and phospholipase A2 (**Table S16**).  
21  
22 330 Moreover, four positively selected genes (PSGs) were detected in the quail lineage  
23  
24 331 and the proteins encoded by these genes (*FSH $\beta$* , *PLCB4*, *ITPR1* and *PLA2G4*) are  
25  
26 332 involved in the *GnRH* (gonadotropin-releasing hormone) signaling pathway. Follicle  
27  
28 333 stimulating hormone *beta* (*FSH $\beta$* ) protein, is a glycoprotein polypeptide hormone that,  
29  
30 334 in conjunction with luteinizing hormone, contributes to growth and reproduction[50].  
31  
32 335 Transcription of the *FSH $\beta$*  gene limits the rate of production of mature *FSH*[51] which  
33  
34 336 is required for ovarian folliculogenesis in females and for spermatogenesis in males in  
35  
36 337 conjunction with testosterone[52]. We identified two amino acids in the quail *FSH $\beta$*   
37  
38 338 protein at position 37 (M→F/L) and position 99 (G→E/A) that were predicted to be  
39  
40 339 under positive selection (**Figure 4a**). We used ELISA to measure the level of *FSH $\beta$*   
41  
42 340 protein during early developmental stages and found that the level of *FSH $\beta$*  in early  
43  
44 341 maturing quail blood is consistently higher than that in chicken ( $P<0.05$ ) (**Figure 4c**).  
45  
46  
47  
48  
49  
50  
51  
52  
53  
54  
55  
56  
57  
58  
59  
60  
61  
62  
63  
64  
65

1 342 We used SWISS-MODEL to model the structure of quail *FSH $\beta$*  using the Follitropin  
2  
3 343 subunit beta (4ay9.1.B) protein[53] as a template. These two amino acid substitutions  
4  
5  
6 344 were mapped to the 3D protein structure and were located near the  $\beta$ -pleated sheet  
7  
8  
9 345 that interacts with the *FSH* receptor (**Figure 4b**). *PLCB4*, *ITPR1* and *PLA2G4*  
10  
11 346 (**Figure S15-17**), together with other molecules (e.g., inositol 1,4,5-trisphosphate,  
12  
13  
14 347 diacylglycerol and protein kinase C) stimulate release of gonadotropins including  
15  
16  
17 348 luteinizing hormone and follicle stimulating hormone[54, 55]. Gene expansions in the  
18  
19  
20 349 *GnRH* families, and also PSGs in the *GnRH* signaling pathway, are likely to be  
21  
22  
23 350 involved in the acceleration of growth and sexual maturity in the quail. Subsequently,  
24  
25  
26 351 we scanned the SNPs in the coding sequence (CDS) of the four genes within the 31  
27  
28  
29 352 wild and domestic individuals that whether they were synonymous or  
30  
31  
32 353 non-synonymous mutations, and found that all the 83 SNPs except four were  
33  
34  
35 354 synonymous mutations. However, all the divergent alleles of SNP loci did not  
36  
37  
38 355 generally segregate according to the three subpopulations, and the domesticated and  
39  
40  
41 356 wild quails presented no large-scale selective sweeps around these genes.

### 357 **Gene families related to immune system function**

358 We identified a total of 1,587 immune response-related genes in quail (**Table S17**)  
359 by aligning the entire predicted gene set of quail against 2,257 genes that have been  
360 annotated with roles in the innate immune responses of *Homo sapiens*, *Mus musculus*  
361 or *Bos taurus* at InnateDB or Gene Ontology databases. Compared to chicken, turkey  
362 and duck, several expanded gene families were identified in quail. These included

1 363 *Klf4*, which is indispensable for differentiation of inflammatory monocytes[56] and  
2  
3 364 negative regulation of innate immune response against several viruses in human  
4  
5  
6 365 embryonic kidney 293 cells[57] (22 copies in quail, 17 in chicken, 16 in turkey and 12  
7  
8  
9 366 in duck); *Foxa2*, which regulates genetic programs that influence pulmonary  
10  
11 367 inflammation mediated by Th2 cells[58] (13 copies in quail, seven in chicken, four in  
12  
13 368 turkey and five in duck); and *ITCH*, which acts in T-helper cell differentiation and  
14  
15 369 T-cell activation and tolerance[59] (7 copies in quail, three in chicken, four in turkey  
16  
17 370 and two in duck). Moreover, we focused on the number of ‘Immunoglobulin subtype’  
18  
19 371 genes and found that there are 109 in quail, while chicken, duck, zebra finch  
20  
21 372 (*Taeniopygia guttata*) and turkey each had 62 or fewer immunoglobulin-related genes  
22  
23 373 (62 copies in chicken, 29 in duck, 29 in zebra finch and 34 in turkey; **Figure 4d**). We  
24  
25 374 detected 69 genes encoding a putative ‘Reverse transcriptase or Reverse transcriptase  
26  
27 375 domain’ in quail but only two and four such genes in chicken and turkey, respectively  
28  
29 376 (**Figure S18**). These domains are signatures of retroviruses integrated into the host  
30  
31 377 genome. Next we compared the *MHC-B* region between quail and chicken (**Figure**  
32  
33 378 **S19**) and found that there was an inversion including the genes encoding the proteins  
34  
35 379 *TAP1* and *TAP2*, which transport peptides from the cytosol into the endoplasmic  
36  
37 380 reticulum to bind *MHC* class I molecules that are being synthesized[60], and *BFIV21*,  
38  
39 381 which encodes a protein that presents antigens such as the avian leukosis virus[61].  
40  
41 382 We also found four copies of the *BLEC2* (C-type lectin-like NK cell receptor) gene in  
42  
43 383 quail, but only one in chicken. However, several other *MHC* genes (e.g., *KIFC1*,  
44  
45 384 *V-BG1* and *BG2*) were not detected in the quail genome. A better understanding of  
46  
47  
48  
49  
50  
51  
52  
53  
54  
55  
56  
57  
58  
59  
60  
61  
62  
63  
64  
65

1 385 these immune-related genetic changes will help us characterize the immune response  
2  
3 386 in quail and facilitate the development of targeted vaccines for quail.  
4  
5  
6

7 387

### 8 9 10 388 **Genome wide association analysis of plumage color**

11  
12 389 In order to identify sexed-linked genes conferring plumage color, we bred a set of  
13  
14 390 egg-type quails with maroon or yellow plumage, which had been confirmed as  
15  
16 391 sex-linked inheritance in quail and were consistent in a segregation ratio of Mendelian  
17  
18 392 law in our previous investigation (*See more details in Method*). Of these, we sampled  
19  
20 393 40 quails, including 20 male quails and 20 female quails, and re-sequenced their  
21  
22 394 genomes for case-control analysis (**Table S18**). We identified ~20M bi-allelic SNPs in  
23  
24 395 these 40 individual quails at a sequencing depth of 20–30×. After controlling for SNP  
25  
26 396 quality and redundant LD (*see more details in Methods*), a final total of 864,292 SNPs  
27  
28 397 was retained for subsequent analyses. A genome similarity test of the 40 quail samples  
29  
30 398 was conducted using high-quality SNPs, and we found that similarities between any  
31  
32 399 pair of individuals ranged from 70.4 to 86.5%, which indicated relatively high  
33  
34 400 homology between them.  
35  
36  
37  
38  
39  
40  
41  
42  
43  
44  
45

46 401 Due to the relatively close relationships between the 40 samples, the effect of  
47  
48 402 relativeness matrix affecting the variance of plumage color would be considered as  
49  
50 403 the covariance. We assessed the relationships matrix of the 40 samples by using  
51  
52 404 GEMMA v0.94[62] and adopted the linear mixed model for association analysis. By  
53  
54 405 Bonferroni correction, the association analysis showed that two SNPs, 61102026 on  
55  
56 406 chromosome 1 and 23173971on chromosome Z had significant effects on plumage  
57  
58  
59  
60  
61  
62  
63  
64  
65

1 407 color (adjusted  $P=0.028$  and  $P=0.019$ , respectively) (**Figure 5a**, **Figure S20** and  
2  
3  
4 408 **Table S19**). However, unlike the locus on chromosome 1, SNPs on chromosome Z  
5  
6 409 near 23173971 showed a continuous peak on the Manhattan plot. In our previous  
7  
8  
9 410 analysis of plumage color heredity, we suggested that the locus on chromosome Z was  
10  
11 411 most likely associated with plumage color. In a confirmation study, we added the 21  
12  
13  
14 412 previous re-sequenced quails with “maroon” plumage (including 10 wild quails and  
15  
16  
17 413 11 egg-type quails, **Table S10**) to rerun the association analysis for the two loci. The  
18  
19  
20 414 locus on chromosome Z was found to be more significantly associated with plumage  
21  
22 415 color than before (adjusted  $P=0.015$ ). Conversely, there was no significant signal on  
23  
24  
25 416 chromosome 1 (adjusted  $P$ -value for SNP 61102026 fell to 1.000). Subsequently, the  
26  
27  
28 417 SNP 23173971 on chromosome Z, we found, was located closely to gene Coiled-coil  
29  
30  
31 418 domain-containing 171 (*CCDC171*) with a length of 135 kb. Therefore, we chose  
32  
33  
34 419 SNP 23173971 on chromosome Z as the index SNP within the region of 200 kb for  
35  
36 420 conditional haplotype-based association testing. Then, 47 SNPs with  $r^2>0.7$  and  
37  
38  
39 421 adjusted  $P>0.01$  had been clumped for association testing. Using 5,000 permutations,  
40  
41  
42 422 a high linked haplotype with a range of 182 kb could significantly explain the  
43  
44 423 maroon/yellow variation ( $\chi^2=37.7$ ,  $P=8.563e-06$ ). The well-known *TYRP1* gene that  
45  
46  
47 424 be conferred variation plumage color[47, 63] was located approximately 531 kb away  
48  
49  
50 425 from *CCDC171* (**Figure 2c**). The average of LD value between them was estimated at  
51  
52  
53 426 less than 0.2. It was suggested that the gene controlling plumage color in our  
54  
55  
56 427 population was different from *TYRP1*. Furthermore, we chose eight SNPs  
57  
58  
59 428 significantly associated with plumage color, five of which are located within  
60  
61  
62  
63  
64  
65

1 429 *CCDC171*, and designed PCR primers to amplify these SNP markers to genotype  
2  
3 430 further 100 “maroon” and 100 “yellow” quails. Interestingly, 99.75% of these SNPs  
4  
5  
6 431 were consistent between genotype and phenotype, suggesting that the *CCDC171* gene  
7  
8  
9 432 controls plumage color in quail (**Figure 5b**). Therefore, we cloned the *CCDC171*  
10  
11  
12 433 gene from yellow and maroon quail and found that this gene encoded different  
13  
14  
15 434 transcripts in quail depending on plumage color (**Figure 5c** and **Figure S21**). To  
16  
17  
18 435 examine the nature of the *CCDC171* genetic variant, we characterized the transcripts  
19  
20  
21 436 from the maroon and yellow alleles. The transcript from yellow was longer than  
22  
23  
24 437 maroon’s (about 232 bp) at the upstream of the translation initiation site of maroon  
25  
26  
27 438 and has a deletion (147 bp) at position 787. In addition, we examined the differential  
28  
29  
30 439 expression of *CCDC171* in yellow and maroon quails and found there were no  
31  
32  
33 440 significant difference between the collected samples (*t*-test,  $P>0.05$ ).

34 441

## 37 442 **Discussion**

40 443 Birds represent the most widespread class of domesticated animals in the world  
41  
42  
43 444 and are the subjects of many evolutionary, biological and pathology studies that  
44  
45  
46 445 illustrate the relationships among these avian species[27]. The timing of sexual  
47  
48  
49 446 maturity is critical for both plants and animals. Quail have a unique maturation  
50  
51  
52 447 program compared with other birds and reach sexual maturity in a very short time. We  
53  
54  
55 448 detected four promising genes for this trait under positive selection in the *GnRH*  
56  
57  
58 449 signaling pathway in quail. Gonadotropins act on the testis and ovary to promote their  
59  
60  
61 450 development and the production of steroid hormones[64]. Further functional analysis



1 451 of these genes should provide new insights into the genetic mechanisms that regulate  
2  
3 452 avian sexual maturity.  
4  
5

6 453 Analyzing the genes and mutations related to the development and evolution of  
7  
8  
9 454 agronomic traits in quail will also improve our understanding of the genetics of  
10  
11  
12 455 domestication. Genome-wide comparisons of domesticated (egg-type and meat-type  
13  
14  
15 456 lines) and wild quail identified several footprints of artificial selection. These  
16  
17  
18 457 selective-sweep regions harbor candidate genes associated with important  
19  
20  
21 458 agro-economic traits. Genetic variations in these genes will be a rich resource for  
22  
23  
24 459 improving quail egg and meat production *via* genetic selection. It is noting that  
25  
26  
27 460 egg-type and meat-type quails didn't share selective sweep regions when compared  
28  
29  
30 461 with wild quails (**Figure S11**). It is meaning that egg-type/meat-type quails might be  
31  
32  
33 462 independently selected after domestication or two separate domestication events in  
34  
35  
36 463 quails. Further studies would be carried out for the domestication history of quails.  
37  
38  
39 464 Based on resequencing data, we have also identified a haplotype that is completely  
40  
41  
42 465 correlated with the control of "maroon/yellow" plumage color, a trait that has been  
43  
44  
45 466 used extensively in the breeding of domestic quail as a sex-linked marker.

46 467 Some recent studies[65] which use several gene data also support the phylogeny  
47  
48  
49 468 of among the *Perdicinae*, *Meleagridinae* and *Phasianinae* families. However, lack of  
50  
51  
52 469 genome-wide data cannot make strong conclusions. We used whole-genome  
53  
54  
55 470 sequences of Japanese quail, turkey and chicken to represent each clade and resolve  
56  
57  
58 471 the phylogenetic relationships among the *Perdicinae*, *Meleagridinae* and *Phasianinae*  
59  
60  
61 472 families. Our study provided a fully resolved branches with genome-scale data. Our

1 473 results support a split of the *Perdicinae* and *Phasianinae* branches from the  
2  
3 474 *Meleagridinae* branch about 69 MYA. Calibration based on fossils of early penguins  
4  
5  
6 475 together with mitochondrial genome sequences of a modern albatross (*Diomedea*  
7  
8  
9 476 *melanophris*), petrel (*Pterodroma brevirostris*) and loon (*Gavia stellata*) allowed the  
10  
11  
12 477 divergence time of the *Anseriformes* and *Galliformes* to be estimated as  $77.1 \pm 2.5$   
13  
14 478 MYA[5]. Other recent avian genome data was used to estimate the divergence of  
15  
16  
17 479 *Anseriformes* and *Galliformes* at about 66 MYA[66]. The resolution of their  
18  
19  
20 480 phylogeny will improve our understanding of the genetics of speciation of quail,  
21  
22  
23 481 chicken and turkey. In this research, we obtained a high quality draft of the Japanese  
24  
25  
26 482 quail genome and whole-genome resequencing data of multiple quail sub-populations  
27  
28  
29 483 which will provide new opportunities to further understand quail biology and develop  
30  
31  
32 484 molecular markers for improving economically important agronomic traits.

33  
34 485

## 35 36 37 486 **Conclusions**

38  
39  
40 487 In conclusion, we accomplished genome assembly of quail with high-depth  
41  
42  
43 488 sequence and carried out resequencing for 71 domestic and wild quail. We solved the  
44  
45  
46 489 long-term arguments of phylogeny of quail, turkey and chicken and interpreted the  
47  
48  
49 490 biological mechanism of very early sexual maturity for quail. From the GWAS  
50  
51  
52 491 analysis, we detected a haplotype marker on chromosome Z which is important for  
53  
54  
55 492 quail breeding. These analyses should provide valuable resource and information for  
56  
57  
58 493 the future studies for quail.

59  
60 494

1 495 **Materials and Methods**

2  
3  
4 496 **Animal samples collection**

5  
6  
7 497 All the 31 wild and domestic quails were collected from China. Of these, the 10  
8  
9  
10 498 wild quails were sampled from the common habitats of wild quails in Henan province  
11  
12 499 and Shandong province, respectively. The other domestic quails were offered from  
13  
14  
15 500 some of local breeding companies for quail improvement of different provinces  
16  
17  
18 501 (**Table S10**). The maroon or yellow plumage population was respectively derived  
19  
20  
21 502 from two pure lines offered from Hubei Shendan Healthy Food Co., Ltd. In our  
22  
23  
24 503 previous investigation, we found that the F<sub>2</sub> population from a crossing of the maroon  
25  
26  
27 504 plumage line and the yellow plumage line showed a 3:1 segregation ratio in plumage  
28  
29  
30 505 color. Thus, we randomly chose 20 yellows and 20 maroons from the pure lines  
31  
32  
33 506 respectively for association study (**Table S18**). All the 71 quail samples were used for  
34  
35  
36 507 re-sequencing by BGI-Shenzhen. Additionally, the 100 maroon ones and the 100  
37  
38  
39 508 yellow ones were also derived from the two pure lines for validation of plumage color  
40  
41  
42 509 gene.

43 510 **Genome sequencing and assembly**

44  
45  
46 511 A female quail was used for all genome sequencing. All experiments in this  
47  
48  
49 512 project were performed according to the principles of the animal ethics committee at  
50  
51  
52 513 BGI (China). DNA samples were isolated from blood following standard molecular  
53  
54  
55 514 biology techniques. A series of libraries of different insert sizes ranging from 170 bp  
56  
57  
58 515 to 40 kb (170 bp, 500 bp, 800 bp, 2 kb, 5 kb, 10 kb, 20 kb and 40 kb) were  
59  
60  
61 516 constructed and used for a shotgun sequencing strategy. The Illumina HiSeq 2000

1 517 system was used to generate paired-end reads. A total of 262Gb of raw data was  
2  
3 518 obtained and reads were filtered based on the following criteria. Reads with 1) >10  
4  
5  
6 519 percent unidentified (N) bases, 2) >40% low-quality bases, or 3) contaminated by  
7  
8  
9 520 adaptors or duplicated during PCR were discarded; about 199Gb of clean data  
10  
11  
12 521 remained. The genome size (G) of quail was first estimated at about 1.1Gb using the  
13  
14 522 17-mer depth frequency distribution method:  $G = K\text{-mer\_num}/\text{Peak\_depth}$  (**Figure**  
15  
16  
17 523 **S1**). The genome was assembled using *SOAPdenovo2* v2.04.4[29]. Next, paired-end  
18  
19  
20 524 reads were then mapped back to the initial assembled genome to link contigs into long  
21  
22  
23 525 scaffolds.

## 26 526 **Genome annotation**

27  
28  
29 527 RepeatMasker v4.0.5[67] and Repeat-ProteinMask v4.0.5 were used to search for  
30  
31  
32 528 TEs against the RepBase library v20.04[68] to detect known repeats. A custom TE  
33  
34  
35 529 library was then constructed using RepeatModeller v1.0.8 and LTR\_FINDER  
36  
37  
38 530 v1.0.6[69] for *denovo* detection of repeats. Tandem Repeat Finder v4.0.7[70] was also  
39  
40  
41 531 used to predict tandem repeats. Final results of TE detection were integrated using  
42  
43  
44 532 in-house scripts.

45  
46 533 Homology-based and *ab initio* gene prediction methods, assisted by  
47  
48  
49 534 transcriptome sequencing, were used to analyze coding DNA sequences and to model  
50  
51  
52 535 genes. Initially, protein data for *Homo sapiens* (human), *Meleagris gallopavo* (turkey),  
53  
54  
55 536 *Gallus gallus* (chicken), *Taeniopygia guttata* (zebra finch) and *Anas platyrhynchos*  
56  
57  
58 537 (duck) were downloaded from the Ensembl v80 database[71] and aligned to the  
59  
60  
61 538 predicted proteins encoded by the quail genome using BLAT[72]. GeneWise

1 539 v2.2.0[73] was then used to further improve the accuracy of alignments and predict  
2  
3 540 gene structures. AUGUSTUS v3.1[74] and GENSCAN v1.0[75] were then used for  
4  
5  
6 541 *ab initio* gene prediction. Transcriptome reads were mapped to the genome with  
7  
8  
9 542 TopHat v1.2[76] and Cufflinks v2.2.1[77] was used to confirm gene structures.  
10  
11 543 Subsequently, we combined the homology-based and *denovo* predicted gene sets  
12  
13 544 using GLEAN[78] and integrated the GLEAN and transcriptome results with in-house  
14  
15 545 scripts to generate a representative and non-redundant gene set.  
16  
17  
18  
19

## 20 546 **Gene evolutionary analysis**

21  
22  
23 547 Gene families in quail, *Gallus gallus* (chicken), *Anas platyrhynchos* (duck),  
24  
25 548 *Columba livia* (pigeon), *Falco cherrug* (Saker falcon), *Falco peregrinus* (Peregrine  
26  
27 549 falcon), *Ficedula albicollis* (collared flycatcher), *Geospiza fortis* (medium ground  
28  
29 550 finch), *Meleagris gallopavo* (turkey), *Pseudopodoces humilis* (ground tit),  
30  
31 551 *Taeniopygia guttata* (zebra finch) and *Alligator sinensis* (Chinese alligator), as an  
32  
33 552 outgroup, were defined using TreeFam (<http://www.treefam.org/>). Phylogenetic trees  
34  
35 553 were then constructed using MrBayes[79] and PhyML [80] with fourfold degenerate  
36  
37 554 (4D) sites of 4,393 single-copy orthologs shared among the 12 species analyzed here.  
38  
39 555 Divergence times were estimated using MCMCTree  
40  
41 556 (<http://abacus.gene.ucl.ac.uk/software/paml.html>) from the PAML package[81]  
42  
43 557 together with three fossil dates from the TimeTree database[82]  
44  
45 558 (<http://www.timetree.org/>) for calibration. Analyses of the expansion and contraction  
46  
47 559 of gene families were carried out using CAFE (Computational Analysis of Gene  
48  
49 560 Family Evolution)[83] using a random birth and death model with a global parameter  
50  
51  
52  
53  
54  
55  
56  
57  
58  
59  
60  
61  
62  
63  
64  
65

1 561  $\lambda$ , which represents the probability of both gain and loss of a gene over a given time  
2  
3 562 interval. Conditional  $p$ -values were calculated and defined as significant at values of  
4  
5  
6 563 less than 0.05. To detect PSGs, the coding sequences of all the single-copy  
7  
8  
9 564 orthologous genes were aligned using PRANK[84] and poorly aligned sites were  
10  
11  
12 565 removed using gBlocks[85]. High-quality alignments were then filtered to estimate  
13  
14 566 the ratios ( $\omega=d_N/d_S$ ) of nonsynonymous nucleotide substitutions ( $d_N$ ) to synonymous  
15  
16  
17 567 nucleotide substitutions ( $d_S$ ) for these genes in the target quail branch ( $\omega_0$ ), other  
18  
19  
20 568 branches ( $\omega_1$ ) or all branches ( $\omega_2$ ) using the codeml program with an improved  
21  
22  
23 569 branch-site model (TEST-II) [86] (model = 2, NSsites = 2) and the maximum  
24  
25  
26 570 likelihood method in the PAML package[81]. TEST-II is a likelihood ratio test that  
27  
28  
29 571 compares a null hypothesis with fixed  $\omega=1$  with model A that allows  $\omega_2>1$  in the  
30  
31  
32 572 foreground lineages. TEST-II can discriminate relaxed selective constraints analysis  
33  
34  
35 573 from positive selection and is a direct test for positive selection on the foreground  
36  
37  
38 574 lineages [87]. Positively selected sites were detected by using Bayes Empirical Bayes  
39  
40  
41 575 (BEB) method [88] which can avoid excessive false positive rate[89].

## 42 576 **Resequencing and SNP calling**

43  
44  
45 577 A total of 71 individuals were chosen for resequencing (see more information  
46  
47  
48 578 regarding samples). Genomic DNAs were isolated and then used to construct Illumina  
49  
50  
51 579 libraries with an insert size of 500bp. Illumina HiSeq 2000 system was used to  
52  
53  
54 580 generate paired-end reads and raw data was filtered by removing reads containing  
55  
56  
57 581 greater than 50% low-quality bases (Q value  $\leq 5$ ), reads containing more than 5%  
58  
59  
60 582 unidentified (N) bases and those with adapter contamination. The clean reads were

1 583 mapped to the assembled reference genome using BWA software v0.7.12[90] with  
2  
3 584 parameters “-m 200000 -o 1 -e 30 -i 15 -L -I -t 4 -n 0.04 -R 20”, and the results were  
4  
5  
6 585 transformed into indexed BAM files using SAMtools v0.1.18[91]. The picard package  
7  
8  
9 586 v1.105 and Genome Analysis Toolkit (GATK, v 3.3-0)[92] were then used for SNP  
10  
11  
12 587 calling. To obtain high-quality SNPs, we: 1) deleted duplicate reads; 2) improved  
13  
14 588 alignments using the IndelRealigner package in GATK; 3) recalibrated base quality  
15  
16  
17 589 scores using the BaseRecalibrator package in GATK; 4) called SNPs using the  
18  
19  
20 590 UnifiedGenotyper package in GATK with a minimum phred-scaled confidence value  
21  
22  
23 591 of 50 and a minimum phred-scaled confidence threshold of 10 for calling variants; 5)  
24  
25  
26 592 assessed variant quality using the VariantRecalibrator and ApplyRecalibration  
27  
28  
29 593 packages with truth sensitivity filter level of 99 in GATK; and 6) filtered SNPs  
30  
31  
32 594 using the VariantFiltration package in GATK with parameters “--filterExpression "QD  
33  
34 595 < 2.0 || MQ < 40.0 || ReadPosRankSum< -8.0 || FS > 60.0 || HaplotypeScore> 13.0 ||  
35  
36 596 MQRankSum< -12.5" -filterNameLowQualFilter -  
37  
38  
39 597 missingValuesInExpressionsShouldEvaluateAsFailing”.

#### 598 **SNP quality control (QC)**

599 The chromosomal variant cell format (VCF) files were transformed into PLINK  
600 format by using VCFtools v0.1.13 (<https://vcftools.github.io/index.html>) and  
601 subsequent analyses were performed by using PLINK v1.07[93]. As the default  
602 chromosome handling type in PLINK is for human (1:22, X, Y), the PLINK files for  
603 male quail (ZZ) and the female quail (WZ) were swapped with each other before data  
604 were analyzed because the heterogametic gender in quail is female. Additionally, the

1 605 command --dog (39n) was added at the beginning of each command line to ensure  
2  
3 606 that all quail chromosomes would be included.  
4  
5

6 607 Individual quality control consisted of the following three steps: 1) determining  
7  
8  
9 608 the sex of individuals, 2) detecting individuals with missing genotypes and 3)  
10  
11  
12 609 identifying duplicate or highly related individuals. Any discordant sex information  
13  
14  
15 610 was checked in terms of the heterozygosity rates on the Z chromosome as described  
16  
17  
18 611 by the  $F$  statistic. That is, any individual quail for which the  $F$ -value was less than 0.8  
19  
20  
21 612 in a male quail (ZZ) or greater than 0.2 in a female quail (ZW) would be removed  
22  
23  
24 613 from the sample set. The missing genotype rate for each individual was set to less  
25  
26  
27 614 than 10% to filter out individuals with unreliable genotype information. Case-control  
28  
29  
30 615 association studies assume that all individuals in a population are unrelated. We used  
31  
32  
33 616 a complete linkage agglomerative clustering method that was based on pairwise  
34  
35  
36 617 identity-by-state (IBS) to identify the genomic similarity of pairs of individuals. Any  
37  
38  
39 618 individual with an IBS greater than 0.9 would be filtered out of the sample set.

40 619 SNP quality control consisted of the following four steps: 1) estimating the  
41  
42  
43 620 missing genotype rate (MGR) for each SNP, 2) determining whether there was a  
44  
45  
46 621 significant difference in the rate of missing SNP genotypes between the case and  
47  
48  
49 622 control groups, 3) filtering out SNPs with very low minor allele frequencies (MAF),  
50  
51  
52 623 and 4) filtering out SNPs with frequencies that deviate significantly from  
53  
54  
55 624 Hardy-Weinberg Equilibrium (HWE). Filtering out the low-quality SNPs helped not  
56  
57  
58 625 only to avoid false-positives, but also to enhance our ability to identify the loci  
59  
60  
61 626 significantly associated with traits. Therefore, the criteria for filtering were



1 627 MGR>0.05, a significant difference in MGR between case and control according to  
2  
3 628 *t*-test, at  $P<0.05$ , MAF<0.05 and a  $P$ -value for deviation from HWE<0.0001.  
4  
5

6 629 Extensive genome-wide regions of high linkage disequilibrium (LD) in quail  
7  
8  
9 630 strongly influenced the results of population structure, principal component and  
10  
11 631 association analyses. Thus, we pruned out the pairwise SNPs with  $r^2$  values of greater  
12  
13  
14 632 than 0.2 in each 50-bp sliding window, and set 10-bp steps for sliding window  
15  
16  
17 633 analysis to ensure 80% overlaps between any two adjacent windows.  
18  
19

### 20 21 634 **Population structure analysis** 22

23  
24 635 The phylogenic tree was constructed using the neighbor joining method in  
25  
26 636 MEGA v6.0[94] based on pairwise distance matrix, which were estimated using IBS  
27  
28  
29 637 distances in PLINK v1.07. Analysis of population stratification was conducted by  
30  
31  
32 638 performing complete linkage clustering of individuals using autosomal genome-wide  
33  
34  
35 639 SNP data in PLINK. Principle component analysis (PCA) was carried out using the  
36  
37  
38 640 smartpca script (<https://github.com/argriffing/eigensoft/blob/master/bin/smartpca.perl>)  
39  
40  
41 641 and the scatter plots were drawn by using R v3.2.2 (<https://www.r-project.org/>). We  
42  
43  
44 642 used ADMIXTURE v1.3[37] to analyze population structure, which uses the  
45  
46  
47 643 likelihood model-based manner from large autosomal SNP genotype datasets. The  
48  
49 644 number of populations ( $K$ ) was set from  $K = 2$  to 7 to obtain the maximum likelihood  
50  
51  
52 645 estimates that would allow us to infer population structure. The cross-validation  
53  
54  
55 646 procedure was performed to exhibit a low cross-validation error, which made it fairly  
56  
57  
58 647 clear that what the optimal  $K$  value was. The parameter standard errors were estimated  
59  
60 648 by using 100 bootstrap replicates. The cross-validation plot was drawn by using R  
61  
62  
63  
64  
65

1 649 v3.3.2. The average LD of a pair of SNPs in a 300-kb sliding window was estimated  
2  
3  
4 650 by using PopLDdecay v2.69 (<https://github.com/BGI-shenzhen/PopLDdecay>), and the  
5  
6 651 LD decay curves for the three populations were drawn by using R v3.3.2.

7  
8  
9 652 **Calculation of Nucleotide diversity and estimation of population differentiation**  
10  
11  
12 653 **using  $F_{ST}$**

13  
14  
15 654 Watterson's estimator  $\theta_w$ [35] and the average number of pairwise differences per  
16  
17 655 sequence estimator  $\pi$ [36] were calculated using in-house Perl scripts. Tajima's  $D$ [36]  
18  
19 656 was estimated using  $\theta_w$ ,  $\pi$  and the number of sequences. We scanned the whole  
20  
21 657 genome to calculate the three estimators by using the 90% overlapped sliding window  
22  
23 658 with size of 100 kb or 50 kb. The fixation index ( $F_{ST}$ ), a measure of population  
24  
25 659 differentiation due to genetic structure[95], was estimated by using VCFtools v0.1.13  
26  
27 660 also with 50-kb and 100-kb 90% overlapped sliding window on a genome-wide scale.  
28  
29  
30  
31  
32  
33

34  
35 661 **Association analysis and conditional haplotype-based association testing**  
36  
37

38 662 The post-QC data was saved as PED format and later was used for GWAS via  
39  
40  
41 663 GEMMA v0.94. The centered relatedness matrix was calculated with the parameter ( $-$   
42  
43 664  $gk$  1). And then, the relatedness matrix was considered as a covariance using a linear  
44  
45 665 mixed model to perform the Wald test, likelihood ratio test and score test. The GWAS  
46  
47 666 results were shown as a Manhattan plot and Q-Q plot and were drawn by using the  
48  
49 667 *qqman* package in R v3.2.2. SNP with the most significant effect on phenotypic  
50  
51 668 variation was regarded as the index SNP, and the flanking 100-kb region of the index  
52  
53 669 SNP was scanned for haplotype construction. In this region, the SNPs with high LD  
54  
55 670 ( $r^2 > 0.7$ ) and significantly associated to plumage color (adjusted  $P < 0.01$ ) were  
56  
57  
58  
59  
60  
61  
62  
63  
64  
65

1 671 grouped into a clump. Then, the SNPs gathered in a clump were extracted by using  
2  
3 672 PLINK v1.07 and transformed into Haploview format for conditional haplotype  
4  
5  
6 673 association testing. The haplotypes in block were estimated with permutation of 5,000,  
7  
8  
9 674 and the LD plot between gene *CDCC171* and *TYRPI* was drawn using Haplotype  
10  
11  
12 675 v4.2[96].  
13

## 14 676 **Molecular experiments**

### 15 677 **(a) Follicle-Stimulation Hormone (FSH) testing by ELISA**

16  
17  
18 678 We selected 100 male quails, 100 female quails, 100 hens and 100 cocks from  
19  
20  
21 679 Hubei in China and they were raised under the same conditions. In four populations,  
22  
23  
24 680 blood samples from 10 individuals were collected every week (0-6 weeks). And then  
25  
26  
27 681 the serums were separated from the blood and stored in -20°C for testing. The *FSH*  
28  
29  
30 682 hormone of quails and chicken were tested using Follicle-Stimulation Hormone (FSH)  
31  
32  
33 683 ELISA Kit (abcam, UK) followed the protocol.  
34  
35  
36

### 37 684 **(b) *CCDC171* transcripts cloning, expression**

38  
39  
40  
41 685 We designed three and four pairs of primers (**Table S20**) to clone transcripts of  
42  
43  
44 686 *CCDC171* in yellow and maroon quails respectively. For researching the differential  
45  
46  
47 687 expression of *CCDC171* in yellow and maroon quail, we collected hair follicle, skin  
48  
49  
50 688 of back and skin of abdomen from three “yellow” quail and three “maroon” quail  
51  
52  
53 689 respectively. Two pairs of primers were designed to detect the differential expression  
54  
55  
56 690 of *CCDC171* by qPCR.  
57

### 58 691 **(c) Validation of SNPs**

1 692 DNA from the different plumage quails was extracted from blood samples  
2  
3 693 following standard molecular biology techniques and stored in -80°C, and used  
4  
5  
6 694 software Primer 6.0 for designing primers to validate the eight SNPs which were  
7  
8  
9 695 significantly associated with plumage color. The PCR products were sequenced by  
10  
11  
12 696 sanger platform

13  
14 697  
15  
16 698 **Additional files**

17  
18  
19 699 **Additional file 1: Figures S1-21, Tables S1-10, Table S16, Tables S18-20.**

20  
21  
22 700 **Additional file 2: Table S11.** Diversity statistics of 31 quails.

23  
24 701 **Additional file 3: Table S12.** The large scale of genomic regions showing reduction  
25  
26  
27 702 of diversity (ROD) between egg-type quail and wild quail at 100-kb overlapping  
28  
29  
30 703 sliding window in 10-kb step.

31  
32  
33 704 **Additional file 4: Table S13.** Functional enrichment for selective sweep regions  
34  
35  
36 705 between egg-type and wild quails.

37  
38 706 **Additional file 5: Table S14.** The large scale of genomic regions showing reduction  
39  
40  
41 707 of diversity (ROD) between meat-type quail and wild quail at 100-kb overlapping  
42  
43  
44 708 sliding window in 10-kb step.

45  
46  
47 709 **Additional file 5: Table S15.** Functional enrichment for selective sweep regions  
48  
49  
50 710 between meat-type and wild quails

51  
52 711 **Additional file 6: Table S17.** Copy numbers of innate immune response-related genes  
53  
54  
55 712 among quail, chicken, turkey and duck.

56  
57  
58 713 **Data availability**

1 714 The assembled genome data is accessible through NCBI BioSample:  
2  
3 715 SAMN05787330 and the resequencing data has been uploaded to  
4  
5  
6 716 NCBI(unpublicized).  
7

### 8 9 717 **Acknowledgements**

10  
11 718 We would like to thank Dr. Leif Andersson, Dr. SangeetLamichhaney, Dr.  
12  
13 719 Susanne Bornelöv and Prof. Maxwell Hinckegave comments for this manuscript. This  
14  
15  
16 720 project was supported by the Agricultural Science and Technology Innovation Center  
17  
18  
19 721 of Hubei (2012tsxk09 and 2014jzxjh02) and the Key Laboratory of Animal Embryo  
20  
21  
22 722 and Molecular Breeding of Hubei (2014-2017 ZD146).  
23  
24

### 25 723 **Authors' contributions**

26  
27  
28 724 Y.W. was responsible for collecting samples for sequencing, carrying out  
29  
30  
31 725 experimental verification and co-drafting the manuscript. Y.Z. made contributions to  
32  
33  
34 726 genome annotation, phylogenetic analysis, immune-related gene analysis, detecting  
35  
36  
37 727 genes under positive selection, SNP calling in re-sequencing data and co-drafting of  
38  
39  
40 728 the manuscript. Z.H. and J.P. designed the scientific objectives and co-drafted  
41  
42  
43 729 manuscript. J.C. carried out SNP quality control, GWAS analysis, detecting selective  
44  
45  
46 730 sweep regions and co-drafting of the manuscript. G.F. participated in genome  
47  
48  
49 731 assembly, analyzing inversions and co-drafting of the manuscript. W.C., X.C., J.J.,  
50  
51  
52 732 X.F. and X.X. participated in project management and manuscript revision. H.L., J.S.,  
53  
54  
55 733 A.P., Y.P., Z.L., H.Z., J.S., C.Z., H.T., H.X. and C.L. worked on sample preparation  
56  
57  
58 734 and experimental verification. H.Z., T.Y., B.W., H.Y. and M.B. took part in data  
59  
60  
61 735 processing. D.B. and W.W. provided suggestions and revised the manuscript. N.Y.,  
62  
63  
64  
65

1 736 X.L. and J.D. designed this project, provided suggestions and revised the manuscript.  
2

3 737 **Competing interests**  
4

5 738 The authors declare that they have no competing interests.  
6

7 739 **Author details**  
8

9 740 <sup>1</sup>Institute of Animal Husbandry and Veterinary, Hubei Academy of Agricultural  
10  
11  
12 741 Science, Wuhan 430064, China  
13

14 742 <sup>2</sup>BGI-Shenzhen, Shenzhen 518083, China  
15

16  
17  
18 743 <sup>3</sup>Hubei Key Laboratory of Animal Embryo and Molecular Breeding, Wuhan 430064,  
19  
20 744 China  
21

22  
23 745 <sup>4</sup>National Engineering Laboratory for Animal Breeding and MOA Key Laboratory of  
24  
25 746 Animal Genetics and Breeding, China Agricultural University, Beijing 100193, China  
27

28 747 <sup>5</sup>Hubei Shendan Healthy Food Co., Ltd., Wuhan 430206, China  
29

30  
31 748 <sup>6</sup>School of Life Science and Technology, University of Electronic Science and  
32  
33 749 Technology of China, Chengdu 610054, China  
34  
35

36  
37 750 <sup>7</sup>State Key Laboratory of Quality Research in Chinese Medicine and Institute of  
38  
39 751 Chinese Medical Sciences, Macao, China  
41

42 752 <sup>8</sup>The Roslin Institute and Royal (Dick) School of Veterinary Studies, University of  
43  
44 753 Edinburgh, Midlothian EH25 9RG, UK  
45  
46

47 754 <sup>9</sup>Kunming Institute of Zoology, Chinese Academy of Sciences (CAS), Kunming,  
48  
49 755 China  
50  
51

52  
53 756 <sup>10</sup>China National GeneBank-Shenzhen, BGI-Shenzhen, Shenzhen 518083, China  
54  
55

56 757 <sup>11</sup>James D. Watson Institute of Genome Sciences, Hangzhou 310058, China  
57

58  
59 758 \*These authors contributed equally to this work.  
60

1  
2  
3  
4  
5  
6  
7  
8  
9  
10  
11  
12  
13  
14  
15  
16  
17  
18  
19  
20  
21  
22  
23  
24  
25  
26  
27  
28  
29  
30  
31  
32  
33  
34  
35  
36  
37  
38  
39  
40  
41  
42  
43  
44  
45  
46  
47  
48  
49  
50  
51  
52  
53  
54  
55  
56  
57  
58  
59  
60  
61  
62  
63  
64  
65

759 †Correspondence should be addressed to Jinping Du (ddjinpin@163.com), Xin Liu  
760 (liuxin@genomics.cn) Ning Yang (nyang@cau.edu.cn) or ZhuoCheng Hou  
761 (zchou@cau.edu.cn).  
762

1 763 **Figure legends**

2 764 **Figure 1. Chromosomes of quail.** (a) Gene and TE density of each quail  
3 chromosome. (b) Comparison of the chromosome lengths of quail and chicken.  
4  
5

6 766  
7  
8 767 **Figure 2. Comparative evolutionary analysis of 12 avian species.** (a) The  
9 phylogenetic tree of *Coturnix japonica* (quail), *Gallus gallus* (chicken), *Anas*  
10 *platyrhynchos* (duck), *Columba livia*(pigeon), *Falco cherrug* (Saker falcon), *Falco*  
11 *peregrinus* (Peregrine falcon), *Ficedula albicollis* (collared flycatcher), *Geospiza*  
12 *fortis* (medium ground finch), *Meleagris gallopavo* (turkey), *Pseudopodoces*  
13 *humilis*(ground tit), *Taeniopygia guttata* (zebra finch), with *Alligator sinensis*  
14 (Chinese alligator) as an outgroup. (b) Syntenic relationships between the quail and  
15 chicken genomes. (c) An inversion detected in chromosome Z between quail and  
16 chicken.  
17  
18  
19  
20  
21  
22  
23  
24  
25  
26  
27  
28

29 777 **Figure 3. Analyses of the phylogenetic relationships, population structure, LD**  
30 **decay and genetic diversity between wild and domesticated quail.** (a)  
31 Evolutionary history was inferred using the Neighbor-Joining method in MEGA 6.0.  
32  
33 779 (b) Principle component analysis of wild quail and domesticated quail. (c) LD decay  
34 curves were estimated by squared pairwise correlations of alleles against physical  
35 distance in wild quail, egg-type quail and meat-type quail, respectively. (d) Population  
36 structure analysis with the maximum likelihood score for the model  $K = 2$ . (e)  
37 Nucleotide diversity between wild quail and egg-type quail across chromosome Z.  
38 Both the wild quail (red line) and the egg-type quail (green line) showed of the  
39 difference of diversity on chromosome Z. Plotting of Tajima's  $D$  for the egg-type  
40 group (blue line) in a 100-kb sliding window in 10-kb steps revealed the selective  
41 signal on chromosome Z. Likewise, plotting Weir's  $F_{st}$  (black line) on chromosome Z  
42 indicates the level of differentiation between the wild group and the egg-type group.  
43  
44 784 Both of gene *CCDC171* and *TYRP1* were located within a selective sweep region  
45 (from ~21.5 Mb to 23.2 Mb), in which the positive signal was detected in the egg-type  
46 group. However, they exhibited a weak linkage due to the location on the different  
47  
48  
49  
50  
51  
52  
53  
54  
55  
56  
57  
58  
59  
60  
61  
62  
63  
64  
65



1 793 haplotype blocks.

2 794

3  
4 795 **Figure 4. Genes related to early sexual maturity and immune system function in**  
5 **quail and another avian species.** (a) Positions of amino acids under positive  
6 796 selection in the follicle stimulating hormone beta (FSH $\beta$ ) protein. (b) Location of two  
7 797 amino acids under positive selection on the predicted 3D structure of the FSH $\beta$   
8 798 protein. (c) Circulating FSH $\beta$  levels in blood during early development stages of quail  
9 799 and chicken for 6 weeks. (d) Phylogenetic tree of Immunoglobulin-like and  
10 800 Immunoglobulin subtype proteins of quail, chicken, duck, turkey and zebra finch.  
11 801

12 802

13 803 **Figure 5. GWAS analysis of quail plumage color.** (a) Manhattan plot of each  
14 804 chromosome showing the GWAS results for quail plumage color. (b) Validation of  
15 805 eight candidate SNPs in 200 random individual quail. (c) The clones of *CCDC171*  
16 806 gene transcripts from quail with “yellow” and “maroon” plumage.

17 807

## 18 808 **Tables**

19 809 **Table 1 Statistics of SNPs in whole genome and genic regions of wild and domesticated quail**

20 810

21 811

22 812

23 813

24 814

25 815

26 816

27 817

28 818

29 819

30 820

31 821

32 822

33 823

34 824

35 825

36 826

37 827

38 828

39 829

813

1  
2 **814 References**

- 3  
4 815 1. Dalloul RA, Long JA, Zimin AV, Aslam L, Beal K, Blomberg LA, et al. Multi-platform next-generation  
5 816 sequencing of the domestic turkey (*Meleagris gallopavo*): genome assembly and analysis. *PLoS Biol.*  
6 817 2010;8 9:e1000475.  
7 818 2. Wallis JW, Aerts J, Groenen MA, Crooijmans RP, Layman D, Graves TA, et al. A physical map of the  
8 819 chicken genome. *Nature.* 2004;432 7018:761-4.  
9  
10 820 3. Kawahara-Miki R, Sano S, Nunome M, Shimmura T, Kuwayama T, Takahashi S, et al.  
11 821 Next-generation sequencing reveals genomic features in the Japanese quail. *Genomics.* 2013;101  
12 822 6:345-53.  
13  
14 823 4. Jetz W, Thomas G, Joy J, Hartmann K and Mooers A. The global diversity of birds in space and time.  
15 824 *Nature.* 2012;491 7424:444-8.  
16  
17 825 5. Slack KE, Jones CM, Ando T, Harrison GA, Fordyce RE, Arnason U, et al. Early penguin fossils, plus  
18 826 mitochondrial genomes, calibrate avian evolution. *Mol Biol Evol.* 2006;23 6:1144-55.  
19  
20 827 6. van Tuinen M and Dyke GJ. Calibration of galliform molecular clocks using multiple fossils and  
21 828 genetic partitions. *Mol Phylogenet Evol.* 2004;30 1:74-86.  
22  
23 829 7. van Tuinen M and Hedges SB. Calibration of avian molecular clocks. *Mol Biol Evol.* 2001;18  
24 830 2:206-13.  
25  
26 831 8. Kayang BB, Fillon V, Inoue-Murayama M, Miwa M, Leroux S, Fève K, et al. Integrated maps in quail  
27 832 (*Coturnix japonica*) confirm the high degree of synteny conservation with chicken (*Gallus gallus*)  
28 833 despite 35 million years of divergence. *BMC Genomics.* 2006;7 1:1.  
29  
30 834 9. Shibusawa M, Minai S, Nishida-Umehara C, Suzuki T, Mano T, Yamada K, et al. A comparative  
31 835 cytogenetic study of chromosome homology between chicken and Japanese quail. *Cytogenet*  
32 836 *Genome Res.* 2002;95 1-2:103-9.  
33  
34 837 10. Hazard D, Couty M, Faure J and Guémené D. Relationship between hypothalamic-pituitary-adrenal  
35 838 axis responsiveness and age, sexual maturity status, and sex in Japanese quail selected for long or  
36 839 short duration of tonic immobility. *Poult Sci.* 2005;84 12:1913-9.  
37  
38 840 11. Siopes T. Initiation of egg production by turkey breeder hens: Sexual maturation and age at lighting.  
39 841 *Poult Sci.* 2010;89 7:1490-6.  
40  
41 842 12. Caetano-Anolles K, Seo M, Rodriguez-Zas S, Oh J-D, Han JY, Lee K, et al. Comprehensive  
42 843 Identification of Sexual Dimorphism-Associated Differentially Expressed Genes in Two-Way  
43 844 Factorial Designed RNA-Seq Data on Japanese Quail (*Coturnix coturnix japonica*). *PLoS ONE.*  
44 845 2015;10 9:e0139324.  
45  
46 846 13. Ricklefs R. Patterns of growth in birds. II. Growth rate and mode of development. *Ibis.* 1973;115  
47 847 2:177-201.  
48  
49 848 14. Cécilia H, Catherine Gh, Sophie L and Jean - Pierre R. Daily organization of laying in Japanese and  
50 849 European quail: Effect of domestication. *J Exp Zool A Comp Exp Biol.* 2004;301 2:186-94.  
51  
52 850 15. Mills AD, Crawford LL, Domjan M and Faure JM. The behavior of the Japanese or domestic quail  
53 851 *Coturnix japonica*. *Neurosci Biobehav Rev.* 1997;21 3:261-81.  
54  
55 852 16. Andersson MB. Sexual selection. Princeton University Press; 1994.  
56  
57 853 17. Hill G and McGraw K. Bird coloration. Function and evolution, vol. 2. Cambridge, MA: Harvard  
58 854 University Press, 2006.  
59  
60 855 18. Theron E, Hawkins K, Bermingham E, Ricklefs RE and Mundy NI. The molecular basis of an avian  
61 856 plumage polymorphism in the wild: a melanocortin-1-receptor point mutation is perfectly

- 857 associated with the melanic plumage morph of the bananaquit, *Coereba flaveola*. *Curr Biol.*  
858 2001;11 8:550-7.
- 859 19. Mundy NI, Badcock NS, Hart T, Scribner K, Janssen K and Nadeau NJ. Conserved genetic basis of a  
860 quantitative plumage trait involved in mate choice. *Science.* 2004;303 5665:1870-3.
- 861 20. Nadeau NJ, Burke T and Mundy NI. Evolution of an avian pigmentation gene correlates with a  
862 measure of sexual selection. *Proc R Soc Lond B Biol Sci.* 2007;274 1620:1807-13.
- 863 21. Ottinger MA, Abdelnabi M, Li Q, Chen K, Thompson N, Harada N, et al. The Japanese quail: a  
864 model for studying reproductive aging of hypothalamic systems. *Exp Gerontol.* 2004;39  
865 11:1679-93.
- 866 22. Yasuo S, Ebihara S and Yoshimura T. Circadian expression of clock gene in the optic tectum of  
867 Japanese quail. *Brain Res.* 2004;1005 1:193-6.
- 868 23. Creuzet S, Schuler B, Couly G and Le Douarin NM. Reciprocal relationships between *Fgf8* and  
869 neural crest cells in facial and forebrain development. *Proc Natl Acad Sci U S A.* 2004;101  
870 14:4843-7.
- 871 24. Nain S, Bour A, Chalmers C and Smits J. Immunotoxicity and disease resistance in Japanese quail  
872 (*Coturnix coturnix japonica*) exposed to malathion. *Ecotoxicology.* 2011;20 4:892-900.
- 873 25. Kimball RT and Braun EL. Does more sequence data improve estimates of galliform phylogeny?  
874 Analyses of a rapid radiation using a complete data matrix. *PeerJ.* 2014;2:e361.
- 875 26. Pereira SL and Baker AJ. A molecular timescale for galliform birds accounting for uncertainty in  
876 time estimates and heterogeneity of rates of DNA substitutions across lineages and sites. *Mol*  
877 *Phylogenet Evol.* 2006;38 2:499-509.
- 878 27. Kaiser VB, van Tuinen M and Ellegren H. Insertion events of CR1 retrotransposable elements  
879 elucidate the phylogenetic branching order in galliform birds. *Mol Biol Evol.* 2007;24 1:338-47.
- 880 28. Guan X, Silva P, Gyenai KB, Xu J, Geng T, Tu Z, et al. The mitochondrial genome sequence and  
881 molecular phylogeny of the turkey, *Meleagris gallopavo*. *Anim Genet.* 2009;40 2:134-41.
- 882 29. Luo R, Liu B, Xie Y, Li Z, Huang W, Yuan J, et al. SOAPdenovo2: an empirically improved  
883 memory-efficient short-read de novo assembler. *GigaScience.* 2012;1 1:1.
- 884 30. Recoquillay J, Pitel F, Arnould C, Leroux S, Dehais P, Moréno C, et al. A medium density genetic map  
885 and QTL for behavioral and production traits in Japanese quail. *BMC Genomics.* 2015;16 1:1.
- 886 31. Zhang G, Li C, Li Q, Li B, Larkin DM, Lee C, et al. Comparative genomics reveals insights into avian  
887 genome evolution and adaptation. *Science.* 2014;346 6215:1311-20.
- 888 32. Nadeau N, Mundy N, Gourichon D and Minvielle F. Association of a single - nucleotide substitution  
889 in *TYRP1* with roux in Japanese quail (*Coturnix japonica*). *Anim Genet.* 2007;38 6:609-13.
- 890 33. Aslam ML, Bastiaansen JW, Elferink MG, Megens H-J, Crooijmans RP, Blomberg LA, et al. Whole  
891 genome SNP discovery and analysis of genetic diversity in Turkey (*Meleagris gallopavo*). *BMC*  
892 *genomics.* 2012;13 1:391.
- 893 34. Guo X, Fang Q, Ma C, Zhou B, Wan Y and Jiang R. Whole-genome resequencing of Xishuangbanna  
894 fighting chicken to identify signatures of selection. *Genetics Selection Evolution.* 2016;48 1:62.
- 895 35. Watterson G. On the number of segregating sites in genetical models without recombination.  
896 *Theoretical population biology.* 1975;7 2:256-76.
- 897 36. Tajima F. Evolutionary relationship of DNA sequences in finite populations. *Genetics.* 1983;105  
898 2:437-60.
- 899 37. Alexander DH, Novembre J and Lange K. Fast model-based estimation of ancestry in unrelated  
900 individuals. *Genome research.* 2009;19 9:1655-64.

- 1 901 38. Balakrishnan CN and Edwards SV. Nucleotide variation, linkage disequilibrium and  
2 902 founder-facilitated speciation in wild populations of the zebra finch (*Taeniopygia guttata*). *Genetics*.  
3 903 2009;181 2:645-60.
- 4 904 39. Li M-H and Merilä J. Sex-specific population structure, natural selection, and linkage disequilibrium  
5 905 in a wild bird population as revealed by genome-wide microsatellite analyses. *BMC Evol Biol*.  
6 906 2010;10 1:1.
- 7 907 40. Charlesworth B, Morgan M and Charlesworth D. The effect of deleterious mutations on neutral  
8 908 molecular variation. *Genetics*. 1993;134 4:1289-303.
- 9 909 41. Zeng K, Fu Y-X, Shi S and Wu C-I. Statistical tests for detecting positive selection by utilizing  
10 910 high-frequency variants. *Genetics*. 2006;174 3:1431-9.
- 11 911 42. Zeng K, Shi S and Wu C-I. Compound tests for the detection of hitchhiking under positive selection.  
12 912 *Molecular biology and evolution*. 2007;24 8:1898-908.
- 13 913 43. Ukena K, Ubuka T and Tsutsui K. Distribution of a novel avian gonadotropin-inhibitory hormone in  
14 914 the quail brain. *Cell and tissue research*. 2003;312 1:73-9.
- 15 915 44. Andrew A, Rawdon BB and Alison BC. Failure of insulin cells to develop in cultured embryonic chick  
16 916 pancreas: a model system for the detection of factors supporting insulin cell differentiation. In  
17 917 *Vitro Cellular & Developmental Biology-Animal*. 1994;30 10:664-70.
- 18 918 45. Kee AJ, Gunning PW and Hardeman EC. Diverse roles of the actin cytoskeleton in striated muscle.  
19 919 *Journal of muscle research and cell motility*. 2009;30 5-6:187.
- 20 920 46. Ipek A and Dikmen BY. The relationship between growth traits and egg weight in pheasants (*P.*  
21 921 *colchicus*). *Journal of Biological and Environmental Sciences*. 2007;1 3.
- 22 922 47. Xu Y, Zhang X-H and Pang Y-Z. Association of Tyrosinase (TYR) and Tyrosinase-related Protein 1  
23 923 (TYRP1) with Melanic Plumage Color in Korean Quails (*Coturnix coturnix*). *Asian-Australasian*  
24 924 *Journal of Animal Sciences*. 2013;26 11:1518-22. doi:10.5713/ajas.2013.13162.
- 25 925 48. YU J, YAN L, CHEN Z, LI H, YING S, ZHU H, et al. Investigating right ovary degeneration in chick  
26 926 embryos by transcriptome sequencing. *Journal of Reproduction and Development*. 2017:2016-134.
- 27 927 49. Yoshimura Y and Nishikori M. Identification of apoptotic oocytes in the developing ovary of  
28 928 embryonic and post-hatched chicks in Japanese quail (*Coturnix japonica*). *The Journal of Poultry*  
29 929 *Science*. 2004;41 1:64-8.
- 30 930 50. Shen S-T and Yu JY-L. Cloning and gene expression of a cDNA for the chicken follicle-stimulating  
31 931 hormone (FSH)- $\beta$ -subunit. *General and comparative endocrinology*. 2002;125 3:375-86.
- 32 932 51. Wang Y, Fortin J, Lamba P, Bonomi M, Persani L, Roberson MS, et al. Activator protein-1 and smad  
33 933 proteins synergistically regulate human follicle-stimulating hormone beta-promoter activity.  
34 934 *Endocrinology*. 2008;149 11:5577-91. doi:10.1210/en.2008-0220.
- 35 935 52. Apter D. Development of the hypothalamic-pituitary-ovarian axis. *Ann N Y Acad Sci*.  
36 936 1997;816:9-21.
- 37 937 53. Jiang X, Liu H, Chen X, Chen P-H, Fischer D, Sriraman V, et al. Structure of follicle-stimulating  
38 938 hormone in complex with the entire ectodomain of its receptor. *Proceedings of the National*  
39 939 *Academy of Sciences*. 2012;109 31:12491-6.
- 40 940 54. Suh P-G, Park J-I, Manzoli L, Cocco L, Peak JC, Katan M, et al. Multiple roles of  
41 941 phosphoinositide-specific phospholipase C isozymes. 2008.
- 42 942 55. Kiesel L, Przylipiak A, Emig E, Rabe T and Runnebaum B. Stimulation of gonadotropin release by  
43 943 arachidonic acid and its lipoxigenase metabolites in superfused pituitary cells. *Life Sci*. 1987;40  
44 944 9:847-51.

- 1 945 56. Alder JK, Georgantas RW, Hildreth RL, Kaplan IM, Morisot S, Yu X, et al. Kruppel-like factor 4 is  
2 946 essential for inflammatory monocyte differentiation in vivo. *J Immunol.* 2008;180 8:5645-52.
- 3 947 57. Luo W-W, Lian H, Zhong B, Shu H-B and Li S. Krüppel-like factor 4 negatively regulates cellular  
4 948 antiviral immune response. *Cell Mol Immunol.* 2016;13 1:65-72.
- 5 949 58. Chen G, Wan H, Luo F, Zhang L, Xu Y, Lewkowich I, et al. Foxa2 programs Th2 cell-mediated innate  
6 950 immunity in the developing lung. *J Immunol.* 2010;184 11:6133-41.
- 7 951 59. Aki D, Zhang W and Liu YC. The E3 ligase Itch in immune regulation and beyond. *Immunol Rev.*  
8 952 2015;266 1:6-26.
- 9 953 60. Daumke O and Knittler MR. Functional asymmetry of the ATP - binding - cassettes of the ABC  
10 954 transporter TAP is determined by intrinsic properties of the nucleotide binding domains. *Eur J*  
11 955 *Biochem.* 2001;268 17:4776-86.
- 12 956 61. Fulton JE, Thacker EL, Bacon LD and Hunt HD. Functional analysis of avian class I (BFIV)  
13 957 glycoproteins by epitope tagging and mutagenesis in vitro. *Eur J Immunol.* 1995;25 7:2069-76.
- 14 958 62. Zhou X and Stephens M. Genome-wide efficient mixed-model analysis for association studies. *Nat*  
15 959 *Genet.* 2012;44 7:821-4.
- 16 960 63. Minvielle F, Cecchi T, Passamonti P, Gourichon D and Renieri C. Plumage colour mutations and  
17 961 melanins in the feathers of the Japanese quail: a first comparison. *Animal genetics.* 2009;40  
18 962 6:971-4.
- 19 963 64. Nishiwaki-Ohkawa T and Yoshimura T. Molecular basis for regulating seasonal reproduction in  
20 964 vertebrates. *J Endocrinol.* 2016;229 3:R117-27. doi:10.1530/JOE-16-0066.
- 21 965 65. Wang N, Kimball RT, Braun EL, Liang B and Zhang Z. Assessing phylogenetic relationships among  
22 966 Galliformes: a multigene phylogeny with expanded taxon sampling in Phasianidae. *PLoS One.*  
23 967 2013;8 5:e64312.
- 24 968 66. Jarvis ED, Mirarab S, Aberer AJ, Li B, Houde P, Li C, et al. Whole-genome analyses resolve early  
25 969 branches in the tree of life of modern birds. *Science.* 2014;346 6215:1320-31.  
26 970 doi:10.1126/science.1253451.
- 27 971 67. Tarailo - Graovac M and Chen N. Using RepeatMasker to identify repetitive elements in genomic  
28 972 sequences. *Current Protocols in Bioinformatics.* 2009;4.10. 1-4.. 4.
- 29 973 68. Jurka J, Kapitonov VV, Pavlicek A, Klonowski P, Kohany O and Walichiewicz J. Repbase Update, a  
30 974 database of eukaryotic repetitive elements. *Cytogenet Genome Res.* 2005;110 1-4:462-7.
- 31 975 69. Xu Z and Wang H. LTR\_FINDER: an efficient tool for the prediction of full-length LTR  
32 976 retrotransposons. *Nucleic Acids Res.* 2007;35 suppl 2:W265-W8.
- 33 977 70. Benson G. Tandem repeats finder: a program to analyze DNA sequences. *Nucleic Acids Res.*  
34 978 1999;27 2:573.
- 35 979 71. Aken BL, Ayling S, Barrell D, Clarke L, Curwen V, Fairley S, et al. The Ensembl gene annotation  
36 980 system. *Database : the journal of biological databases and curation.* 2016;2016  
37 981 doi:10.1093/database/baw093.
- 38 982 72. Kent WJ. BLAT--the BLAST-like alignment tool. *Genome research.* 2002;12 4:656-64.  
39 983 doi:10.1101/gr.229202. Article published online before March 2002.
- 40 984 73. Birney E, Clamp M and Durbin R. GeneWise and genomewise. *Genome Res.* 2004;14 5:988-95.
- 41 985 74. Stanke M, Keller O, Gunduz I, Hayes A, Waack S and Morgenstern B. AUGUSTUS: ab initio  
42 986 prediction of alternative transcripts. *Nucleic Acids Res.* 2006;34 suppl 2:W435-W9.
- 43 987 75. Burge C and Karlin S. Prediction of complete gene structures in human genomic DNA. *J Mol Biol.*  
44 988 1997;268 1:78-94.

1 989 76. Trapnell C, Pachter L and Salzberg SL. TopHat: discovering splice junctions with RNA-Seq.  
2 990 Bioinformatics. 2009;25 9:1105-11.  
3 991 77. Trapnell C, Williams BA, Pertea G, Mortazavi A, Kwan G, Van Baren MJ, et al. Transcript assembly  
4 992 and quantification by RNA-Seq reveals unannotated transcripts and isoform switching during cell  
5 993 differentiation. Nat Biotechnol. 2010;28 5:511-5.  
6 994 78. Elisk CG, Mackey AJ, Reese JT, Milshina NV, Roos DS and Weinstock GM. Creating a honey bee  
7 995 consensus gene set. Genome Biol. 2007;8 1:1.  
8 996 79. Ronquist F, Teslenko M, van der Mark P, Ayres DL, Darling A, Höhna S, et al. MrBayes 3.2: efficient  
9 997 Bayesian phylogenetic inference and model choice across a large model space. Syst Biol. 2012;61  
10 998 3:539-42.  
11 999 80. Guindon S, Delsuc F, Dufayard J-F and Gascuel O. Estimating maximum likelihood phylogenies with  
12 1000 PhyML. Bioinformatics for DNA sequence analysis. 2009:113-37.  
13 1001 81. Yang Z. PAML: a program package for phylogenetic analysis by maximum likelihood. CABIOS 13,  
14 1002 555–556. Supplementary material The following supplementary material is available for this article  
15 1003 online: Fig S. 1997;1.  
16 1004 82. Hedges SB, Dudley J and Kumar S. TimeTree: a public knowledge-base of divergence times among  
17 1005 organisms. Bioinformatics. 2006;22 23:2971-2.  
18 1006 83. De Bie T, Cristianini N, Demuth JP and Hahn MW. CAFE: a computational tool for the study of gene  
19 1007 family evolution. Bioinformatics. 2006;22 10:1269-71.  
20 1008 84. Löytynoja A. Phylogeny-aware alignment with PRANK. Multiple Sequence Alignment Methods.  
21 1009 2014:155-70.  
22 1010 85. Talavera G and Castresana J. Improvement of phylogenies after removing divergent and  
23 1011 ambiguously aligned blocks from protein sequence alignments. Syst Biol. 2007;56 4:564-77.  
24 1012 86. Zhao H, Yang J-R, Xu H and Zhang J. Pseudogenization of the umami taste receptor gene Tas1r1 in  
25 1013 the giant panda coincided with its dietary switch to bamboo. Mol Biol Evol. 2010;27 12:2669-73.  
26 1014 87. Yang Z. PAML 4: phylogenetic analysis by maximum likelihood. Molecular biology and evolution.  
27 1015 2007;24 8:1586-91.  
28 1016 88. Zhang J, Nielsen R and Yang Z. Evaluation of an improved branch-site likelihood method for  
29 1017 detecting positive selection at the molecular level. Molecular biology and evolution. 2005;22  
30 1018 12:2472-9.  
31 1019 89. Suzuki Y and Nei M. False-positive selection identified by ML-based methods: examples from the  
32 1020 Sig1 gene of the diatom *Thalassiosira weissflogii* and the tax gene of a human T-cell lymphotropic  
33 1021 virus. Molecular Biology and Evolution. 2004;21 5:914-21.  
34 1022 90. Li H and Durbin R. Fast and accurate short read alignment with Burrows–Wheeler transform.  
35 1023 Bioinformatics. 2009;25 14:1754-60.  
36 1024 91. Li H, Handsaker B, Wysoker A, Fennell T, Ruan J, Homer N, et al. The sequence alignment/map  
37 1025 format and SAMtools. Bioinformatics. 2009;25 16:2078-9.  
38 1026 92. McKenna A, Hanna M, Banks E, Sivachenko A, Cibulskis K, Kernytsky A, et al. The Genome Analysis  
39 1027 Toolkit: a MapReduce framework for analyzing next-generation DNA sequencing data. Genome Res.  
40 1028 2010;20 9:1297-303.  
41 1029 93. Purcell S, Neale B, Todd-Brown K, Thomas L, Ferreira MA, Bender D, et al. PLINK: a tool set for  
42 1030 whole-genome association and population-based linkage analyses. Am J Hum Genet. 2007;81  
43 1031 3:559-75.  
44 1032 94. Tamura K, Stecher G, Peterson D, Filipski A and Kumar S. MEGA6: molecular evolutionary genetics

1033 analysis version 6.0. Mol Biol Evol. 2013;30 12:2725-9.  
1 1034 95. Weir BS and Cockerham CC. Estimating F-statistics for the analysis of population structure.  
2 evolution. 1984;1358-70.  
3 1035  
4 1036 96. Barrett JC, Fry B, Maller J and Daly MJ. Haploview: analysis and visualization of LD and haplotype  
5 1037 maps. Bioinformatics. 2005;21 2:263-5.  
6  
7 1038  
8  
9  
10  
11  
12  
13  
14  
15  
16  
17  
18  
19  
20  
21  
22  
23  
24  
25  
26  
27  
28  
29  
30  
31  
32  
33  
34  
35  
36  
37  
38  
39  
40  
41  
42  
43  
44  
45  
46  
47  
48  
49  
50  
51  
52  
53  
54  
55  
56  
57  
58  
59  
60  
61  
62  
63  
64  
65

**Table 1 Statistics of SNPs in whole genome and genic regions of wild and domesticated quail**

| Whole genome    |                |                     |                          |                   |                     |                     |                          |                   |
|-----------------|----------------|---------------------|--------------------------|-------------------|---------------------|---------------------|--------------------------|-------------------|
| Autosomes       | Number of SNPs | $\pi$ ( $10^{-3}$ ) | $\theta_w$ ( $10^{-3}$ ) | Tajima's <i>D</i> | Non-synonymous SNPs | Synonymous SNPs     | Nonsyn/Syn               |                   |
| Wild quail      | 15,163,308     | 5.139               | 7.052                    | -1.123            | 61,682              | 173,409             | 0.36                     |                   |
| Egg-type quail  | 12,580,606     | 5.125               | 4.249                    | 0.825             | 53,119              | 132,347             | 0.40                     |                   |
| Meat-type quail | 13,763,901     | 5.493               | 4.823                    | 0.544             | 58,481              | 147,227             | 0.40                     |                   |
| Chromosome Z    |                |                     |                          |                   |                     |                     |                          |                   |
| Wild quail      | 409,767        | 1.646               | 3.311                    | -2.213            | 1,528               | 2,797               | 0.55                     |                   |
| Egg-type quail  | 141,783        | 0.732               | 0.798                    | -0.449            | 560                 | 921                 | 0.61                     |                   |
| Meat-type quail | 343,645        | 1.848               | 1.741                    | 0.180             | 1,288               | 2,196               | 0.59                     |                   |
| Total           | 21,886,307     |                     |                          |                   | 90,031              | 229,019             | 0.39                     |                   |
| Genic regions   |                |                     |                          |                   |                     |                     |                          |                   |
| Exon            |                |                     |                          | Intron            |                     |                     |                          |                   |
| Autosomes       | Number of SNPs | $\pi$ ( $10^{-3}$ ) | $\theta_w$ ( $10^{-3}$ ) | Tajima's <i>D</i> | Number of SNPs      | $\pi$ ( $10^{-3}$ ) | $\theta_w$ ( $10^{-3}$ ) | Tajima's <i>D</i> |
| Wild quail      | 235,091        | 2.729               | 3.472                    | -0.878            | 6,470,391           | 5.142               | 6.650                    | -0.935            |
| Egg-type quail  | 185,466        | 3.154               | 3.379                    | -0.276            | 5,339,318           | 6.077               | 6.318                    | -0.256            |
| Meat-type quail | 205,708        | 3.114               | 3.472                    | -0.402            | 5,851,802           | 6.014               | 6.650                    | -0.416            |
| Chromosome Z    |                |                     |                          |                   |                     |                     |                          |                   |
| Wild quail      | 4,325          | 1.031               | 2.013                    | -1.967            | 167,808             | 2.115               | 4.393                    | -2.134            |
| Egg-type quail  | 1,481          | 1.116               | 1.960                    | -1.694            | 56,617              | 2.304               | 4.277                    | -1.852            |
| Meat-type quail | 3,484          | 1.311               | 2.014                    | -1.341            | 138,653             | 2.826               | 4.394                    | -1.406            |
| Total           | 319,052        |                     |                          |                   | 8,929,259           |                     |                          |                   |



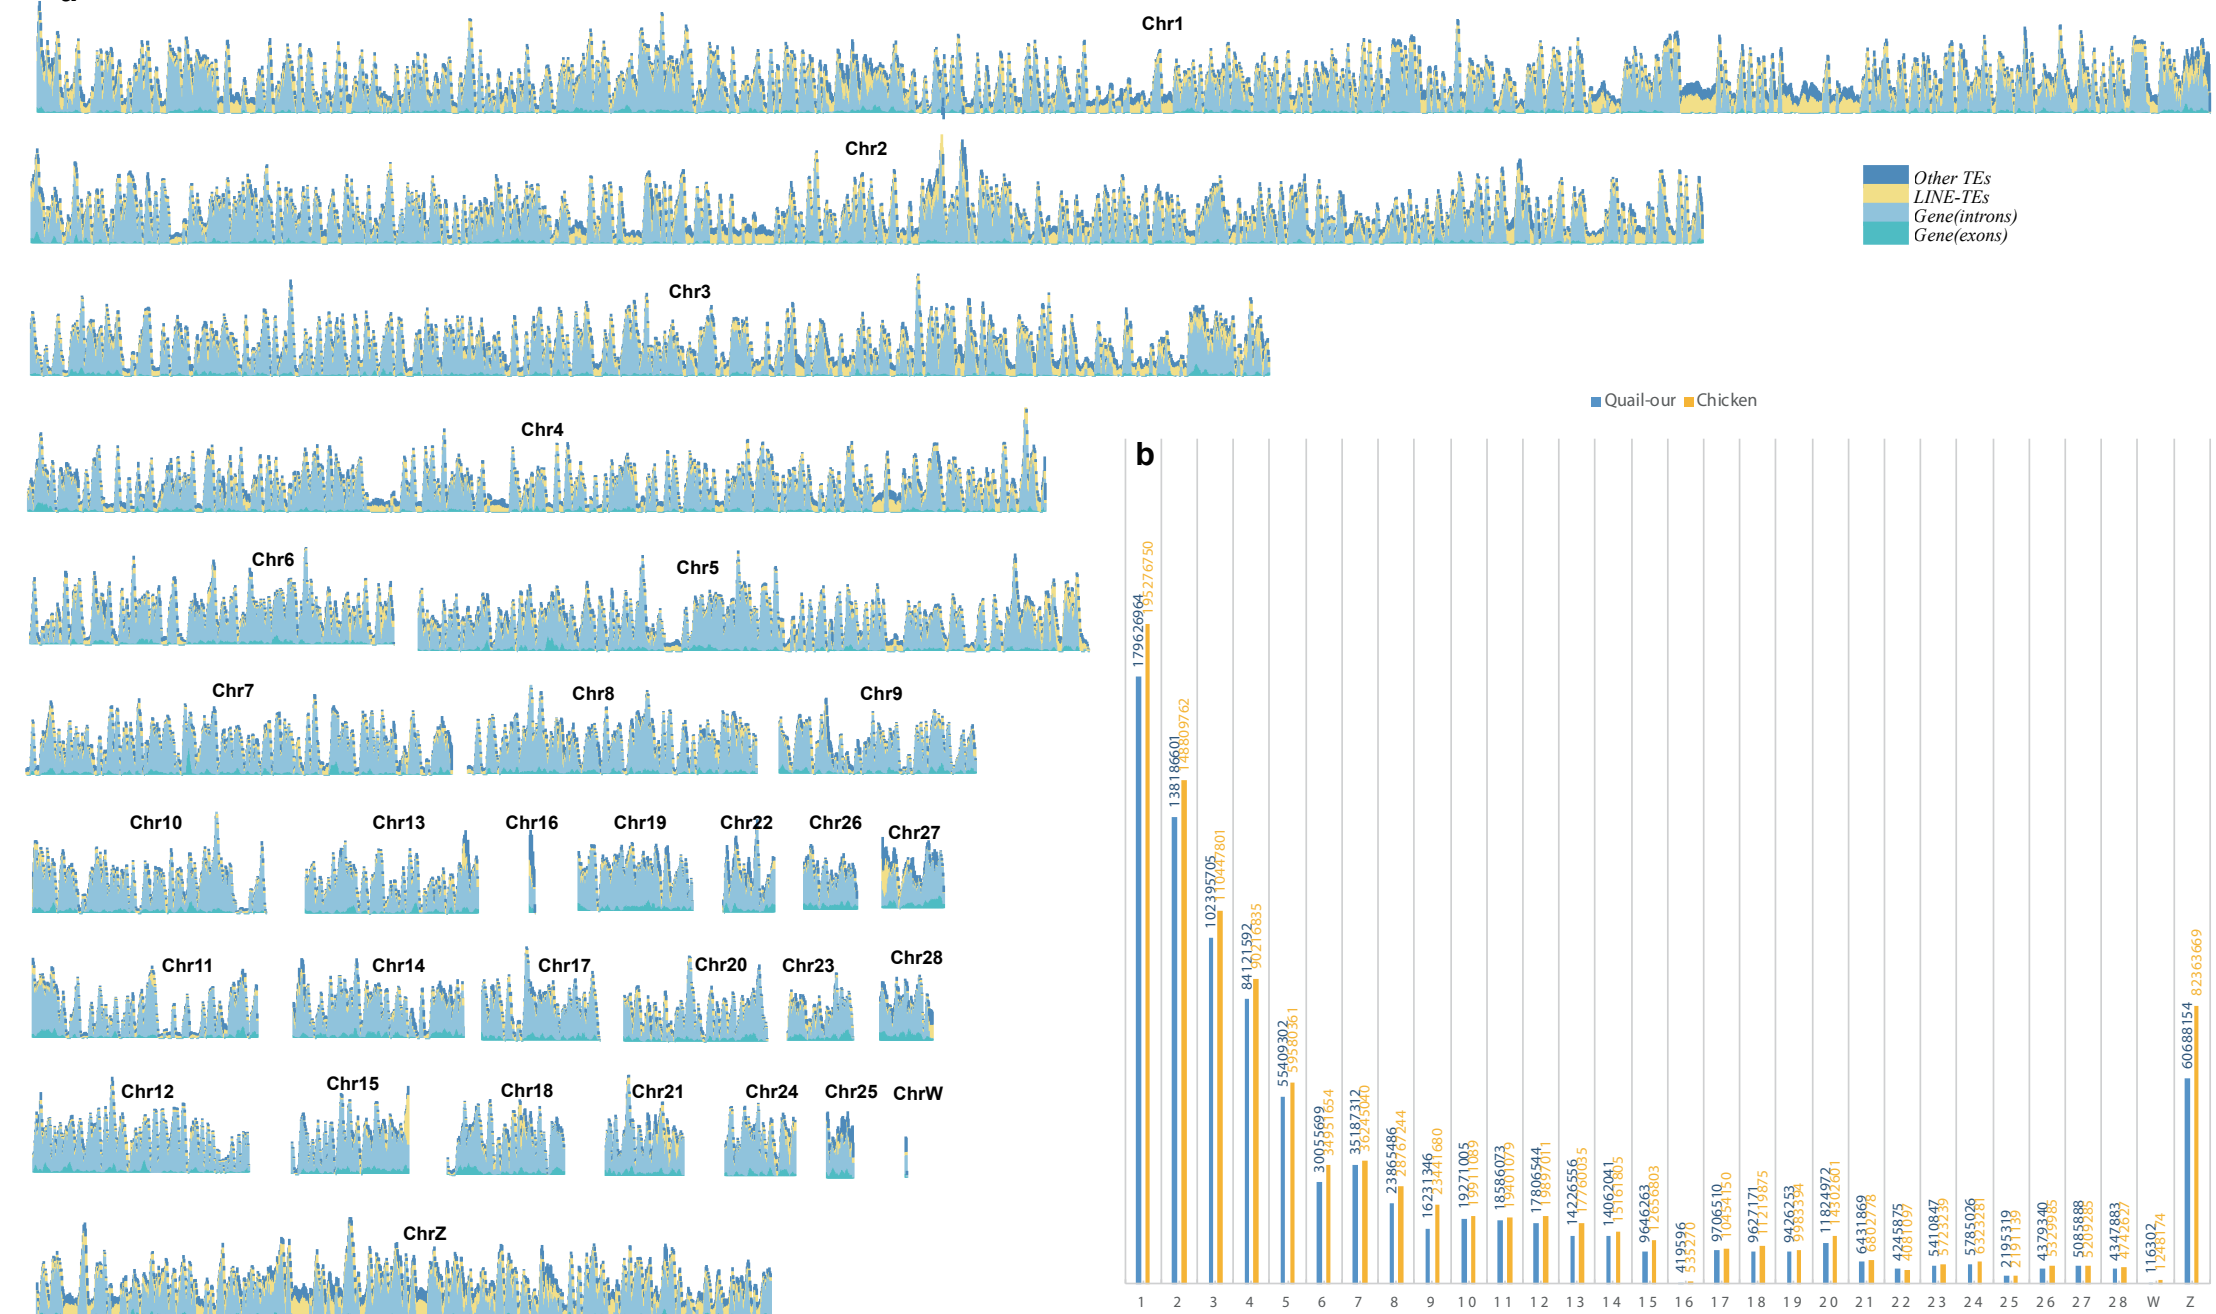





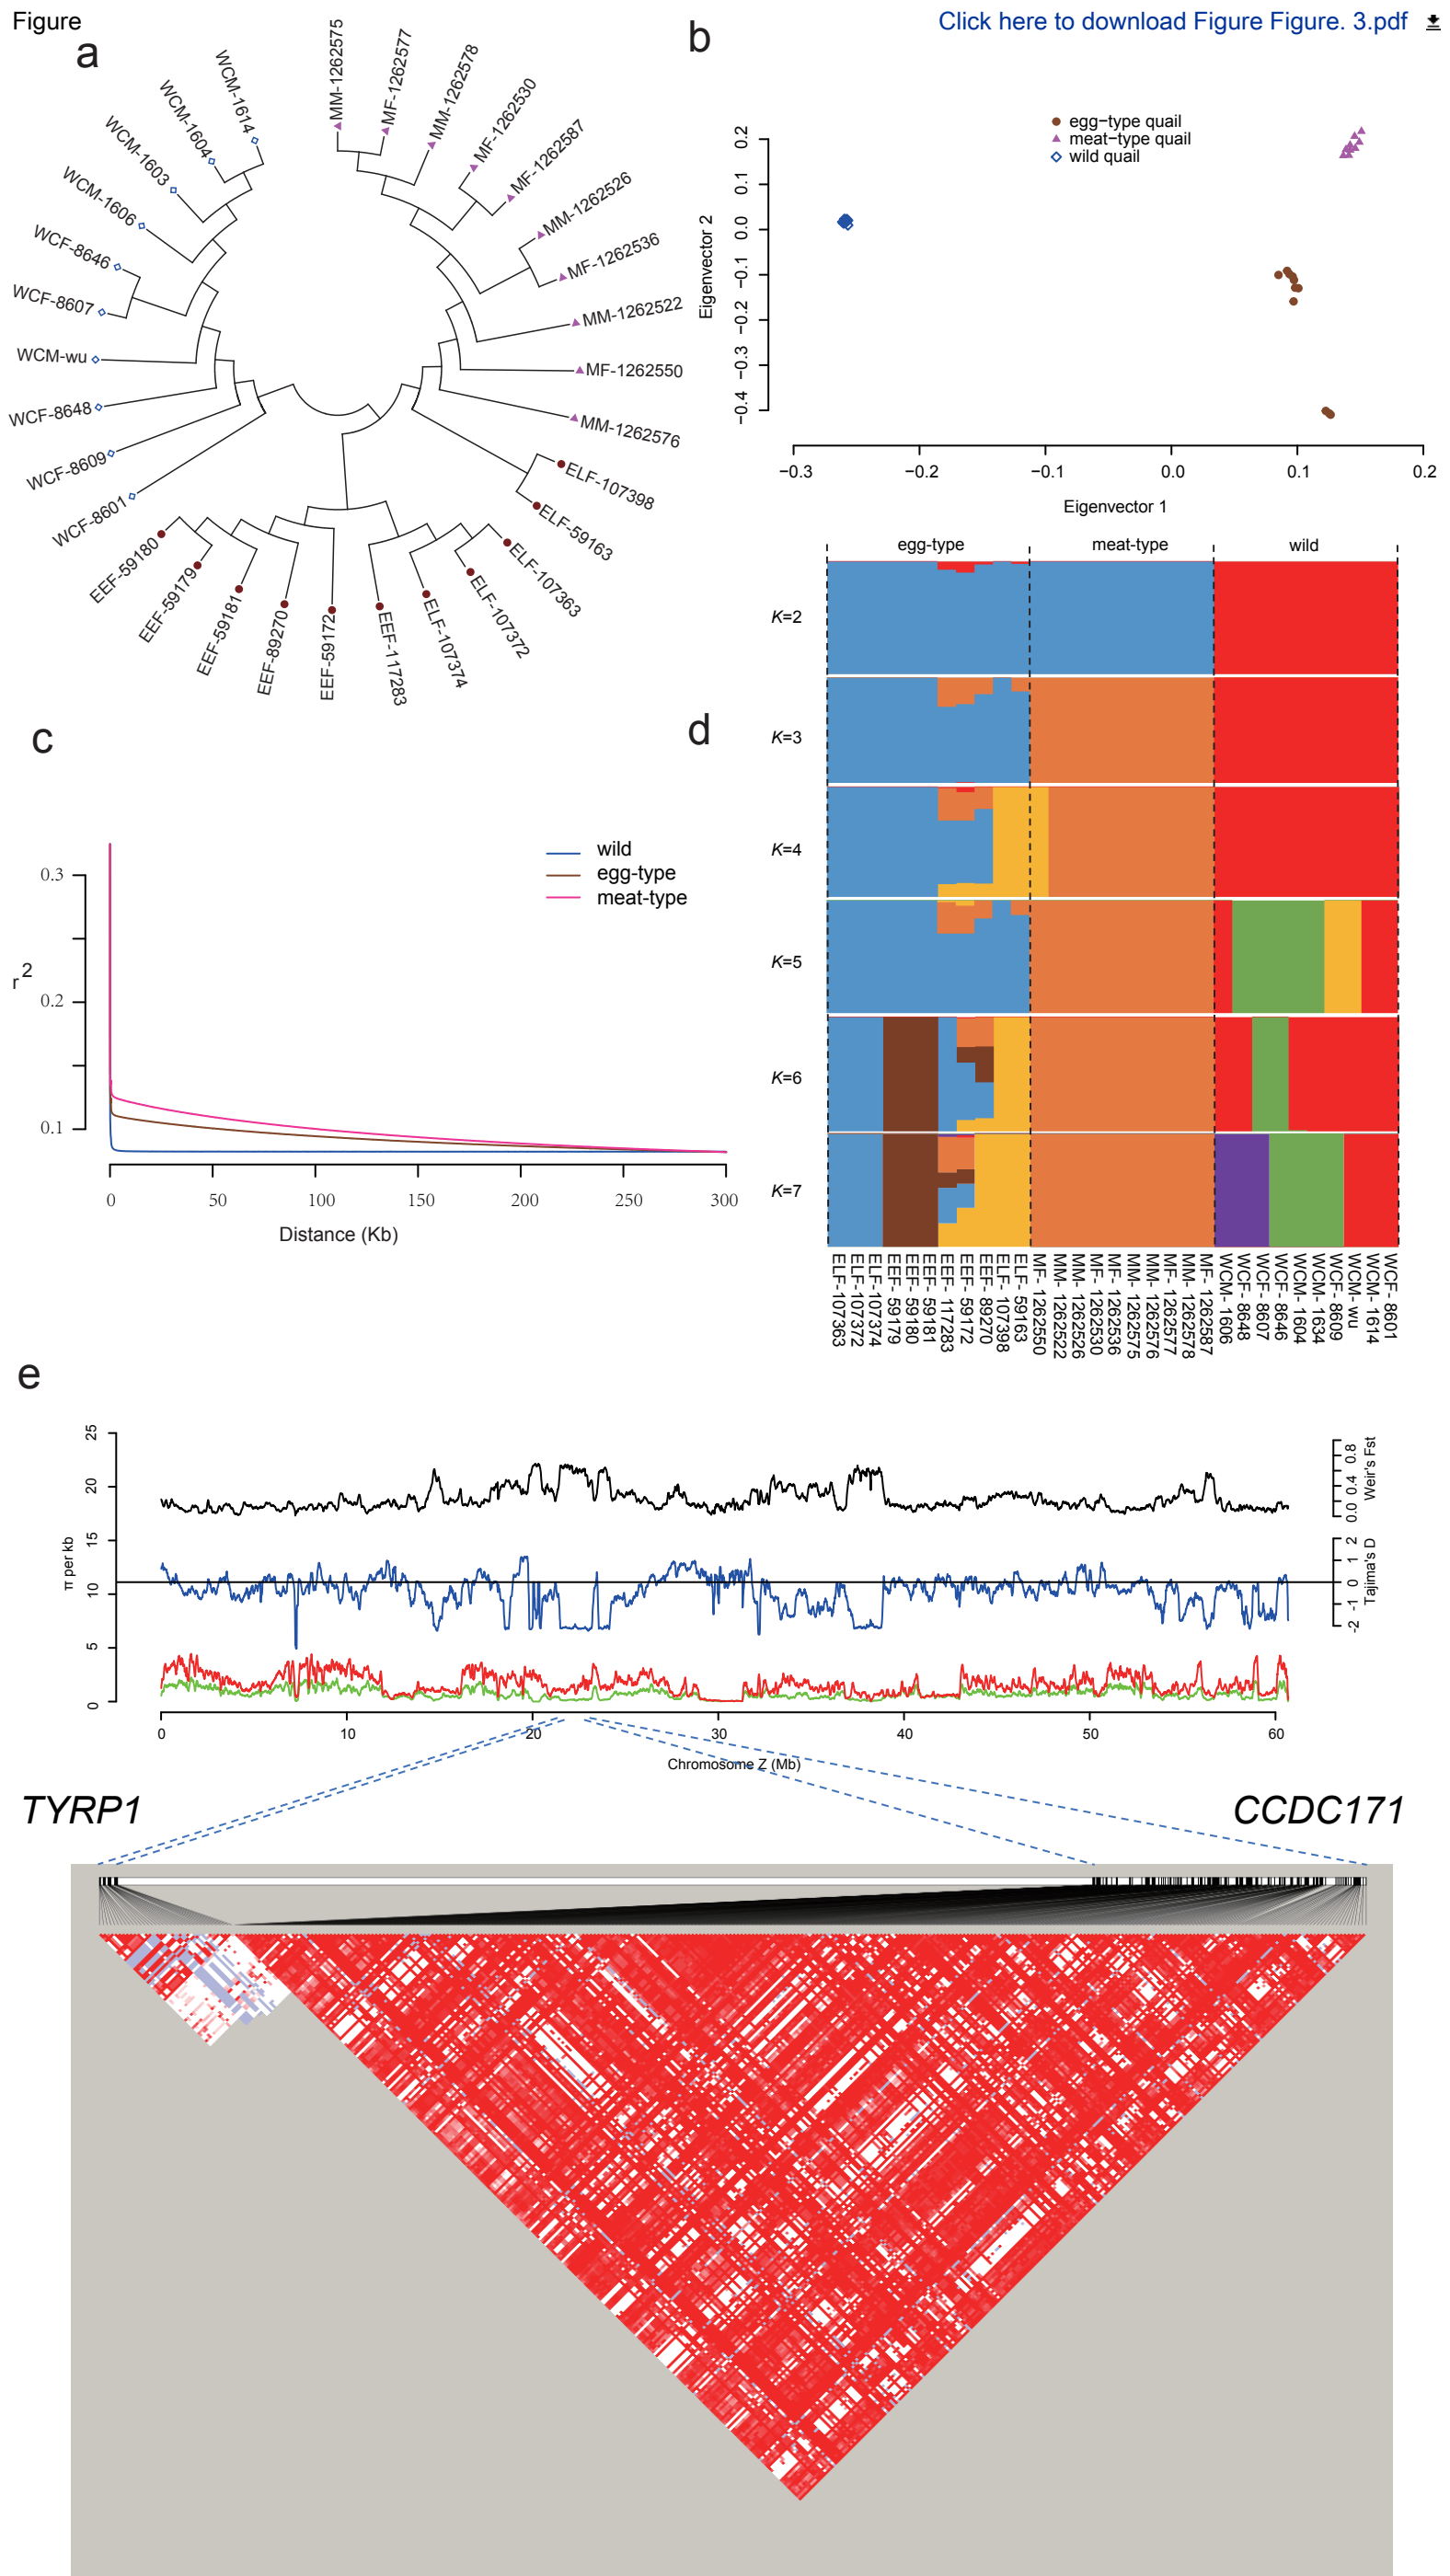

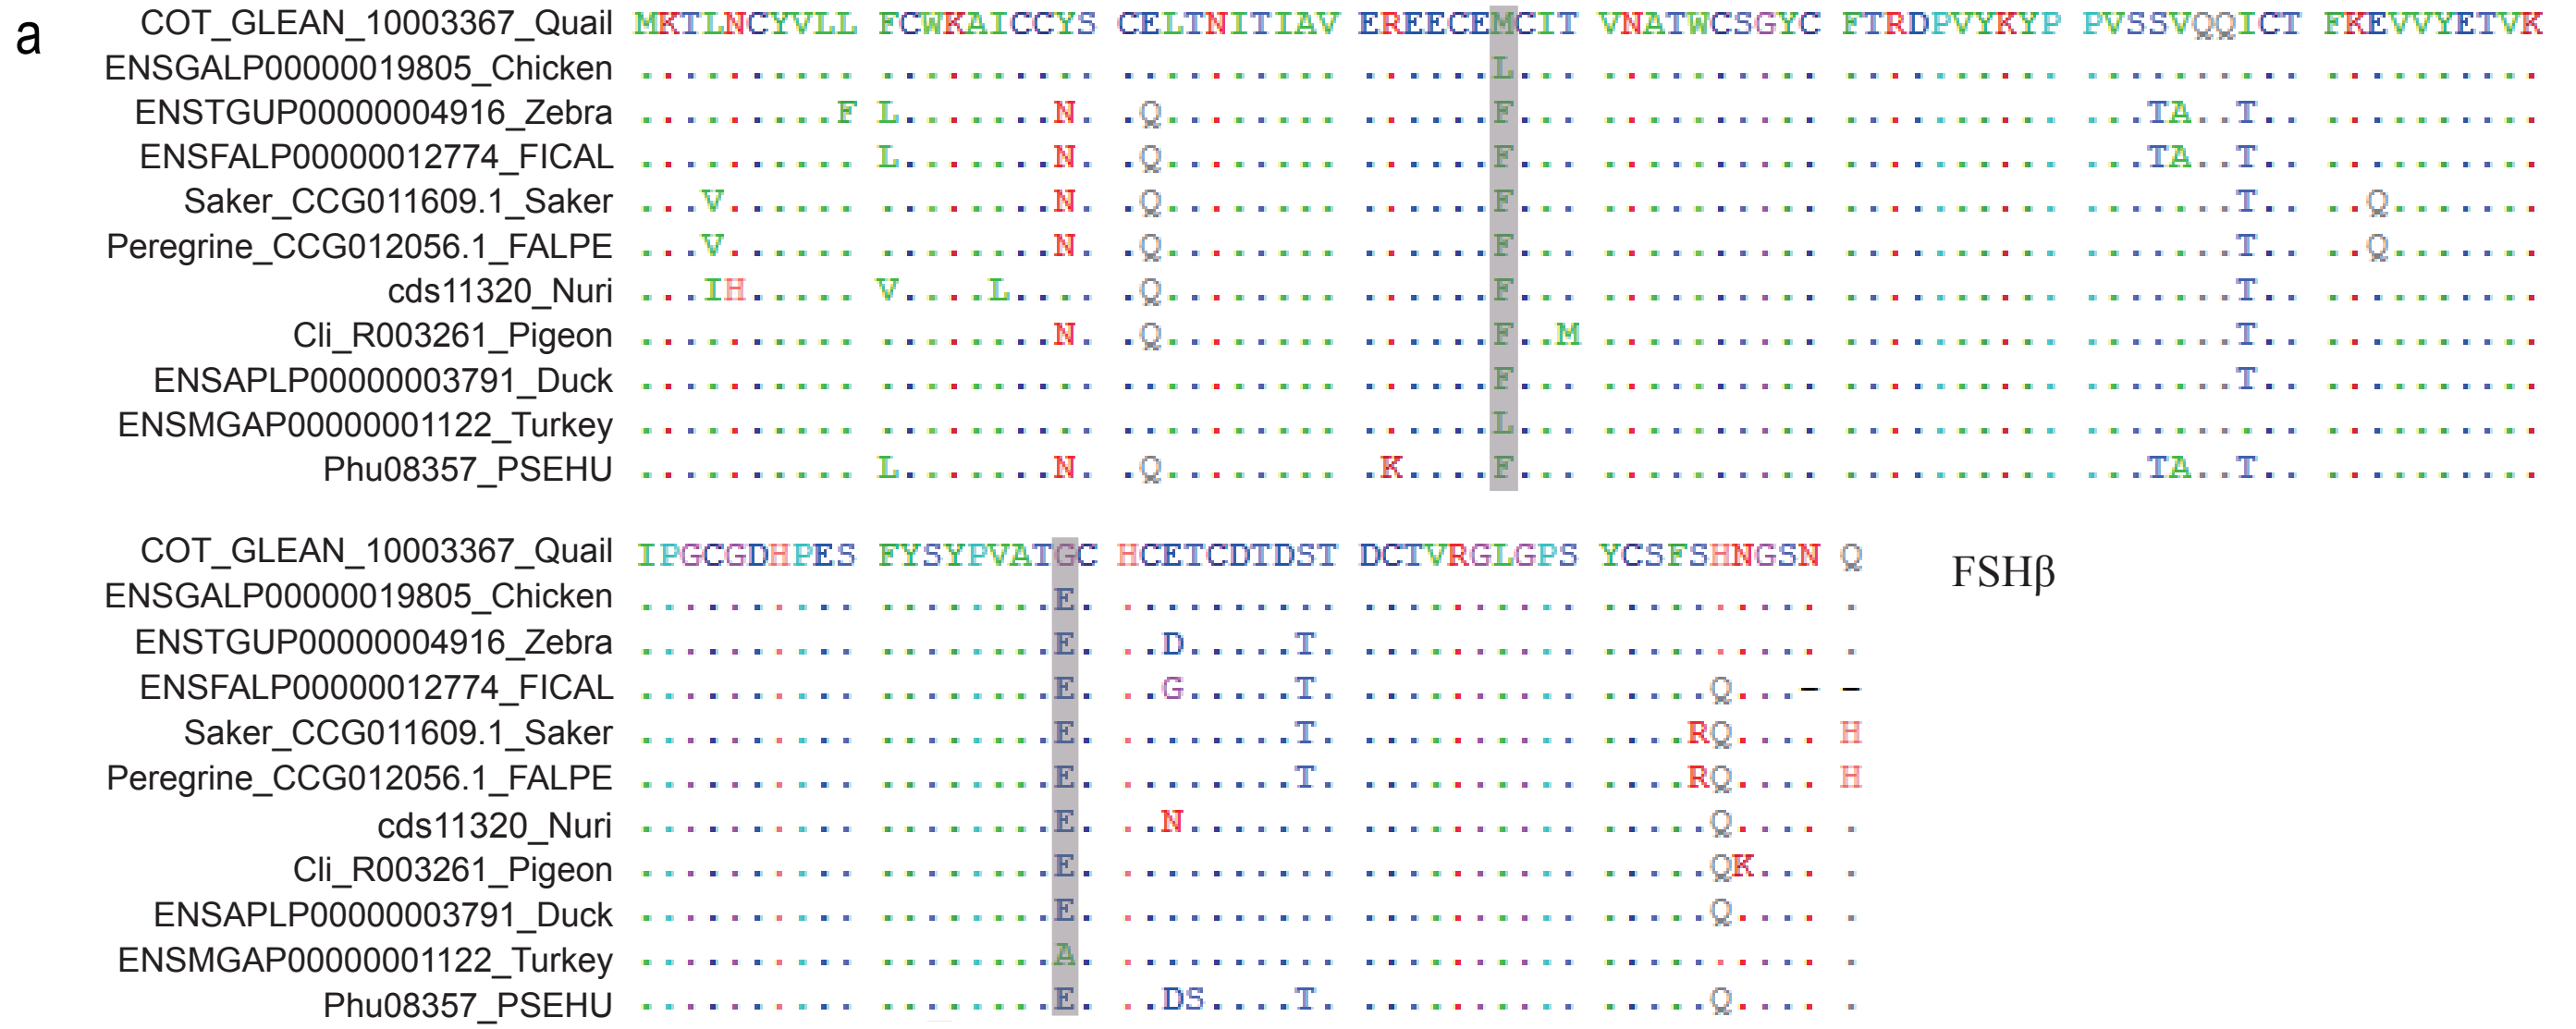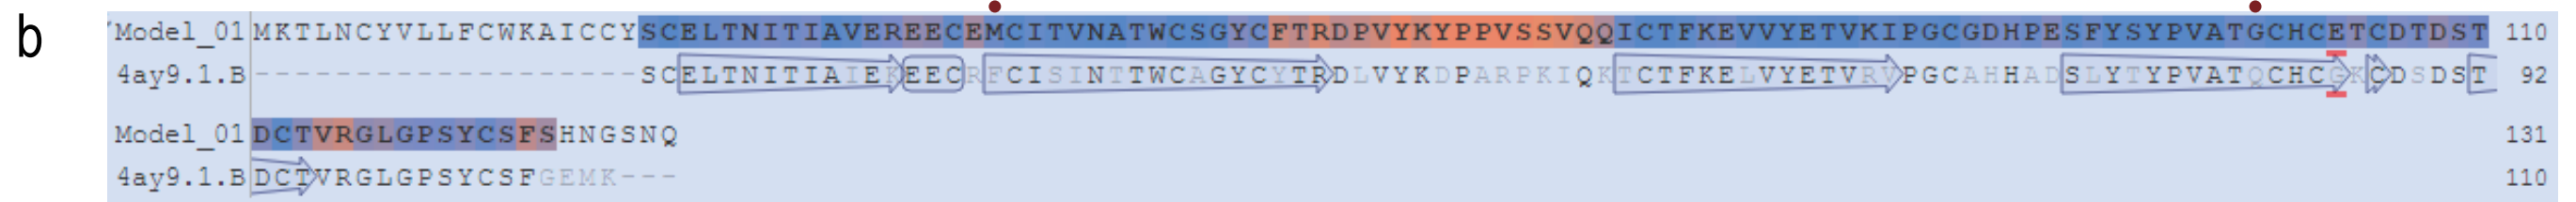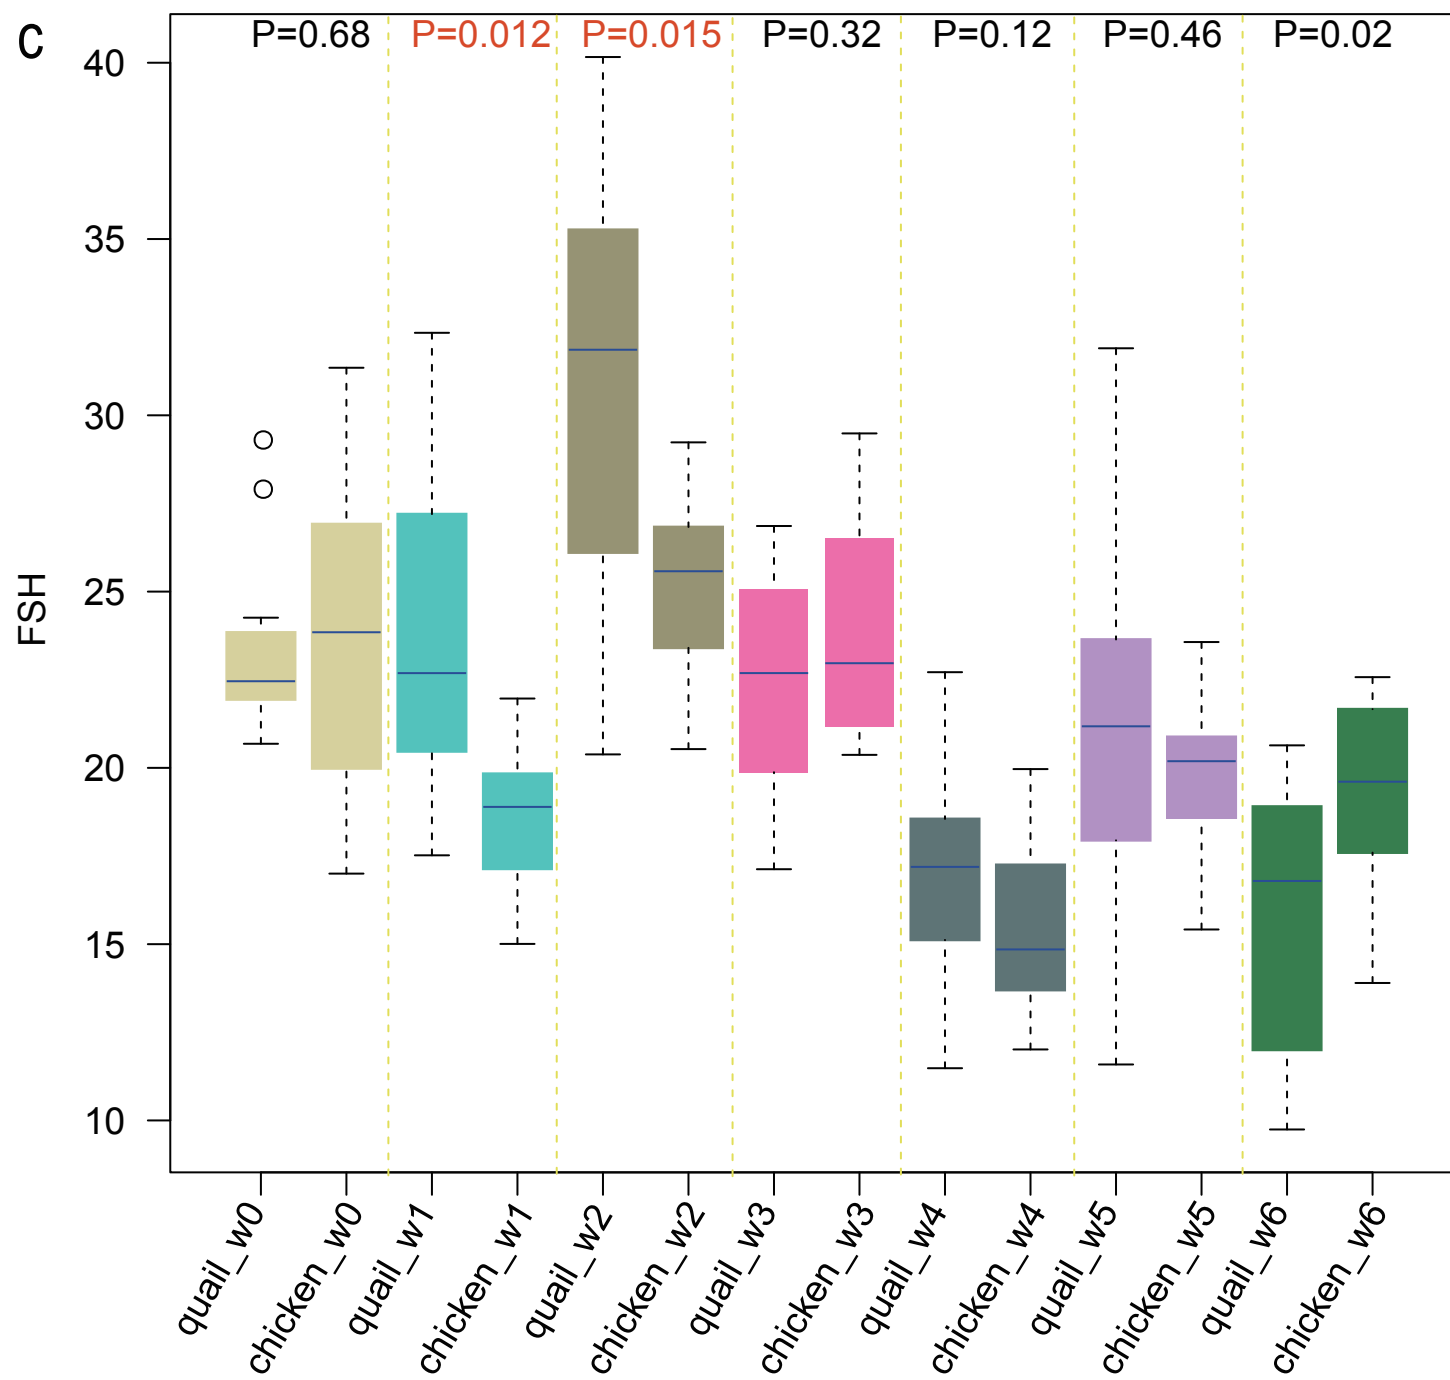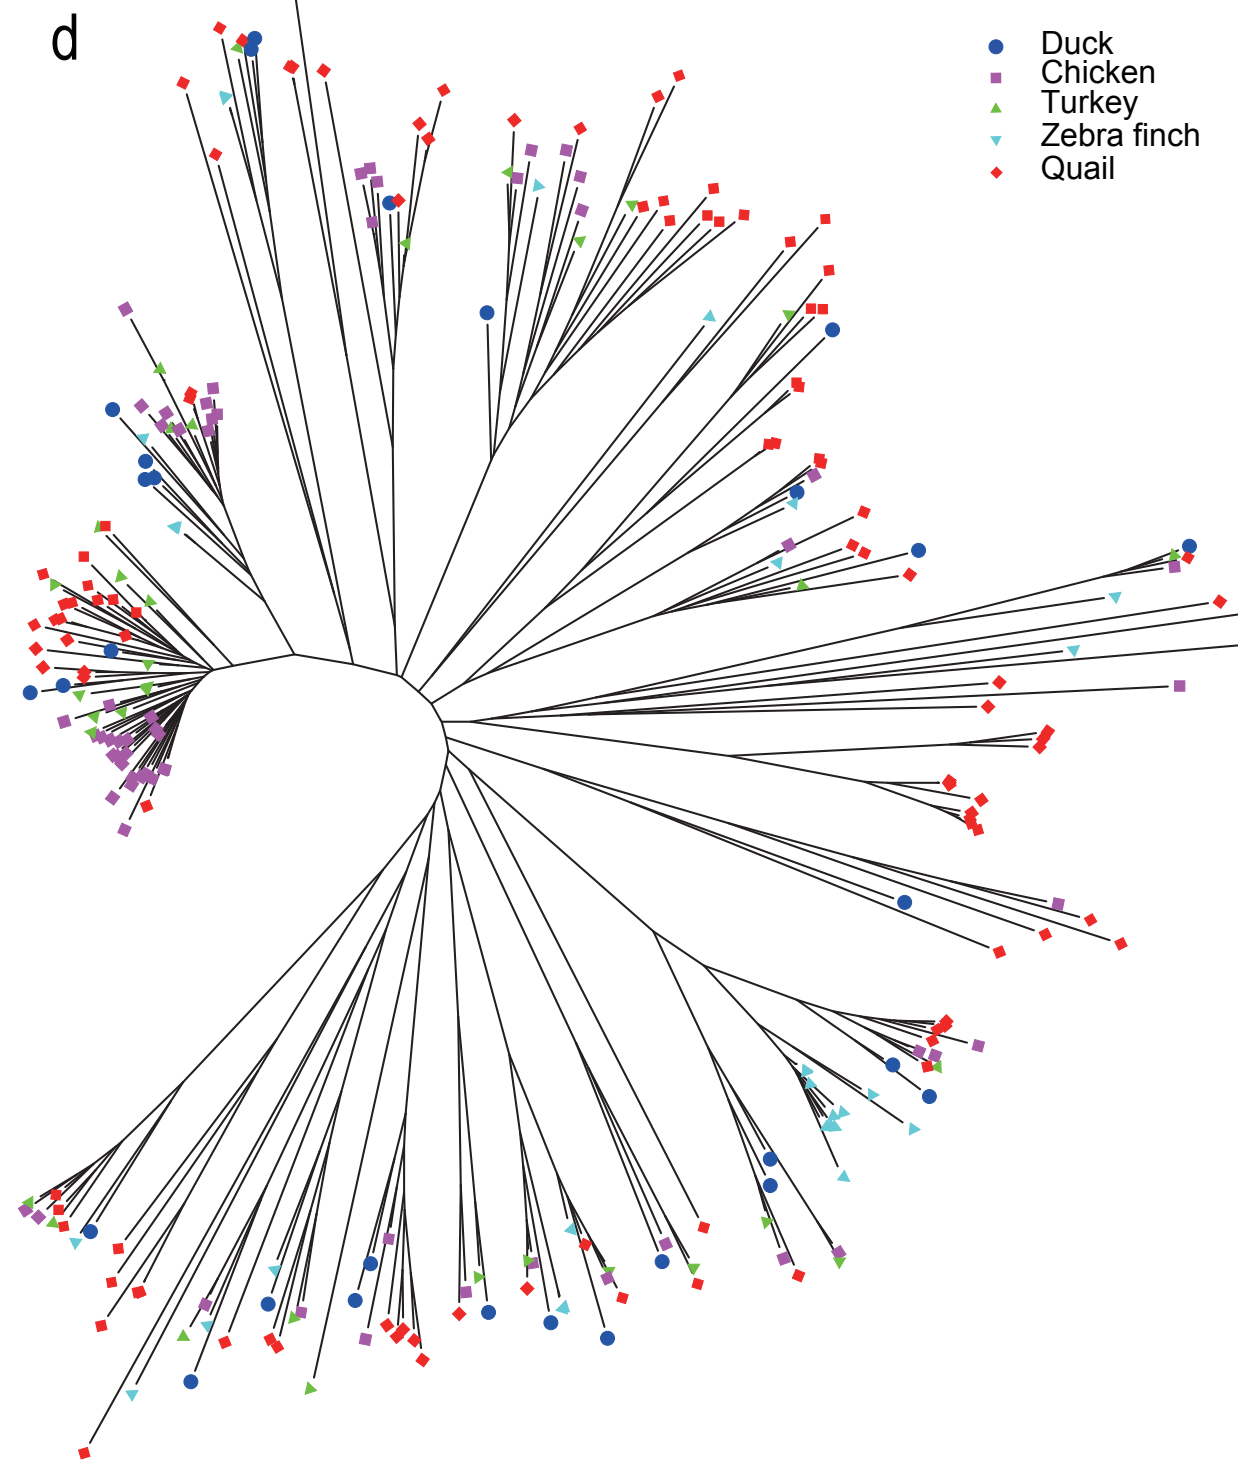

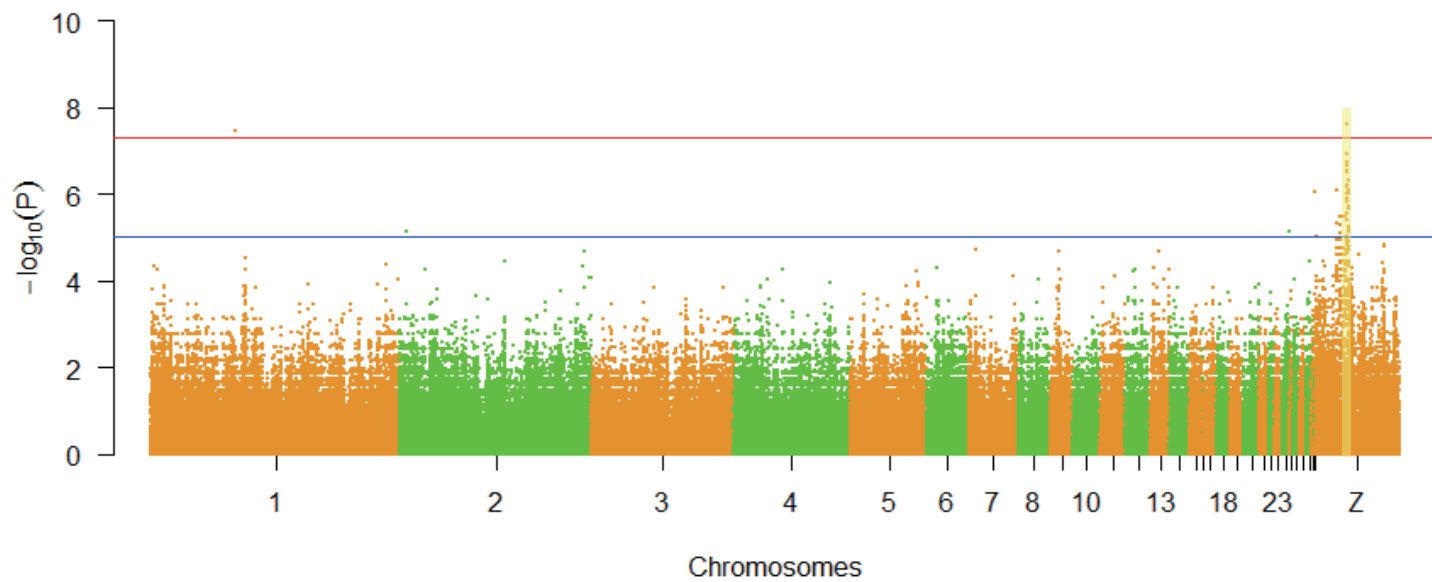

b

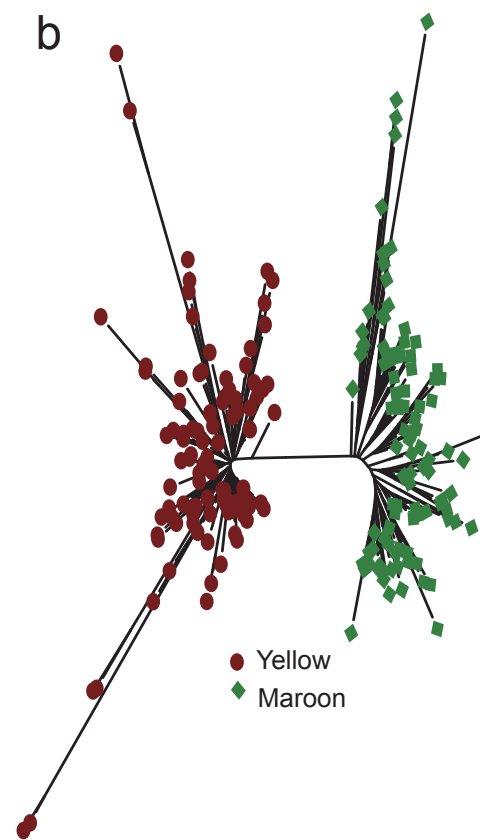

C

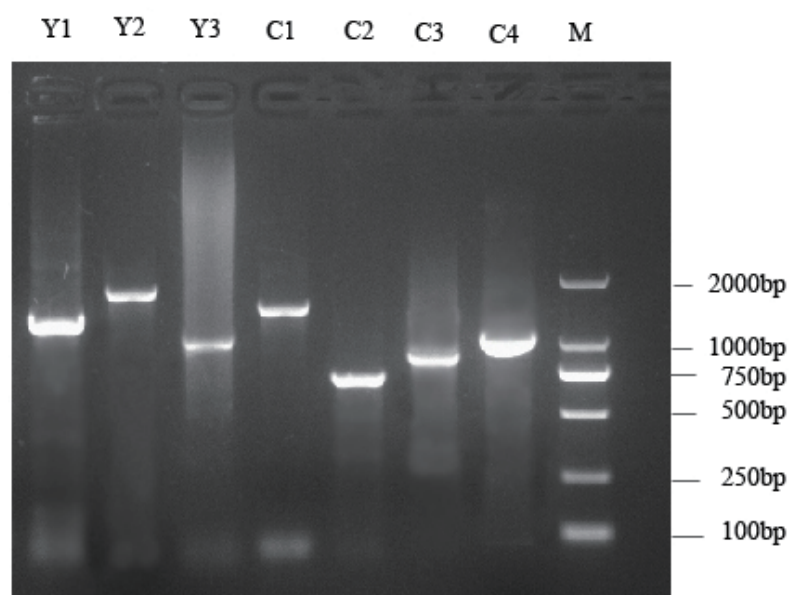

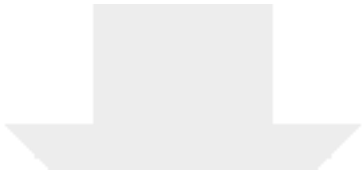

Click here to access/download  
**Supplementary Material**  
Additional file 1.docx



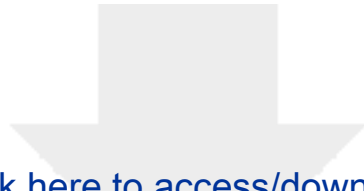

[Click here to access/download](#)

**Supplementary Material**

Table S11 diversity statistics of 31 quails.xlsx

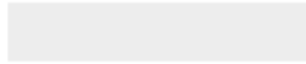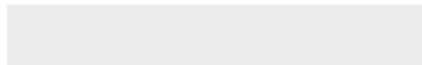



Click here to access/download  
**Supplementary Material**  
Table S12.xlsx





Click here to access/download  
**Supplementary Material**  
Table.S13.xls

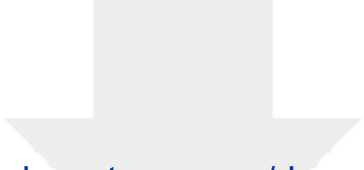

Click here to access/download  
**Supplementary Material**  
Table S14.xlsx



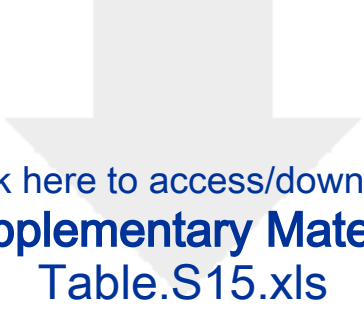

Click here to access/download  
**Supplementary Material**  
Table.S15.xls



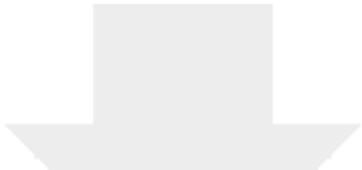

Click here to access/download  
**Supplementary Material**  
Table S17.xlsx



Supplement: giy049_giga-d-17-00216_original_submission.pdf [file giy049_giga-d-17-00216_original_submission.pdf]
