# Supplementary material for: Population genomic data reveal genes related to important traits of quail
Source: PubMed Central journal article supplement (PMC5961004; doi:10.1093/gigascience/giy049), 2018-05-11

|                                                      |                                                                                                                                                                                                                                                                                                                                                                                                                                                                                                                                                                                                                                                                                                                                                                                                                                                                                                                                                                                                                                                                                                                                                                                                                                                                                                                                                                                                                                                                                                                                                                                                                                                                                                                                                                                                                                                                                                                                                                                                                                                                                                                                                                                                                                 |               |
|------------------------------------------------------|---------------------------------------------------------------------------------------------------------------------------------------------------------------------------------------------------------------------------------------------------------------------------------------------------------------------------------------------------------------------------------------------------------------------------------------------------------------------------------------------------------------------------------------------------------------------------------------------------------------------------------------------------------------------------------------------------------------------------------------------------------------------------------------------------------------------------------------------------------------------------------------------------------------------------------------------------------------------------------------------------------------------------------------------------------------------------------------------------------------------------------------------------------------------------------------------------------------------------------------------------------------------------------------------------------------------------------------------------------------------------------------------------------------------------------------------------------------------------------------------------------------------------------------------------------------------------------------------------------------------------------------------------------------------------------------------------------------------------------------------------------------------------------------------------------------------------------------------------------------------------------------------------------------------------------------------------------------------------------------------------------------------------------------------------------------------------------------------------------------------------------------------------------------------------------------------------------------------------------|---------------|
| <b>Manuscript Number:</b>                            | GIGA-D-17-00216R1                                                                                                                                                                                                                                                                                                                                                                                                                                                                                                                                                                                                                                                                                                                                                                                                                                                                                                                                                                                                                                                                                                                                                                                                                                                                                                                                                                                                                                                                                                                                                                                                                                                                                                                                                                                                                                                                                                                                                                                                                                                                                                                                                                                                               |               |
| <b>Full Title:</b>                                   | Population genomic data reveal genes related to important traits of quail                                                                                                                                                                                                                                                                                                                                                                                                                                                                                                                                                                                                                                                                                                                                                                                                                                                                                                                                                                                                                                                                                                                                                                                                                                                                                                                                                                                                                                                                                                                                                                                                                                                                                                                                                                                                                                                                                                                                                                                                                                                                                                                                                       |               |
| <b>Article Type:</b>                                 | Research                                                                                                                                                                                                                                                                                                                                                                                                                                                                                                                                                                                                                                                                                                                                                                                                                                                                                                                                                                                                                                                                                                                                                                                                                                                                                                                                                                                                                                                                                                                                                                                                                                                                                                                                                                                                                                                                                                                                                                                                                                                                                                                                                                                                                        |               |
| <b>Funding Information:</b>                          | Study and application of functional genes in quail precocious traits based on whole genome analysis (2012tsxk09)                                                                                                                                                                                                                                                                                                                                                                                                                                                                                                                                                                                                                                                                                                                                                                                                                                                                                                                                                                                                                                                                                                                                                                                                                                                                                                                                                                                                                                                                                                                                                                                                                                                                                                                                                                                                                                                                                                                                                                                                                                                                                                                | Dr Jinping Du |
|                                                      | Molecular breeding of poultry (2014-2017 ZD146)                                                                                                                                                                                                                                                                                                                                                                                                                                                                                                                                                                                                                                                                                                                                                                                                                                                                                                                                                                                                                                                                                                                                                                                                                                                                                                                                                                                                                                                                                                                                                                                                                                                                                                                                                                                                                                                                                                                                                                                                                                                                                                                                                                                 | Dr Yan Wu     |
| <b>Abstract:</b>                                     | <p><b>Abstract</b></p> <p><b>Background:</b> Japanese quail (<i>Coturnix japonica</i>), a recently domesticated poultry species, is important not only as an agricultural product, but also as a model bird species for genetic research. However, most of the biological questions, genomics, phylogenetics and genetics of some important economic traits, are not solved. In view of this, it is necessary to complete a high-quality genome sequence as well as series of comparative genomics, evolution and functional studies.</p> <p><b>Result:</b> Here we present a quail genome assembly spanning 1.04Gb with 86.63% of sequences anchored to 30 chromosomes (28 autosomes and two sex chromosomes Z/W). Our genomic data solved the long-term debate of phylogeny among <i>Perdixinae</i> (Japanese quail), <i>Meleagridinae</i> (turkey) and <i>Phasianinae</i> (chicken). Comparative genomics and functional genomic data found that four candidate genes involved in early-maturation had experienced positive selection, and one of them encodes follicle stimulating hormone beta (FSH<math>\beta</math>), which is correlated with different FSH<math>\beta</math> levels in quail and chicken. We re-sequenced 31 quails (10 wild, 11 egg-type and 10 meat-type) and identified 18 and 26 candidate selective sweep regions in egg-type and meat-type lines, respectively. That only one of them shared between egg-type and meat-type lines suggested that they were subject to an independent selection. We also detected a haplotype on chromosome Z which was closely linked with marron/yellow plumage in quail using population resequencing and genome-wide association study. This haplotype block would be useful for quail breeding program.</p> <p><b>Conclusions:</b> This study provided a high-quality quail reference genome, identified quail specific genes and solved quail phylogeny. We have identified genes related to quail's early-maturation and a marker for plumage color which is significant for quail breeding. The present results will facilitate biological discovery in quail and help us to elucidate the evolutionary process within the <i>Phasianidae</i> family.</p> |               |
| <b>Corresponding Author:</b>                         | Xin Liu, Ph.D.<br>BGI<br>CHINA                                                                                                                                                                                                                                                                                                                                                                                                                                                                                                                                                                                                                                                                                                                                                                                                                                                                                                                                                                                                                                                                                                                                                                                                                                                                                                                                                                                                                                                                                                                                                                                                                                                                                                                                                                                                                                                                                                                                                                                                                                                                                                                                                                                                  |               |
| <b>Corresponding Author Secondary Information:</b>   |                                                                                                                                                                                                                                                                                                                                                                                                                                                                                                                                                                                                                                                                                                                                                                                                                                                                                                                                                                                                                                                                                                                                                                                                                                                                                                                                                                                                                                                                                                                                                                                                                                                                                                                                                                                                                                                                                                                                                                                                                                                                                                                                                                                                                                 |               |
| <b>Corresponding Author's Institution:</b>           | BGI                                                                                                                                                                                                                                                                                                                                                                                                                                                                                                                                                                                                                                                                                                                                                                                                                                                                                                                                                                                                                                                                                                                                                                                                                                                                                                                                                                                                                                                                                                                                                                                                                                                                                                                                                                                                                                                                                                                                                                                                                                                                                                                                                                                                                             |               |
| <b>Corresponding Author's Secondary Institution:</b> |                                                                                                                                                                                                                                                                                                                                                                                                                                                                                                                                                                                                                                                                                                                                                                                                                                                                                                                                                                                                                                                                                                                                                                                                                                                                                                                                                                                                                                                                                                                                                                                                                                                                                                                                                                                                                                                                                                                                                                                                                                                                                                                                                                                                                                 |               |
| <b>First Author:</b>                                 | Yan Wu                                                                                                                                                                                                                                                                                                                                                                                                                                                                                                                                                                                                                                                                                                                                                                                                                                                                                                                                                                                                                                                                                                                                                                                                                                                                                                                                                                                                                                                                                                                                                                                                                                                                                                                                                                                                                                                                                                                                                                                                                                                                                                                                                                                                                          |               |
| <b>First Author Secondary Information:</b>           |                                                                                                                                                                                                                                                                                                                                                                                                                                                                                                                                                                                                                                                                                                                                                                                                                                                                                                                                                                                                                                                                                                                                                                                                                                                                                                                                                                                                                                                                                                                                                                                                                                                                                                                                                                                                                                                                                                                                                                                                                                                                                                                                                                                                                                 |               |
| <b>Order of Authors:</b>                             | Yan Wu                                                                                                                                                                                                                                                                                                                                                                                                                                                                                                                                                                                                                                                                                                                                                                                                                                                                                                                                                                                                                                                                                                                                                                                                                                                                                                                                                                                                                                                                                                                                                                                                                                                                                                                                                                                                                                                                                                                                                                                                                                                                                                                                                                                                                          |               |
|                                                      | Yaolei Zhang                                                                                                                                                                                                                                                                                                                                                                                                                                                                                                                                                                                                                                                                                                                                                                                                                                                                                                                                                                                                                                                                                                                                                                                                                                                                                                                                                                                                                                                                                                                                                                                                                                                                                                                                                                                                                                                                                                                                                                                                                                                                                                                                                                                                                    |               |
|                                                      | Zhuocheng Hou                                                                                                                                                                                                                                                                                                                                                                                                                                                                                                                                                                                                                                                                                                                                                                                                                                                                                                                                                                                                                                                                                                                                                                                                                                                                                                                                                                                                                                                                                                                                                                                                                                                                                                                                                                                                                                                                                                                                                                                                                                                                                                                                                                                                                   |               |
|                                                      | Guangyi Fan                                                                                                                                                                                                                                                                                                                                                                                                                                                                                                                                                                                                                                                                                                                                                                                                                                                                                                                                                                                                                                                                                                                                                                                                                                                                                                                                                                                                                                                                                                                                                                                                                                                                                                                                                                                                                                                                                                                                                                                                                                                                                                                                                                                                                     |               |
|                                                      | Jinsong Pi                                                                                                                                                                                                                                                                                                                                                                                                                                                                                                                                                                                                                                                                                                                                                                                                                                                                                                                                                                                                                                                                                                                                                                                                                                                                                                                                                                                                                                                                                                                                                                                                                                                                                                                                                                                                                                                                                                                                                                                                                                                                                                                                                                                                                      |               |

|                                                |                                                                                                                                                         |
|------------------------------------------------|---------------------------------------------------------------------------------------------------------------------------------------------------------|
|                                                | Shuai Sun                                                                                                                                               |
|                                                | Jiang Chen                                                                                                                                              |
|                                                | Huaqiao Liu                                                                                                                                             |
|                                                | Xiao Du                                                                                                                                                 |
|                                                | Jie Shen                                                                                                                                                |
|                                                | Gang Hu                                                                                                                                                 |
|                                                | Wenbin Chen                                                                                                                                             |
|                                                | Ailuan Pan                                                                                                                                              |
|                                                | Pingping Yin                                                                                                                                            |
|                                                | Xiaoli Chen                                                                                                                                             |
|                                                | Yuejin Pu                                                                                                                                               |
|                                                | He Zhang                                                                                                                                                |
|                                                | Zenhua Liang                                                                                                                                            |
|                                                | jianbo Jian                                                                                                                                             |
|                                                | Hao Zhang                                                                                                                                               |
|                                                | Bin Wu                                                                                                                                                  |
|                                                | Jing Sun                                                                                                                                                |
|                                                | Jianwei Chen                                                                                                                                            |
|                                                | Hu Tao                                                                                                                                                  |
|                                                | Ting Yang                                                                                                                                               |
|                                                | Hongwei Xiao                                                                                                                                            |
|                                                | Huan Yang                                                                                                                                               |
|                                                | Chuanwei Zheng                                                                                                                                          |
|                                                | Mingzhou Bai                                                                                                                                            |
|                                                | Xiaodong Fang                                                                                                                                           |
|                                                | David W. Burt                                                                                                                                           |
|                                                | Wen Wang                                                                                                                                                |
|                                                | Qingyi Li                                                                                                                                               |
|                                                | Xun Xu                                                                                                                                                  |
|                                                | Chengfeng Li                                                                                                                                            |
|                                                | Huanming Yang                                                                                                                                           |
|                                                | Jian Wang                                                                                                                                               |
|                                                | Ning Yang                                                                                                                                               |
|                                                | Xin Liu, Ph.D.                                                                                                                                          |
|                                                | Jinping Du                                                                                                                                              |
| <b>Order of Authors Secondary Information:</b> |                                                                                                                                                         |
| <b>Response to Reviewers:</b>                  | We also attached a docx file named "Respond to Reviewers.docx" which shows respond details for all Reviewers.<br><br>Responses for Reviewers' comments: |



Reviewer #1: I have previously reviewed this manuscript for Nature Communications, and felt it was an excellent study then. It represents a large body of work and is well thought-out and executed. Previously my main points regarding the manuscript comprised of: 1) The use of PLINK for the association analysis and a recommendation to use GEMMA or GEMMAX to control for population substructure 2) Further details on the origin of the birds used for the study, in particular the origins of the different wild and domesticated breeds. 3) The conclusion for the selective sweep mapping experiments that two separate domestication events occurred due to a lack of shared sweeps (when these could be a sign of more recent 'improvement' genes being differentially selected in the broiler and layer breeds). 4) Gene expansion evidence indicating that GnRH is causal to the onset of sexual maturity in the quail. All of these points have been well addressed. The authors have used GEMMAX and provided more details on the cross. They have toned down the assertion that this is proof of two independent domestication events (they could maybe mention 'improvement selection', but this is very minor). For the gene expansion pertaining to GnRH and sexual maturity, I couldn't find the details of the numbers of different gene families that were identified as expanding, which I would like to see (as it allows the reader to evaluate how these genes in particular were targeted). They have toned down the assertion that GnRH is strongly controlling time to sexual maturity and they have also mentioned that no selective sweeps overlapped the GnRH genes as a caveat. The language could be tidied up a little in places (the usual refrain about getting a naïve reader to look through it with fresh eyes to weed these out). I am very happy with the manuscript (in fact, I was surprised it wasn't accepted by Nature Communications as I didn't feel that any of these were fatal flaws), and have no hesitation in endorsing it.

RE: First of all, the authors are all thankful of your appreciation for our work. A very short sexual maturity time is the unique characteristic among all compared birds. It means that the quail has obtained this attribute after the split of quails from other birds. This is the reason we can detect gene expansion (Table S18) and positively selected genes in the GnRH pathway; some functional studies also support our hypothesis. Selective sweep regions didn't harbor any sexual maturity-related genes in this study. The major reason is that we compared selective regions among three different types of quails. As all quails have this unique trait, we cannot detect selective sweep regions for sexual maturity.

Reviewer #2: In this manuscript, the authors present a chromosome level assembly of the quail genome, and through comparative genomics and RNA-seq address a large variety of questions regarding the relationship of the quail to other galliformes, and identify several important and interesting genes related to various traits such as immunity, sexual maturity and plumage. This is very interesting work, containing well designed experiments and a lot of useful results. Line 61-65: references required. Or the authors need to clarify that these statements are anecdotal. RE: We have added related papers, see references 14-16. Line 78: The sentence "Some of the key avian ... were included[25]." is a poorly formed sentence. I am not sure what the authors are referring to here. I assume that the authors mean that the phylogeny and genetic relationships between the three avian model systems are not well resolved.

RE: We have revised the sentence. The revised sentence is as follows: "The phylogeny and genetic relationships for some of the key avian model systems (i.e., the chicken, turkey, and Japanese quail) are not well resolved". See line 78-79.

Line 118: What do the authors mean by consistency between the previously released genome and their assembly? From Fig S2, it looks like it is synteny, but a little more information on the statistics used to test for consistency between the genomes would be useful.

RE: We compared these two genomes at whole genome level to detect all synteny blocks which were defined as consistency regions and have already supplemented the statistic method and it is as follows "Here we employed Lastz (v1.02.00) with parameters 'T=2 C=2 H=2000 Y=3400 L=6000 K=2200' to compare 30 chromosomes of the two genomes and then calculated the synteny ratio of them after excluding 'N' bases. The figure showed syntenic relationships of blocks more than 5 kb". See legend of Figure S2.

Line 123-126: The sentence "In addition ... peak-laying (LP) (Table S4)." does not make any sense. It looks like the authors are missing some part of the sentence.

RE: We have revised the sentence. The revised sentence is as follows: "To assess the

integrity of protein-coding genes in the quail genome assembly, all transcripts assembled from RNA-Seq data sampled from the hypothalamus and ovary of three stages of quail maturity (before-laying (BL), laying (L) and peak-laying (LP)), were mapped to the assembled genome (Table S4) and ~96.33% of total complete BUSCO genes can be identified in the genome (Table S5)." See line 124-129.

Line 178-181: Number of SNPs identified seems very high implying a very high nucleotide diversity. Were the SNPs identified in the combined populations - so all 31 samples together - or were the SNPs identified using single sample callers. There are caveats in both these methods that could lead to a lot of spurious SNP calls.

RE: The method of joint variant calling, the tool of "UnifiedGenotyper" in GATK3, was used in the combined populations, which means the SNPs were identified in all 31 samples together. The high depth of sequencing data could help to reduce the probability of spurious SNPs. We have verified SNPs by PCR in the GWAS section which indicates the method is reliable (line 414-419).

Line 181-183: I was a bit confused by what the authors meant by the different number of SNPs in the different populations. Were these the number of SNPs among the ~22 million total SNPs that were polymorphic in each of the three populations?

RE: Firstly, joint variant calling was used in the combined population so we could get the total number of SNPs. Secondly, we checked whether those SNPs were polymorphic in each of the three subpopulations (meat-type, egg-type and wild) so we could get the number of SNPs for each subpopulation. See line 181-186.

Line 189-191: The differences in the ratio of non-synonymous to synonymous SNPs in the quail compared to the two other galliforms mentioned might be due to differences in sample size, quality of SNPs, the filtering criteria etc. This might indicate that this ratio is not necessarily significantly different from these other two birds.

RE: Just as you said, the differences of N/S ratio in quail population compared to chicken and turkey were influenced by many factors. We have improved the sequencing depth and more SNPs were detected. There was no strong support for the difference in N/S ratio between quail and chicken and turkey. See line 190-193.

Line 195-216: This entire paragraph needs to be rewritten for clarity. It was very difficult to follow the sequence of logical conclusions being laid out by the authors. Firstly, they mention that their estimates of  $\theta_w$  are different in the wild quail compared to the two domestic forms for the autosomes but that their estimate of  $\pi$  is similar in the three populations. Their conclusion from this is that diversity in the wild quail population is quite high but that the three populations are pretty homogeneous within themselves. This conclusion can be tested by using dimension reduction methods such as PCA, MDS or even AMOVA to see if the within and between group variance support this conclusion. The Z chromosome section talking about higher selective pressure across the entire Z chromosome in the egg type quail is a bit hard to believe and looks like it might be artefactual, since all the genic regions on the Z have similarly low levels of diversity in all three populations.

RE: The entire paragraph has been rewritten for clarity as suggested. Some of the conclusions were also updated due to the increased resequencing coverage (from 3.5X to 19X). The conclusions in this part are much more concise this time. Here, we emphasize that the greater genetic diversity in the wild quail as compared to the domesticated populations. The phenomenon that genetic diversity on chromosome Z was reduced compared to the autosomes; and that this was a common finding according to previous studies. See line 196-203.

This implies that the differences on Z have to be driven by non genic regions. I would need strong evidence to believe that non-genic regions are driving selection across the entire chromosome for this population. An alternative hypothesis for the reduced diversity on the Z might lie in the demography of the egg type. The egg type is also the population with the lowest number of SNPs, indicating that possibly the effective population size of this type is lower than both the wild and meat type, and this in turn means that the  $N_e$  of the Z chromosome is lower in these and since Z is more adversely affected by the reduced  $N_e$  than the autosomes, this effect is still detectable on the Z. Finally, Tajima's D is a statistic based on the differences in  $\theta_w$  and  $\pi$ , I am a bit confused that the autosomes do not show any signal in the D statistic, as the authors previously mention that the  $\theta_w$  for the wild quail is different than that for the egg type and the meat type, while the  $\pi$  are similar. A clarification would be immensely helpful.

RE: This is a similar or related question to the one above. We have rewritten these sections.

Lines 227-229: These sentences talk about the the clustering of the wild quail samples on PC1 and PC2. The authors claim that the clustering indicates the homogeneity in wild quail. This is completely false. The first PC is separating out the wild from the domestics and the second PC is separating the egg and meat type. In both these cases, they do not load SNPs that explain the variance within the wild quails. This close clustering of wild quail is to be expected, especially given the low sample sizes in all three groups.

RE: We rewrote the PCA plot result to make it clearer. We deleted the descriptions of variance within in the wild quails (homogeneity) because we agree that this is not much related to the PCA plot. See line 204-214.

Lines 234-241: Interpretation of the ADMIXTURE results. Firstly, given the admixture plots, it is clear that the admixture proportions being calculated for the 31 samples are not stable for the cases from K=4 to K=7. The ancestry clusters appear and disappear and clusters found at lower Ks are not found at higher Ks. Interpreting any of these results is in appropriate and does not lead to valid inferences. Therefore, I suggest that the authors restrict their interpretations to K=2 and K=3 which are very nice results. The slight mixing shown between egg and meat type also explains the spread along PC2 in the PCA plot.

RE: Interpretations of the ADMIXTURE results have been updated by restricting interpretations to K=2 and K=3 as the reviewer suggested. See line 214-228.

Lines 245-248: I am not sure I follow how the quick LD decay is indicative of heterogeneity in populations resulting from gene segregation and high recombination. Firstly, LD computed here is  $r^2$ , which is not an indicator of recombination rates or frequencies, since it depends on the matching of allele frequencies of the two variants under consideration. Second,  $D$  or  $D'$  is a much better candidate for measuring recombination. Third, measure mean pairwise  $r^2$  in windows is highly affected by low frequency variants which by default have low  $r^2$  with other variants. A lower bound on the minor allele frequency would help in this regard. One other thing which might be causing trouble in this and other analyses might be the excess of singletons. An additional column indicating the number of singletons and the proportion of private variants in each of the three populations would be very useful in table 1.

RE: We have revised this conclusion. See line 228-238.

Line 265: "complete bottleneck" is a meaningless term. I think the authors mean to say strong bottleneck.

RE: We agree with your opinion and have replaced the word "complete" with "strong". See line 250.

Lines 283-284: If the authors mean many large scale selection events in the genome, then I agree, but the sentence might need rephrasing. It now sounds like the authors claim multiple selective sweeps in the same loci, which is not possible to tell from the data they use.

RE: Yes, we were trying to say there were many large-scale selection events in the genome. We rephrased this part to make it clearer. See 270-272.

Lines 300-301: We do not need to invoke 2 domestications, but can say that the quail was probably domesticated for other traits (as mentioned earlier probably crowing), and the egg and meat traits were selected upon independently from this domesticated from starting from the early 20th century.

RE: That's a very good suggestion. We rephrased the description by stating "It is worth noting that egg-type and meat-type quails did not share selective sweep regions when compared with wild quails (Figure S11), meaning that egg-type/meat-type quails might have been independently selected after domestication or that there were two separate domestication events in quails." See line 447-451.

Lines 302-304: Did the authors perform RNA seq or similar to measure gene expression? The following paragraph (Lines 305-) does not say anything about expression but about different non-synonymous SNPs in domestics compared to the wild. Although this is very nice analysis, it has nothing to do with differential expression.

RE: Unfortunately, we did not have these RNAseq data.

Lines 335-340: The authors mention that higher FSH $\beta$  leads to reduction in mature FSH, which is required for sexual maturity. But they also mention that this FSH $\beta$  is higher in quail compared to chicken, which would imply later maturity in quail. I might

have missed something but this is counterintuitive.

RE : We revised the description in this sentence. FSH $\beta$  is the major gene for controlling hormone synthesis rate. It means that higher FSH $\beta$  would have higher hormone synthesis rate, and the hormone level could determine the sex maturity in animals. The revised sentence is as follows: "Transcription of the FSH $\beta$  gene is the rate-limiting step for in hormone synthesis which is required for ovarian folliculogenesis in females and for spermatogenesis in males, in conjunction with testosterone." See line 322-324.

Lines 411-415: The additional quails added here come from different populations, which have been shown to be different before, so it would be useful to know what kind of corrections were performed for this, since the lower p-value might be an artifact of population structure in the samples.

RE : Yes, the p-value was the corrected one by Bonferroni method.

Language related comments: Line 27: "That only one of them shared" should read "That only one of them is shared"

Done.

Line 29: "marron" should read "maroon" I think.

Done

Line 60: "than that do in males" should read "than males".

Done.

I stopped here, but there are lots of English related errors in the manuscript, and in its current form, it cannot be published due to the language issues, although the content deserves the platform.

RE: We invited native English speakers to polish the manuscript to resolve any language issues.

Reviewer #3: In the Wu et al manuscript, the authors describe the sequencing of a Japanese quail at 238 fold coverage. They generated an assembly with an N50 contig size of 27.9 kb and an N50 scaffold size of 1.8 Mb. This assembly is less complete than a separate quail assembly with an N50 contig size of 511 kb and N50 scaffold size of 3 Mb (1). The authors used their assembly to build a tree for the Phasianidae family using three different species (Japanese quail, chicken, and turkey). Their results were consistent with the Hackett et al study (2) and several other studies (3-5). These reports all show that the quail and chicken are more closely related to each other than they are to the turkey. It is unclear how impactful these results are other than they confirm previous studies.

RE: Although some investigations have been done to explore the phylogenetic relationship, there are many conflicts among the various studies. We present, for the first time, the use of whole genome data to perform the phylogenetic analysis as this can better confirm the relationship between these species.

The authors compared their quail assembly to 10 other bird genomes, along with a Chinese alligator as an outgroup. The authors did a good job resolving the divergence times of the phasianidae. Including an anseriform was a critical inclusion of the analysis. Figure S7 showing the MrBayes and PhyML based phylogenetic trees was a critical part of the study. Space permitting, the authors may consider moving this figure to the main text.

RE: We agree with your opinion. However, there is not enough space to move this figure to the main text.

The authors then undertook the task of analyzing the genetic diversity in 3 distinct quail for a total of 31 individuals. The authors sequenced approximately 10 individuals at an average of 3.5X coverage. However, there was no listing of the coverage for each individual. There could be some individuals under 1X coverage.

RE: We have increased the average sequencing coverage to ~19X of the genome. All data have been updated accordingly.

The authors did a nice analysis on gene families that potentially lead to early sexual maturity. The quail reaches maturity rapidly relative to other birds. It would be interesting to see a follow up study in a separate manuscript that compared the gene families found to the same gene families in other birds that reach sexual maturity early, like some parrots. Likewise, it would be good to compare these gene families to other birds, beyond chickens that reach sexual maturity later in life.

RE: Thank you for your opinion. We plan to do more research in the future and expect a good result.

For the GNRH1 gene, they found one extra copy compared to the other genomes they studied. They based this on a peptide region (VFLLLLWENLPPVQAGKAREGWVRLVGEKRQESLVHMMWQSQLCITLGYVQEYDYIN

LDPAVTMSLLTELKP) of the protein shown in figure S14. However, when I used this "unique" peptide sequence, I was able to find it in chicken using a blast search (see reviewer fig 1 below). I also noticed a similar observation in the PLCB4 fig S15. See my reviewer fig 2 below. It would be good if the authors could explain this. I also saw a similar observation in figure S16 (chicken protein XP\_015148438) (not shown). This could be due to outdated annotations.

RE:

(1)For GNRH1 gene (Figure S14)

On the one hand, the data we used were from Ensembl release80 database and in the database, there is only one copy of this gene. On the other hand, we have checked the NCBI sequence ID X69491.1 supplied by you. The positive match may only occur at the nucleic acid level and the true translated protein is as below(MEKSRKILVGVLLFTASVAICLAQHWSYGLQPGGKRNAENLVESFQEIANEMESLGGGQKAECPGSYQHPRLSDLKETMASLIEGEARRKEI). The entire information of X69491.1 is also as below. The sequence did not contain VFLLLLWENLPPVQAGKAREGWVRLVGEKRQESLVHMQSQLCITLGYVQEYDYINLDPAVTMSLLTELKP.

G.gallus gene for gonadotrophin releasing hormone I

GenBank: X69491.1

FASTA Graphics

Go to:

LOCUS X69491 6282 bp DNA linear VRT 14-NOV-2006

DEFINITION G.gallus gene for gonadotrophin releasing hormone I.

ACCESSION X69491

VERSION X69491.1

KEYWORDS gonadotropin-releasing hormone; gonadotropin-releasing hormone-I; neuroendocrine protein.

SOURCE Gallus gallus (chicken)

ORGANISM Gallus gallus

Eukaryota; Metazoa; Chordata; Craniata; Vertebrata; Euteleostomi; Archelosauria; Archosauria; Dinosauria; Saurischia; Theropoda; Coelurosauria; Aves; Neognathae; Galloanserae; Galliformes; Phasianidae; Phasianinae; Gallus.

REFERENCE 1 (bases 1 to 6281)

AUTHORS Dunn,I.C., Chen,Y., Hook,C., Sharp,P.J. and Sang,H.M.

TITLE Characterization of the chicken preprogonadotrophin-releasing hormone-I gene

JOURNAL J. Mol. Endocrinol. 11 (1), 19-29 (1993)

PUBMED 7902095

REFERENCE 2

AUTHORS Dunn,I.

TITLE Direct Submission

JOURNAL Submitted (30-NOV-1992) I. Dunn, Institute of Animal Physiology and, Genetics Research, AFRC, Roslin, Midlothian EH 9PS, Scotland, UK

REMARK revised by [3] MAT

REFERENCE 3 (bases 1 to 6282)

AUTHORS Dunn,I.

TITLE Direct Submission

JOURNAL Submitted (31-MAY-1994) I. Dunn, Institute of Animal Physiology and, Genetics Research, AFRC, Roslin, Midlothian EH 9PS, Scotland, UK

COMMENT On Jun 4, 1994 this sequence version replaced gi:311611.

FEATURES Location/Qualifiers

source 1..6282

/organism="Gallus gallus"

/mol\_type="genomic DNA"

/strain="white leghorn"

/db\_xref="taxon:9031"

/clone="lambda52"

/sub\_clone="EDP1"

/clone\_lib="SAU3AI digest genomic library in EMBL3"

/dev\_stage="adult"

mRNA join(2996..3047,3485..3626,4296..4391,5899..5998)



```

exon      2996..3047
          /number=1
intron    3048..3484
          /number=1
exon      3485..3626
          /number=2
gene      order(3486..3626,4296..4391,5899..5940)
          /gene="cGnRH-I"
CDS       join(3486..3626,4296..4391,5899..5940)
          /gene="cGnRH-I"
          /codon_start=1
          /product="chicken gonadotrophin releasing hormone-I"
          /protein_id="CAA49246.1"
          /db_xref="GOA:P37042"
          /db_xref="InterPro:IPR002012"
          /db_xref="InterPro:IPR004079"
          /db_xref="InterPro:IPR019792"
          /db_xref="UniProtKB/Swiss-Prot:P37042"

/translation="MEKSRKILVGVLLFTASVAICLAQHWSYGLQPGGKRNAENLVES
             FQEIANEMESLGEQKKAECPGSYQHPRLSDLKETMASLIEGEARRKEI"
intron    3627..4295
          /gene="cGnRH-I"
          /number=2
exon      4296..4391
          /gene="cGnRH-I"
          /number=3
intron    4392..5898
          /gene="cGnRH-I"
          /number=3
exon      5899..5998
          /number=4

```

(2) For PLCB4 gene (Figure S15)

We have checked the Ensembl database release 84/87/89/90/91 and for example, for the duck genome, we did not find any annotation information including sequence "KKAVEDSEQEN". All the version of annotation information is as below.

>ENSAPLP00000013480.1 pep scaffold:BGI\_duck\_1.0:KB742503.1:690475:780114:1  
gene:ENSAPLG00000013577.1 transcript:ENSAPLT00000014232  
.1 gene\_biotype:protein\_coding transcript\_biotype:protein\_coding gene\_symbol:PLCB4  
description: phospholipase C beta 4 [Source:HGNCsymbol;Acc:HGNC:9059]  
MAKPYEFNWQKPVPSFMQDGA VFD RYEEESFVFESNCLFQVDEF GFFLSWKSEGKE  
GQVLECSLINSVRF GAIPKDPKILTAL EAVGKSENELEGRIVCVCSGTDLVNISFTFMVA  
ENTE  
IAKQWVEGLGSIHNF RANNVSPMTCLKKHWMKLAFLTNTNGKIPVRSITRTFASGKTE  
K  
VIFQALKELGLPSGKNDEIEPAAFTYDKFYELTQKICPRTDIEDL FK KINGDKTDYLTVD  
QLVSFLNEHQ RDPRLNEILFPFYDTKRAMQIIET YEPDEDL KSKGLISSDGF CRYLMSD  
E  
NAPVFLDRLELYQEMDHPLAHYFISSSHNTYLTGRQF GKGSSVEMYRQVLLAGCRCV  
ED  
CWDGKGEDQEPIITHGKAMCTDILFKDVIQAIKETAFTVSEYPVILSFENHCSKYQQYK  
M  
SKYCEDLFGDLLLKQPLETHPLDPGKALPSPNDLKRKILIKNKRLKPEVEKKQLDALKK  
M  
MEAGETAAPVNILEDNNEEEIESADQEEEAHPEYKFGSDLT VDDYCQKEAV AISVKKG  
LV  
TVEDEQAWMASYKYVGATTNIHPYLSTMVNYAQPVKFQGF DVAEERNIHHNMSSFN  
ESG  
LGYLKTHAIEFVNYNKRQMSRIYPKGRVDSSNYMPQIFWNAGCQMVSLNYQTPDLA  
ML  
NQGKFEYNGSCGYLLKPDFMRRPDRTDFPFSETPVDGVIAATCSVQVISGQFLSDKKI  
GT  
YVEVDMYGLPTD TIRKEFRTRMVMNGLNPVYN EESFVFRK VILPDLAVLRIAVYDDN

NK  
LIGQRILPLDGLQAGYRHISLRNEGNKPLSLPTVFCNIVLKYVVPDGFQDIVDALSDPKK  
FLSITEKRADQMRAMGIETSDIADVNDTSKNDRKGGKANNANVTPQSSSELRPSTT  
AG  
FGSGTDAKKGIDLIAQVKIEDLKQMKAYIKHLKQKQKELNALKKKHAKESAMQKLHC  
TQ  
IDKVVAQYDKEKVSYEKMLEKAIKKKGGSNVELKKETEIKIQALTSDHKSKVKEIVAQ  
H  
TKEWSEMINTHSAEEQEIRDHLNQQCELLKLLINAHEQQTQQLKFSDRESKEMR  
ANQ  
AKISMENSKAISQDKSIKNAERERRVRELNSSNTKKFLEERKRLAMKQSKEMDQLKK  
VQ  
LEHLEVLEKQNEQKQLLKSCHAVSQTQGGDAADGEAGSRDGSQASNSGLKPQHV  
N

(3) For ITPR1 gene (Figure S16)

We thought it was due to different version of annotation. We checked Ensembl database release 80/84/90/91 and did not find the sequence "MEGREPPPRGSKPE". Only in Ensembl database release 87 did we find it.

The authors then did a nice analysis of genes from the immune system. This was very insightful. Were these extra copies validated with RNAseq or IsoSeq data?

RE: We used RNAseq data to validate three gene families of Klf4 / ITCH / Foxa2 and the average coverage of all genes of each family by RNA reads was 90.32%, 91.33% and 88.23% respectively, which indicated that the expansion of gene families was real.

The authors also did an analysis of the 40 genomes they sequenced for correlation with plumage color. They found the CCDC171 as a candidate. The authors then added additional sequence data from 100 maroon and 100 yellow quails. This was an excellent addition to the study.

Suggestions \* Include NCBI genome IDs for other bird genomes used, since multiple versions are available

RE: We have supplied the corresponding version ID or websites of all used genomes. See at Methods section "Gene evolutionary analysis". See line 538-547.

\* I would have not done the saker falcon since it is redundant. The Peregrine falcon would have been enough. I would have added the budgie instead. That being said, I don't think it is necessary to redo the analysis with budgie.

RE: At the initial time of analysis, we added the budgie. However, we deleted it ultimately because we identified too few single copy genes when including this bird.

\* For figures S14, S15, S16, S17 were chicken IsoSeq reads used for analysis?

RE: In these figures, we used the RNAseq of quail for analysis. We did not use chicken IsoSeq reads.

\* BUSCO or CEGMA should have been used to determine completeness of all the individual quail genomes.

RE: BUSCO analysis were done for assembled genome, transcriptome and gene peptide set. We did not assemble all individual quail genomes because we only mapped the resequencing reads to the reference genome. We supplied BUSCO for the reference genome (Table S5) and the coverage of each individual quail reads to the reference genome.

\* Table S10 should be expanded to include the sequence coverage of all the individuals or an separate supplemental table should be created to include coverage and BUSCO summary.

RE: This is a similar question to the one above and we have supplied data in Table S11 and S12.

\* An average coverage of 3.5X of the entire data set is not very telling. Please report the standard deviation for the entire dataset. Also include the % mapped reads for each individual.

RE: We have increased the sequencing coverage to about 19X and supplied the mapping information (Table S12).

\* Based on the text in 217-220, I was expecting a phylogenetic tree in the supplement, rather than just a table.

RE: Figure 3a was the exact phylogenetic tree

\* In figures S14-S17, the authors may want to consider using a lighter shade coloring for easier reading.

RE: We agree with your opinion while we thought the current forms of these figures were ok for reading.

Minor comments \* From what population was the reference genome sequenced? Maybe I missed this?

RE: We have supplemented the information in methods section "Genome sequencing and assembly".

\* Nice decision to include a good balance of both males and females in the study.  
\* In table S6 you could add more information on the gene sets used for the homology based portion of the annotations. Was IsoSeq data used? IsoSeq data is available to several of the species listed in table S6.

RE: We only used RNAseq data.

\* In reference to table S8, was an alignment of the quail to the turkey done and not shown?

RE: Sorry, we did not carry out the alignment with turkey because our focus was mainly on the comparison with chicken.

Major criticisms \* It is unclear why the authors did not use one of the other quail genomes assemblies from other groups' efforts for mapping as opposed to creating their own. The main reference genome is not better than the recently assembly genomes. They could have spent their resources on higher coverage of the individuals in the population.

RE: More de novo assembly provides a chance for pan-genome analysis. Our new quail genome has been assembled at the chromosome level which is much more powerful when conducting GWAS-like study than the previously available genome.

\* 3.5X coverage is not enough coverage. The studies that I have read in the past two years have all had at least 8-10X coverage (6-8). Please give references to articles from journals showing that 3.5X coverage is enough. As genomics is a fast moving field, please only include articles published since 2015.

RE: We have increased the sequencing coverage to about 19X to improve the accuracy of SNP calling.

\* BUSCO or CEGMA was not shown to validate the quality of the reference genome. This should be in the supplement along with a comparison to the previously sequenced quail genomes. I have heard that you will report this separately. However, I would have liked to have seen the BUSCO or CEGMA analysis in this paper.

RE: We have supplied the BUSCO analysis of the reference genome. See Table S5.

Conclusion Overall, the authors did a very good job analyzing the population data they had. However, I do not think the high coverage sequencing of another reference genome added much value to the paper since the quail genome was already sequenced using a similar sequencing strategy (1). Based on the literature over the past couple years, I think studies should aim for a minimum of 10X coverage for resequencing. Given this opinion, I do not think this study is appropriate for Gigascience. However, if the editors feel 3.5X coverage is enough now or if the authors can show a number of recent papers with 3.5X or below coverage, then I will reconsider my opinion.

RE: We have increased the sequencing coverage to about 19X to improve the accuracy of SNPs calling. All data have been updated. Conclusions were drawn based on the updated data.

References 1.

[https://www.ncbi.nlm.nih.gov/assembly/GCA\\_001577835.1#/st](https://www.ncbi.nlm.nih.gov/assembly/GCA_001577835.1#/st) 2. Hackett SJ, Kimball RT, Reddy S, Bowie RC, Braun EL, Braun MJ, Chojnowski JL, Cox WA, Han KL, Harshman J, Huddleston CJ, Marks BD, Miglia KJ, Moore WS, Sheldon FH, Steadman DW, Witt CC, Yuri T. A phylogenomic study of birds reveals their evolutionary history. *Science*. 2008 Jun 27;320(5884):1763-8. doi: 10.1126/science.1157704. 3. Wang N, Kimball RT, Braun EL, Liang B, Zhang Z (2013) Assessing Phylogenetic Relationships among Galliformes: A Multigene Phylogeny with Expanded Taxon Sampling in Phasianidae. *PLoS ONE* 8(5): e64312. 4. Sibley CG, Ahlquist JE (1990) *Phylogeny and Classification of Birds: A Study in Molecular Evolution*. New Haven: Yale University Press. 5. Kimball and Braun (2014), Does more sequence data improve estimates of galliform phylogeny? *Analyses of a rapid radiation using a complete data matrix*. *PeerJ* 2:e361; DOI 10.7717/peerj.361 6. <https://www.illumina.com/science/education/sequencing-coverage.html> 7. David Sims, Ian Sudbery, Nicholas E. Iltott, Andreas Heger & Chris P. Ponting. Sequencing depth and coverage: key considerations in genomic analyses. *Nature Reviews Genetics* 15, 121-132 (2014) 8. Burri R, Nater A, Kawakami T, Mugal CF, Olason P, Smeds L, Suh A, Dutoit L, Bureš S, Garamszegi LZ, Hogner S, Moreno J, Qvarnström A, Ružić M, Sæther SA, Sætre GP, Török J, Ellegren H. Linked



|                                                                                                                                                                                                                                                                                                                                                                                                                                                                                                             |                                                                                                                                                                                                          |
|-------------------------------------------------------------------------------------------------------------------------------------------------------------------------------------------------------------------------------------------------------------------------------------------------------------------------------------------------------------------------------------------------------------------------------------------------------------------------------------------------------------|----------------------------------------------------------------------------------------------------------------------------------------------------------------------------------------------------------|
|                                                                                                                                                                                                                                                                                                                                                                                                                                                                                                             | selection and recombination rate variation drive the evolution of the genomic landscape of differentiation across the speciation continuum of Ficedula flycatchers. Genome Res. 2015 Nov;25(11):1656-65. |
| <b>Additional Information:</b>                                                                                                                                                                                                                                                                                                                                                                                                                                                                              |                                                                                                                                                                                                          |
| <b>Question</b>                                                                                                                                                                                                                                                                                                                                                                                                                                                                                             | <b>Response</b>                                                                                                                                                                                          |
| Are you submitting this manuscript to a special series or article collection?                                                                                                                                                                                                                                                                                                                                                                                                                               | No                                                                                                                                                                                                       |
| <b>Experimental design and statistics</b>                                                                                                                                                                                                                                                                                                                                                                                                                                                                   | Yes                                                                                                                                                                                                      |
| <p>Full details of the experimental design and statistical methods used should be given in the Methods section, as detailed in our <a href="#">Minimum Standards Reporting Checklist</a>. Information essential to interpreting the data presented should be made available in the figure legends.</p> <p>Have you included all the information requested in your manuscript?</p>                                                                                                                           |                                                                                                                                                                                                          |
| <b>Resources</b>                                                                                                                                                                                                                                                                                                                                                                                                                                                                                            | Yes                                                                                                                                                                                                      |
| <p>A description of all resources used, including antibodies, cell lines, animals and software tools, with enough information to allow them to be uniquely identified, should be included in the Methods section. Authors are strongly encouraged to cite <a href="#">Research Resource Identifiers</a> (RRIDs) for antibodies, model organisms and tools, where possible.</p> <p>Have you included the information requested as detailed in our <a href="#">Minimum Standards Reporting Checklist</a>?</p> |                                                                                                                                                                                                          |
| <b>Availability of data and materials</b>                                                                                                                                                                                                                                                                                                                                                                                                                                                                   | Yes                                                                                                                                                                                                      |
| <p>All datasets and code on which the conclusions of the paper rely must be either included in your submission or deposited in <a href="#">publicly available repositories</a> (where available and ethically appropriate), referencing such data using a unique identifier in the references and in the “Availability of Data and Materials” section of your manuscript.</p> <p>Have you have met the above requirement as detailed in our <a href="#">Minimum Standards Reporting Checklist</a>?</p>      |                                                                                                                                                                                                          |

**Population genomic data reveal genes related to important traits of quail**

1  
2  
3  
4  
5 Yan Wu<sup>1,3,6,\*</sup>, Yaolei Zhang<sup>2,5,11,\*</sup>, Zhuocheng Hou<sup>4,\*</sup>, Guangyi Fan<sup>2,5,8,11</sup>, Jinsong Pi<sup>1</sup>,  
6  
7  
8 Shuai Sun<sup>5</sup>, Jiang Chen<sup>2,11</sup>, Huaqiao Liu<sup>7</sup>, Xiao Du<sup>5</sup>, Jie Shen<sup>1</sup>, Gang Hu<sup>5</sup>, Wenbin  
9  
10 Chen<sup>2</sup>, Ailuan Pan<sup>1</sup>, Pingping Yin<sup>5</sup>, Xiaoli Chen<sup>2</sup>, Yuejin Pu<sup>1</sup>, He Zhang<sup>2</sup>, Zhenhua  
11  
12 Liang<sup>1</sup>, Jianbo Jian<sup>2</sup>, Hao Zhang<sup>1</sup>, Bin Wu<sup>2</sup>, Jing Sun<sup>1</sup>, Jianwei Chen<sup>2</sup>, Hu Tao<sup>1</sup>, Ting  
13  
14 Yang<sup>2</sup>, Hongwei Xiao<sup>1</sup>, Huan Yang<sup>2</sup>, Chuanwei Zheng<sup>1</sup>, Mingzhou Bai<sup>2</sup>, Xiaodong  
15  
16 Fang<sup>2</sup>, David W. Burt<sup>9</sup>, Wen Wang<sup>10</sup>, Qingyi Li<sup>5</sup>, Xun Xu<sup>2,11</sup>, Chengfeng Li<sup>5</sup>,  
17  
18  
19 Huanming Yang<sup>2,12</sup>, Jian Wang<sup>2,12</sup>, Ning Yang<sup>4</sup>, Xin Liu<sup>2,11,†</sup>, Jinping Du<sup>1,†</sup>  
20  
21  
22  
23  
24  
25  
26  
27  
28  
29  
30  
31  
32  
33  
34  
35  
36  
37  
38  
39  
40  
41  
42  
43  
44  
45  
46  
47  
48  
49  
50  
51  
52  
53  
54  
55  
56  
57  
58  
59  
60  
61  
62  
63  
64  
65



1  
2  
3  
4  
5  
6  
7  
8  
9  
10  
11  
12  
13  
14  
15  
16  
17  
18  
19  
20  
21  
22  
23  
24  
25  
26  
27  
28  
29  
30  
31  
32  
33  
34  
35  
36  
37  
38  
39  
40  
41  
42  
43  
44  
45  
46  
47  
48  
49  
50  
51  
52  
53  
54  
55  
56  
57  
58  
59  
60  
61  
62  
63  
64  
65

33 **Conclusions:** This study provided a high-quality quail reference genome, identified  
34 quail-specific genes and resolved quail phylogeny. We have identified genes related to  
35 quail early maturation and a marker for plumage color which is significant for quail  
36 breeding. These results will facilitate biological discovery in quails and help us  
37 elucidate the evolutionary process within the Phasianidae family.

38 **Keywords:** Japanese quail, genome assembly, early maturation, phylogeny,  
39 resequencing, plumage color, quail breeding

## 40 Background

41 Most of the poultry eggs and meat products in the world come from species that  
42 are members of the Phasianidae family including chicken (*Gallus gallus*), turkey  
43 (*Meleagris gallopavo*) and Japanese quail (*Coturnix japonica*) within the order  
44 Galliformes. The genomes of the two widely domesticated avian species, chicken and  
45 turkey, have already been sequenced [1, 2]. Accordingly, the first quail draft genome  
46 sequence was reported with the N50 contig length of 1.5 kb by Tokyo University of  
47 Agriculture in 2013. Subsequently, the same group developed an improved draft and  
48 extended the N50 contig length to 32 kb (NCBI BioSample: SAMD00009971) [3].  
49 Recently, another chromosome-level draft genome for the Japanese quail was  
50 published by using the quail inbred line, Cons DD (INRA) (NCBI BioSample:  
51 SAMN03989050). However, with these reference quail genome assemblies, most  
52 biological questions involving genomics and phylogenetics are still unresolved.

53 The Phasianidae family has its origin about 30–46 million years ago (MYA) [1,  
54 4-7]. Even though high degrees of conservation of synteny and chromosome  
55 homology have been observed between quail and chicken [8, 9], these species display  
56 a great diversity of phenotypes among the three widely used domesticated birds.  
57 Japanese quail reach sexual maturity at 5–6 weeks of age [10], while chicken and  
58 turkey reach this stage in about 18–22 weeks [11]. Body mass at the maturity stage of  
59 meat-type quail is about 10% that of broiler chicken and 2.5% that of turkey [11], yet  
60 quail have the fastest growth rate of all species in the Phasianidae family [12, 13].  
61 Furthermore, female quails generally present a heavier body weight than males [14],

1 62 while the reverse is true both in chickens and turkeys [15]. In addition, there are very  
2  
3 63 distinct differences between subpopulations of quail, even though quail branched off  
4  
5  
6 64 from the Phasianidae family fairly recently [16]. According to historical records, the  
7  
8  
9 65 domestication of Japanese quail began in the 11<sup>th</sup> century and was initially based on  
10  
11  
12 66 birds selected for their crowing abilities [16]. However, the resulting domestic strains,  
13  
14  
15 67 which were selected for commercial egg and meat productions, were improved only  
16  
17  
18 68 from 1910s [17] . Today, the domestic quail differs from the wild population in many  
19  
20  
21 69 traits, such as variations in plumage color, increased body size, acceleration of sexual  
22  
23  
24 70 maturity, lengthening of the reproductive phase, and the disappearance of migratory  
25  
26  
27 71 characteristics [18]. Because of the important roles of plumage color in signaling,  
28  
29  
30 72 mate choice and evolution, mapping the gene conferring sex-linked plumage color is  
31  
32  
33 73 significant for commercial breeding in quail [13, 17-20]. Additionally, it has been  
34  
35  
36 74 established that the quail has an advantage over the chicken concerning reproduction  
37  
38  
39 75 interval and space requirements, so the quail is also considered to be an excellent  
40  
41  
42 76 avian model for embryonic development, reproduction, sexual differentiation,  
43  
44  
45 77 environmental toxicant indication and disease resistance [19-27].

46 78 The phylogeny and genetic relationships for some of the key avian model systems  
47  
48 79 (e.g. chicken, turkey, and Japanese quail) are not well resolved [28]. Even though a  
49  
50  
51 80 preliminary understanding of Phasianidae phylogenies has been gained via  
52  
53  
54 81 archaeologic and demographic techniques, the evolution of the Phasianidae family is  
55  
56  
57 82 still under debate. Now that sequencing data are available, several conclusions that  
58  
59  
60 83 were drawn about Phasianidae evolution based on fossil evidence are inconsistent

1 84 with results from mtDNA analysis, mainly those concerning phylogenies and  
2  
3 85 divergence time. We believe this is likely due to the rapid diversification of the  
4  
5  
6 86 Phasianidae family [5, 6, 29]. Because of this rapid diversification (observed during  
7  
8  
9 87 the Eocene), as well as the short divergence times within some lineages, the  
10  
11 88 phylogenies of galliform birds (including chicken, turkey and quail) usually have low  
12  
13  
14 89 bootstrap support values [30]. Phylogenies based on the *CRI* retrotransposon support  
15  
16  
17 90 the hypothesis that quail and turkey are more closely related than quail and chicken,  
18  
19  
20 91 while those based on mitochondrial genome data support the hypothesis that quail is  
21  
22  
23 92 more closely related to chicken than turkey [30]. However, phylogenies of the  
24  
25 93 *Perdicinae* (Japanese quail), *Meleagridinae* (turkey) and *Phasianinae* (chicken)  
26  
27  
28 94 subfamilies are still not clear based only on information that is inferred from either  
29  
30  
31 95 current fossil evidence or partial genome data. Therefore, comparing these species at a  
32  
33  
34 96 whole-genome level will enable us to better understand the process of speciation of  
35  
36  
37 97 *Phasianidae* family. A high-quality genome assembly of the quail with population  
38  
39  
40 98 genomic data of the quail is necessary to address these questions [30, 31].

41  
42 99 Here, we report the completion of an additional genome assembly of Japanese  
43  
44  
45 100 quail (*Coturnix japonica*), as well as the resequencing of 71 quail, both domestic and  
46  
47  
48 101 wild, and we describe experimental results concerning several important quail traits.  
49  
50  
51 102 These results were then used to characterize the mechanisms of early sexual maturity  
52  
53 103 in quail; resolve the phylogeny and divergence time of the *Phasianidae* family; and  
54  
55  
56 104 detect footprints of artificial selection in the quail genome. We have also identified the  
57  
58  
59 105 genetic basis for a plumage color marker that is widely used in quail breeding. These

1 106 results will facilitate biological discovery, the improvement of quail for meat and egg  
2  
3 107 production, and help resolve the basis of evolution within the Phasianidae family.  
4  
5  
6

## 7 108 **Results**

### 9 10 109 **Characteristics of the quail genome**

11  
12  
13  
14 110 High-quality genomic DNA extracted from a female quail (Shendan quail 1) was  
15  
16 111 used to generate 262Gb of sequence (approximately 238-fold coverage of the whole  
17  
18 112 genome) (**Table S1**) using the Illumina HiSeq 2000 platform. The genome assembled  
19  
20 113 using SOAP*denovo2* [32] spans 1.04Gb (93.9% of the estimated genome size for  
21  
22 114 quail, **Figure S1**) with contig N50 and scaffold N50 lengths of 27.9 kb and 1.8 Mb,  
23  
24 115 respectively (**Table S2**). About 901 Mb of sequence (86.6% of the whole genome)  
25  
26 116 was anchored to 30 chromosomes using a previously reported genetic linkage map [33]  
27  
28 117 (**Figure 1a**). We aligned these chromosomes back to a previously reported quail  
29  
30 118 genome assembly (NCBI BioSample: SAMN03989050) and found that the two  
31  
32 119 genomes had a high degree (92.14%) of consistency (**Figure S2**). The length and GC  
33  
34 120 distribution of chromosomes are also highly consistent between quail and chicken  
35  
36 121 genome sequences (**Figure 1b** and **Figure S3**). To evaluate the quality of the  
37  
38 122 assembled quail genome, seven fosmid clones, each about 40 kb in length, were  
39  
40 123 sequenced and mapped back to the quail genome assembly with a high coverage ratio  
41  
42 124 (>92% for all, and six of seven fosmids >98.4%) (**Table S3** and **Figure S4**). To assess  
43  
44 125 the integrity of protein-coding genes in the quail genome assembly, all transcripts  
45  
46 126 assembled from RNA-Seq data sampled from the hypothalamus and ovary of three  
47  
48  
49  
50  
51  
52  
53  
54  
55  
56  
57  
58  
59  
60  
61  
62  
63  
64  
65



1 127 stages of quail maturity (before-laying (BL), laying (L) and peak-laying (LP)), were  
2  
3 128 mapped to the assembled genome (**Table S4**) and ~96.33% of total complete BUSCO  
4  
5  
6 129 genes can be identified in the genome (**Table S5**). These measures demonstrated the  
7  
8  
9 130 high quality of our genome assembly, allowing it to serve as a reference genome for  
10  
11  
12 131 subsequent quail genome research.

13 132 Genome annotation of our quail genome assembly included transposable  
14  
15  
16  
17 133 elements (TEs) and protein-coding genes. TEs comprise 12.4% of the genome, which  
18  
19  
20 134 is a little higher than the average value in the class Aves [34], and 9.4% of the genome  
21  
22  
23 135 consists of long interspersed nuclear elements (LINEs) (**Figure 1a** and **Table S6**).  
24  
25  
26 136 Gene prediction was performed using a combination of several methods, including  
27  
28  
29 137 homology searches, *ab initio* prediction and RNA-Seq data. The merged results  
30  
31  
32 138 revealed evidence for 16,210 protein-coding genes in the quail genome (**Table S7**),  
33  
34 139 and 15,972 (~98.5%) genes were supported by known protein-coding entries in at  
35  
36  
37 140 least one of the following databases: Swiss-Prot, InterPro, GO, TrEMBL or KEGG  
38  
39  
40 141 (**Table S8**).

#### 41 42 43 142 **Evolutionary relationships within the Phasianidae family**

44  
45  
46  
47 143 To resolve the phylogenetic debate in the Phasianidae family and establish the  
48  
49  
50 144 phylogenetic position of the quail in relation to other avian species, we defined 12,178  
51  
52  
53 145 gene families in quail and 10 other representative bird species, with *Alligator sinensis*  
54  
55 146 (Chinese alligator) serving as an outgroup (**Figure S5**). 9,631 gene families were  
56  
57  
58 147 shared among four species (*Taeniopygia guttata*, *Pseudopodoces humilis*, *Gallus*

1 148 *gallus* and *Coturnix japonica*, **Figure S6**) and 4,393 single-copy orthologs were  
2  
3  
4 149 shared among 12 species. These single-copy orthologous genes were used to construct  
5  
6 150 a phylogenetic tree (**Figure 2a** and **Figure S7**) and estimate the divergence times of  
7  
8  
9 151 the quail from other birds. Quail was mapped to the evolutionary branch containing  
10  
11 152 domesticated poultry and was most closely related to the chicken lineage, sharing a  
12  
13 153 common ancestor about 22.2 MYA (**Figure 2a**). We used our genome-wide  
14  
15  
16  
17 154 comparative data to estimate the divergence time of Galliformes and Anseriformes at  
18  
19  
20 155 69.1 (64.5–75.4) MYA. Our results, therefore, fully support a closer relationship  
21  
22 156 between quail and chicken than between quail and turkey. The phylogeny we  
23  
24  
25 157 generated implied that the quail and chicken genomes likely share significant  
26  
27  
28 158 similarities which makes further comparison of their genomes intriguing.

31  
32 159 In total, 95.5% of quail genome sequences occurred in blocks colinear with those  
33  
34 160 in chicken (**Figure 2b** and **Table S9**). However, a total of 131 large inversions (block  
35  
36  
37 161 length >5 kb) between quail and chicken chromosomes were also identified and most  
38  
39  
40 162 of these were located on chromosomes 1 (24 breakpoints) and Z (24 breakpoints)  
41  
42 163 (**Table S10**). Next, to investigate the nature of chromosome breaks that differentiate  
43  
44  
45 164 the quail and chicken genomes, and to associate these differences with possible  
46  
47  
48 165 phenotypic changes during their divergence, we tested for gene set enrichments at the  
49  
50  
51 166 boundaries. We identified 433 genes located within the 1 kb regions flanking the  
52  
53 167 breakpoints of these inversions (**Table S10**). We tested for gene function enrichment  
54  
55  
56 168 within these inversions and searched for candidate mutations that might contribute to  
57  
58  
59 169 specific phenotypes in quail compared with chicken. The results of GO term

1 170 enrichment analysis of these genes revealed the terms GO:0005882: intermediate  
2  
3 171 filament ( $P=1.53e-05$ ) and GO:0005200: structural constituent of cytoskeleton  
4  
5  
6 172 ( $P=0.00029$ ) were significantly enriched (**Figure S8** and **Figure S9**). In particular, a  
7  
8  
9 173 gene encoding tyrosinase-related protein 1 (*TYRPI*) was identified in the flanking  
10  
11  
12 174 region of an inversion on chromosome Z, which has been reported as a candidate  
13  
14  
15 175 locus for the recessive, sex-linked roux (br(r)) phenotype in Japanese quail [35]  
16  
17 176 (**Figure 2c**).

### 177 **Nucleotide diversity and population structure**

178 To obtain a comprehensive understanding of genetic diversity in a quail  
179 population, we collected a total of 31 samples for genome re-sequencing, which  
180 includes 10 quails from wild population, 11 egg-type quails and 10 meat-type quails  
181 from domesticated subpopulations (**Table S11**). We sequenced these samples with an  
182 average read depth of 19X and mapped the reads to our reference genome (Shendan  
183 quail 1) with average coverage of 96.72% (**Table S12**). Eventually, we identified a  
184 total of 43,108,723 biallelic SNPs (single nucleotide polymorphisms) among the 31  
185 re-sequenced samples, which included 21,597,713, 18,966,964 and 35,182,459 SNPs  
186 in wild quails, egg-type quails and meat-type quails, respectively (**Table 1**). Of the  
187 ~43M high-quality SNPs, only 649,024 SNPs were located in exonic regions, yet  
188 there were 17,227,986 SNPs in intron regions. Thus, the ratio of the number of SNPs  
189 in exons and introns was  $3.77e-3$ , roughly equivalent to that of turkey ( $4.30e-2$ ) [36]  
190 and chicken ( $3.50e-2$ ) [37]. Accordingly, we found that the non-synonymous SNPs (N)

1 191 and the synonymous SNPs (*S*) in quail were 202,742 and 446,282, respectively, with a  
2  
3 192 ratio of *N/S* of 0.454, which don't show a significant difference to chicken (0.41) or  
4  
5  
6 193 turkey (0.45). To evaluate the genetic diversity of our quail population, we calculated  
7  
8  
9 194 two common summary statistics across the whole genome,  $\pi$  and  $\theta_w$  [38, 39], by using  
10  
11 195 100 kb sliding overlapped window with step length of 10 kb (**Table 1** and **Table S13**).  
12  
13  
14 196 Compared to the two domesticated subpopulations, the wild quail population  
15  
16  
17 197 displayed both higher  $\pi$  and higher  $\theta_w$  on autosomes, indicating greater genetic  
18  
19  
20 198 diversity in the wild population. The same pattern was found on chromosome Z. The  
21  
22  
23 199 genetic diversity on chromosome Z was reduced compared to the autosomes in all  
24  
25  
26 200 three populations, a phenomenon which has been observed in a variety of other ZW  
27  
28 201 system studies [40, 41]. The fact that sex chromosomes and autosomes differ in their  
29  
30  
31 202 effective population size, mutation characteristics and demography contributes to the  
32  
33  
34 203 differential genetic diversity within the genome [42].  
35  
36

37 204 To investigate the phylogenetic relationships and population structure among the  
38  
39  
40 205 31 quail samples (**Table S11**), we constructed a neighbor-joining tree by using  
41  
42  
43 206 pairwise genetic distance matrix (**Figure 3a**) and performed principal component  
44  
45  
46 207 analysis (PCA) based on the variance-standardized genotype relationship matrix  
47  
48  
49 208 (**Figure 3b**). The neighbor-joining tree showed that our samples could be divided into  
50  
51  
52 209 two major clusters, corresponding to wild quails and domesticated quails, with a  
53  
54  
55 210 further subdivision of domesticated quails into egg-type quails and meat-type quails.  
56  
57  
58 211 This pattern was further confirmed by the PCA results. Specifically, the first principal  
59  
60  
61 212 component (PC1) in PCA successfully separated the wild from the domesticated  
62  
63  
64  
65

1 213 populations, and the second principal component (PC2) separated the egg-type and  
2  
3 214 meat-type quails (**Figure 3b**). In order to better estimate the ancestral component in  
4  
5  
6 215 our quail populations, we adopted likelihood models embedded in structure by using  
7  
8  
9 216 ADMIXTURE [43]. The initialization of population number ( $K$ ) was tried from 2 to 5,  
10  
11  
12 217 and the minimum estimated cross-validation error occurred with  $K=2$  (**Figure 3d** and  
13  
14 218 **Figure S10**). These results suggest that there was a distinct background between the  
15  
16  
17 219 wild population and domesticated population, similar to the results observed in NJ  
18  
19  
20 220 tree and PCA. The likelihood model based on  $K=2$  grouped the three quail  
21  
22 221 populations into two genetic clusters (**Figure 3d**), one which includes the wild quails  
23  
24  
25 222 and another that includes the domesticated quails. Considering the physiological and  
26  
27  
28 223 ethological characteristics of the quails investigated, we would have preferred to  
29  
30  
31 224 divide the 31 samples into three populations (egg-type, meat-type and wild quail).  
32  
33  
34 225  $K=3$  actually provides strong support for this scenario. This model groups the egg,  
35  
36 226 meat, and wild quails into three distinct genetic clusters (**Figure 3d**), and the slight  
37  
38  
39 227 mixing shown between the egg- and meat-types could also explain the spread along  
40  
41  
42 228 the PC2 axis in the PCA plot. To characterize linkage disequilibrium (LD) blocks in  
43  
44  
45 229 wild and domesticated quails, we estimated the squared correlations ( $r^2$ ) of pairwise  
46  
47  
48 230 SNPs with sliding window lengths from 1 to 50 kb. LD decayed to half of its  
49  
50  
51 231 maximum within a window length of ~20 bp for wild quail, ~100 bp for egg-type  
52  
53 232 quail and ~230 bp for meat-type quail, respectively (**Figure 3c**). Such a rapid decay of  
54  
55  
56 233 LD in each population might be due to the high density of SNPs in the quail genome  
57  
58  
59 234 (one SNP in every ~20 bases, on average), and a high degree of recombination within

1 235 the quail genome. Similarly, other studies involving the population structure of Aves  
2  
3 236 animals also revealed the low level of LD corresponding to the open genome and fluid  
4  
5  
6 237 genomic background in bird population which could facilitate adaptive variation [44,  
7  
8  
9 238 45].

### 10 11 239 **Signals of selection across the quail genome**

12  
13  
14  
15 240 Due to the low level of population divergence in our wild quails, any evidence of  
16  
17  
18 241 selective sweeps in short genomic regions could be masked in domesticated  
19  
20  
21 242 populations. Thus, we sought to detect the large-scale regions in the whole genome  
22  
23  
24 243 that may have been subjected to successive selective sweeps between the  
25  
26  
27 244 domesticated and wild populations by using 100 kb overlapping sliding window in 10  
28  
29 245 kb step. The reduction of diversity (ROD), defined as  $ROD = 1 - \pi_{\text{domesticated}}/\pi_{\text{wild}}$ , was  
30  
31  
32 246 introduced to measure the loss of diversity in the domesticated population compared  
33  
34  
35 247 to the wild population. Additionally, in order to avoid ROD being excessively affected  
36  
37  
38 248 by diversity in the wild population, we also added a significantly negative Tajima's  $D$   
39  
40 249 ( $D < -2$ ) in the domesticated population as a parallel criterion, which could represent a  
41  
42  
43 250 recent selective sweep or population expansion following a strong bottleneck [46-48].  
44  
45  
46 251 From the comparison between egg-type quails and wild quails, we identified a total of  
47  
48  
49 252 18 large-scale regions of selection sweep with the spans all greater than 100 kb, where  
50  
51  
52 253 the sliding windows presented high ROD values and a small Tajima's  $D$  in the 1% tail  
53  
54 254 of the distribution (**Figure S11** and **Table S14**). The fixation index ( $F_{ST}$ ), a measure of  
55  
56  
57 255 population divergence due to genetic structure, was substantially used as an additional  
58  
59  
60 256 condition to infer selection sweep at a high level ( $F_{ST} > 0.3$ ). We identified 18

1 257 selective sweep regions with total length of 7.9 Mb between egg-type quail and wild  
2  
3  
4 258 quail. Interestingly, we observed the longest 1.8 Mb sweep region was located on  
5  
6 259 chromosome Z and the length of sweep regions on chromosome Z was up to 5.57 Mb  
7  
8  
9 260 (**Figure 3e**). Furthermore, we noticed a gene (*CCDC171*) which is significantly  
10  
11 261 associated with quail plumage color, was just located on the longest region and  
12  
13 262 included in a 182 kb haplotype block (*see the association study described below*).  
14  
15  
16  
17 263 This may indicate that positive selection for plumage color might have resulted in a  
18  
19  
20 264 strong selective sweep on chromosome Z in egg-type quail. A total of 88 genes  
21  
22 265 involving these selective sweeps have been annotated Gene Ontology (GO) terms. By  
23  
24  
25 266 using the Kyoto Encyclopedia of Genes and Genomes (KEGG) database, we noticed  
26  
27  
28 267 that some of these genes possibly played a role in sex hormones [49], embryo  
29  
30  
31 268 development [50, 51], increase of egg weight [52] and plumage color [53] (**Table**  
32  
33  
34 269 **S15**). Thus, we surmise that these important traits in egg-type quail might have  
35  
36 270 suffered stronger artificial selection, leading to many large-scale selection sweeps on  
37  
38  
39 271 chromosome Z. Similarly, we also identified 26 large regions of selective sweep  
40  
41  
42 272 between meat-type quail and wild quail on chromosomes 1, 2, 13 and Z (**Figure S11**  
43  
44  
45 273 and **Table S16**). The total length of selective sweeps in meat-type quail was estimated  
46  
47  
48 274 at ~8.77 Mb, and the longest span could be as long as 1.2 Mb on chromosome 2. That  
49  
50  
51 275 led us to infer that breed improvement for meat-type quail was likely not restricted to  
52  
53 276 chromosome Z, but could affect many other genomic regions. Subsequently, we  
54  
55  
56 277 annotated the biological functions of 118 genes in those meat-type quail sweep  
57  
58  
59 278 regions (**Table S17**). Although most of genes that correspond to relevant traits had not  
60  
61  
62  
63  
64  
65

1 279 been previously verified in meat-type quail, a more detailed investigation of these  
2  
3 280 candidate genes could further our understanding of the domestication process in  
4  
5  
6 281 future studies. However, it is worth mentioning that there was hardly any selective  
7  
8  
9 282 sweep shared between wild quail and egg-type quail, or between wild quail and  
10  
11  
12 283 meat-type quail except for a 130 kb region (40.15-40.28 Mb) on chromosome 4 which  
13  
14  
15 284 contains one annotated gene: COT02188 (vascular endothelial growth factor C/D)  
16  
17 285 (**Table S15** and **Table S17**). With such differentiated large selective sweeps, we  
18  
19  
20 286 speculate that egg-type quail and meat-type quail might have undergone selection  
21  
22  
23 287 independently subsequent to their initial domestication in the early 20<sup>th</sup> century [17].  
24  
25

26 288 Despite that selective sweep gave us a new insight into an evidence of  
27  
28  
29 289 domestication process, we also found that a number of functional genes dispersed  
30  
31  
32 290 across the whole genome were contributed to the divergent traits observed when  
33  
34  
35 291 comparing domesticated quails and wild quails. Thus, we picked up the highly  
36  
37  
38 292 differentiated non-synonymous SNPs with  $F_{st}$  values over 0.5, that show high  
39  
40  
41 293 population differentiation in the between wild and egg-type population. Specifically,  
42  
43  
44 294 we found 1,943 highly differentiated non-synonymous SNPs in 1,213 genes between  
45  
46  
47 295 egg-type and wild quail; and 3,508 highly differentiated non-synonymous SNPs in  
48  
49  
50 296 2,032 genes between meat-type and wild quail. We then performed functional  
51  
52  
53 297 enrichment analysis of KEGG pathways using these sets of genes for both egg-type  
54  
55  
56 298 quail and meat-type quail and found that 8 of the top 20 most enriched pathways were  
57  
58  
59 299 shared by egg-type and meat-type quail (**Figure S12** and **Figure S13**). Of these, the  
60  
61  
62 300 most significantly enriched pathway was ECM-receptor interaction (ko04512), an  
63  
64  
65



1 301 activity which plays important roles in both the integrity of tissue and intramuscular  
2  
3 302 fat metabolism [54]. Other functional pathways, specific to either egg-type or  
4  
5  
6 303 meat-type quail, were not significantly enriched, indicating that artificial selection  
7  
8  
9 304 targeting these traits was not strong. In summary, the independent selection for similar  
10  
11  
12 305 traits in the two domesticated subpopulations suggests that the phenotypic difference  
13  
14  
15 306 between egg-type and meat-type quail is not that significant, which is consistent with  
16  
17  
18 307 the observation during the population stratification analysis that the optimal number  
19  
20  
21 308 of populations was two rather than three.

### 24 309 **Genes involved in early sexual maturity**

27 310 To explore the biological mechanism of very early sexual maturity in quail,  
28  
29  
30 311 genes were traced from both gene family evolution and positive selection events in  
31  
32  
33 312 the quail lineage. We found that several gene families have expanded in the quail  
34  
35  
36 313 genome compared with those of other domesticated birds. These families include  
37  
38  
39 314 those encoding gonadotropin-releasing hormone 1 (*GnRH1*, **Figure S14**), the  
40  
41  
42 315 lysophospholipase catalytic domain and phospholipase A2 (**Table S18**). Moreover,  
43  
44  
45 316 four positively selected genes (PSGs) were detected in the quail lineage and the  
46  
47  
48 317 proteins encoded by these genes (*FSH $\beta$* , *PLCB4*, *ITPR1* and *PLA2G4*) are involved in  
49  
50  
51 318 the *GnRH* (gonadotropin-releasing hormone) signaling pathway. Follicle stimulating  
52  
53  
54 319 hormone *beta* (*FSH $\beta$* ) protein, is a glycoprotein polypeptide hormone that, in  
55  
56  
57 320 conjunction with luteinizing hormone, contributes to growth and reproduction [55].  
58  
59  
60 321 Transcription of the *FSH $\beta$*  gene is the rate-limiting step in hormone synthesis [56]

1 322 which is required for ovarian folliculogenesis in females and for spermatogenesis in  
2  
3 323 males, in conjunction with testosterone [57]. We identified two amino acids in the  
4  
5  
6 324 quail *FSH $\beta$*  protein at position 37 (M→F/L) and position 99 (G→E/A) that were  
7  
8  
9 325 predicted to be under positive selection (**Figure 4a**). We used ELISA to measure the  
10  
11 326 level of *FSH $\beta$*  protein during early developmental stages and found that the level of  
12  
13 327 *FSH $\beta$*  in early-maturing quail blood is consistently higher than that in chicken  
14  
15 328 ( $P<0.05$ ) (**Figure 4c**). We used SWISS-MODEL to model the structure of quail *FSH $\beta$*   
16  
17 329 using the Follitropin subunit beta (4ay9.1.B) protein[58] as a template. These two  
18  
19 330 amino acid substitutions were mapped to the 3D protein structure and were located  
20  
21 331 near the  $\beta$ -pleated sheet that interacts with the *FSH* receptor (**Figure 4b**). *PLCB4*,  
22  
23 332 *ITPR1* and *PLA2G4* (**Figure S15-17**), together with other molecules (e.g., inositol  
24  
25 333 1,4,5-trisphosphate, diacylglycerol and protein kinase C) stimulate release of  
26  
27 334 gonadotropins including luteinizing hormone and follicle stimulating hormone [59,  
28  
29 335 60]. Gene expansions in the *GnRH* families, and also PSGs in the *GnRH* signaling  
30  
31 336 pathway, are likely to be involved in the acceleration of growth and sexual maturity in  
32  
33 337 the quail. Subsequently, we scanned both synonymous and non-synonymous SNPs  
34  
35 338 found in the coding sequence (CDS) of these four genes in the 31 wild and domestic  
36  
37 339 individuals, and found that all but four of the 83 SNPs were synonymous substitutions.  
38  
39 340 However, all the divergent alleles of SNP loci did not generally segregate according to  
40  
41 341 the three subpopulations, and the domestic and wild quails presented no large-scale  
42  
43 342 selective sweeps around these genes.  
44  
45  
46  
47  
48  
49  
50  
51  
52  
53  
54  
55  
56  
57  
58  
59

#### 60 343 **Gene families related to immune system function**

1 344 We identified a total of 1,587 immune response-related genes in quail (**Table S19**)  
2  
3 345 by aligning the entire predicted gene set of quail against 2,257 genes that have been  
4  
5  
6 346 annotated with roles in the innate immune responses of *Homo sapiens*, *Mus musculus*  
7  
8  
9 347 or *Bos taurus* at InnateDB or Gene Ontology databases. Compared to chicken, turkey  
10  
11  
12 348 and duck, several expanded gene families were identified in quail. These included  
13  
14 349 *Klf4*, which is indispensable for differentiation of inflammatory monocytes [61] and  
15  
16  
17 350 negative regulation of innate immune response against several viruses in human  
18  
19  
20 351 embryonic kidney 293 cells [62] (22 copies in quail, 17 in chicken, 16 in turkey and  
21  
22  
23 352 12 in duck); *Foxa2*, which regulates genetic programs that influence pulmonary  
24  
25  
26 353 inflammation mediated by Th2 cells [63] (13 copies in quail, 7 in chicken, 4 in turkey  
27  
28  
29 354 and 5 in duck); and *ITCH*, which acts in T-helper cell differentiation and T-cell  
30  
31  
32 355 activation and tolerance [64] (7 copies in quail, 3 in chicken, 4 in turkey and 2 in  
33  
34  
35 356 duck). Moreover, we focused on the number of ‘Immunoglobulin subtype’ genes and  
36  
37  
38 357 found that there are 109 in quail, while chicken, duck, zebra finch (*Taeniopygia*  
39  
40  
41 358 *guttata*) and turkey each had 62 or fewer immunoglobulin-related genes (62 copies in  
42  
43  
44 359 chicken, 29 in duck, 29 in zebra finch and 34 in turkey; **Figure 4d**). We detected 69  
45  
46  
47 360 genes encoding a putative ‘Reverse transcriptase or Reverse transcriptase domain’ in  
48  
49  
50 361 quail but found only two and four such genes in chicken and turkey, respectively  
51  
52  
53 362 (**Figure S18**). These domains are signatures of retroviruses integrated into the host  
54  
55  
56 363 genome. Next we compared the *MHC-B* region between quail and chicken (**Figure**  
57  
58  
59 364 **S19**) and found that there was an inversion including the genes encoding the proteins  
60  
61  
62 365 *TAP1* and *TAP2*, which transport peptides from the cytosol into the endoplasmic

1 366 reticulum to bind *MHC* class I molecules that are being synthesized [65], and *BFIV21*,  
2  
3 367 which encodes a protein that presents antigens such as the avian leukosis virus [66].  
4  
5  
6 368 We also found four copies of the *BLEC2* (C-type lectin-like NK cell receptor) gene in  
7  
8  
9 369 quail, but only one in chicken. However, several other *MHC* genes (e.g., *KIFC1*,  
10  
11 370 *V-BG1* and *BG2*) were not detected in the quail genome. A better understanding of  
12  
13  
14 371 these immune-related genetic changes will help us characterize the immune response  
15  
16  
17 372 in quail and facilitate the development of targeted vaccines for quail.  
18  
19

20 373

#### 21 374 **Genome wide association analysis of plumage color**

22  
23  
24  
25  
26 375 In order to identify sexed-linked genes conferring plumage color, we bred a set of  
27  
28  
29 376 egg-type quails with maroon or yellow plumage, a trait that has been confirmed to  
30  
31  
32 377 have sex-linked inheritance in quail, and is consistent with a Mendelian segregation  
33  
34  
35 378 ratio according to our previous investigation (*see more details in Method*). From this  
36  
37  
38 379 set we sampled 40 quails, including 20 male and 20 female quails, and re-sequenced  
39  
40  
41 380 their genomes for case-control analysis (**Table S20**). We identified ~20M bi-allelic  
42  
43 381 SNPs in these 40 quails at a sequencing depth of 20–30×. After controlling for SNP  
44  
45  
46 382 quality and redundant LD (*see more details in Methods*), a final total of 864,292 SNPs  
47  
48  
49 383 was retained for subsequent analyses. A genome similarity test of the 40 quail samples  
50  
51  
52 384 was conducted using high-quality SNPs, and we found that similarities between any  
53  
54 385 pair of individuals ranged from 70.4 to 86.5%, indicating relatively high homology  
55  
56  
57 386 between them.  
58

59  
60 387 Due to the relatively close relationships between the 40 samples, the effect of

1 388 relativity matrix affecting the variance of plumage color was considered as the  
2  
3 389 covariance. We assessed the relationships matrix of the 40 samples by using GEMMA  
4  
5  
6 390 v0.94 [67] and adopted the linear mixed model for association analysis. By  
7  
8  
9 391 Bonferroni correction, the association analysis showed that two SNPs, 61102026 on  
10  
11 392 chromosome 1 and 23173971 on chromosome Z, had significant effects on plumage  
12  
13 393 color (adjusted  $P=0.028$  and  $P=0.019$ , respectively) (**Figure 5a**, **Figure S20** and  
14  
15  
16 394 **Table S21**). However, unlike the locus on chromosome 1, SNPs on chromosome Z  
17  
18  
19 395 near 23173971 showed a continuous peak on the Manhattan plot. In our previous  
20  
21  
22 396 analysis of plumage color heredity, we suggested that the locus on chromosome Z was  
23  
24  
25 397 most likely associated with plumage color. In a confirmation study, we added the 21  
26  
27  
28 398 previously re-sequenced quails with “maroon” plumage (including 10 wild quails and  
29  
30  
31 399 11 egg-type quails, **Table S11**) to rerun the association analysis for the two loci. The  
32  
33  
34 400 locus on chromosome Z was found to be more significantly associated with plumage  
35  
36  
37 401 color than before (adjusted  $P=0.015$ ). Conversely, there was no significant signal on  
38  
39  
40 402 chromosome 1 (adjusted  $P$ -value for SNP 61102026 fell to 1.000). Subsequently, the  
41  
42  
43 403 SNP 23173971 on chromosome Z, we found, was located closely to gene Coiled-coil  
44  
45  
46 404 domain-containing 171 (*CCDC171*) with a length of 135 kb. Therefore, we chose  
47  
48  
49 405 SNP 23173971 on chromosome Z as the index SNP within the region of 200 kb for  
50  
51  
52 406 conditional haplotype-based association testing. Consequently, 47 SNPs with  $r^2>0.7$   
53  
54  
55 407 and adjusted  $P>0.01$  were clumped together for association testing. Using 5,000  
56  
57  
58 408 permutations, a highly linked haplotype with a range of 182 kb could significantly  
59  
60  
61 409 explain the maroon/yellow variation ( $\chi^2=37.7$ ,  $P=8.563e-06$ ). The well-known *TYRPI*

1 410 gene that confers variable plumage color [53, 68] was located approximately 531 kb  
2  
3  
4 411 away from *CCDC171* (**Figure 2c**). The average of LD value between them was  
5  
6 412 estimated at less than 0.2. These observations suggested that the gene controlling  
7  
8  
9 413 plumage color in our population was different from *TYRP1*. We then chose eight  
10  
11  
12 414 SNPs significantly associated with plumage color, five of which are located within  
13  
14 415 *CCDC171*, and designed PCR primers to amplify these SNP markers to genotype an  
15  
16  
17 416 additional 100 “maroon” and 100 “yellow” quails. Interestingly, 99.75% of these  
18  
19  
20 417 SNPs were consistent between genotype and phenotype, suggesting that the  
21  
22  
23 418 *CCDC171* gene does control plumage color in quail (**Figure 5b**). We cloned the  
24  
25 419 *CCDC171* gene from yellow and maroon quail and found that this gene encoded  
26  
27  
28 420 different transcripts in quail depending on plumage color (**Figure 5c** and **Figure S21**).  
29  
30  
31 421 To examine the nature of the *CCDC171* genetic variants, we characterized the  
32  
33  
34 422 transcripts from the maroon and yellow alleles. The transcript from the yellow allele  
35  
36 423 was longer than the maroon transcript (about 232 bp) at the upstream region of the  
37  
38  
39 424 translation initiation site of maroon and has a deletion (147 bp) at position 787. In  
40  
41  
42 425 addition, we examined the differential expression of *CCDC171* in yellow and maroon  
43  
44  
45 426 quails and found there were no significant difference between the collected samples  
46  
47  
48 427 (*t*-test,  $P>0.05$ ).

49  
50  
51 428

## 52 53 54 429 **Discussion**

55  
56  
57 430 Birds represent the most widespread class of domesticated animals in the world  
58  
59  
60 431 and are the subjects of many evolutionary, biological and pathology studies that

1 432 illustrate the relationships among these avian species [30]. The timing of sexual  
2  
3 433 maturity is critical for both plants and animals. Quail have a unique maturation  
4  
5  
6 434 program compared with other birds and reach sexual maturity in a very short time. We  
7  
8  
9 435 detected four promising genes for this trait under positive selection in the *GnRH*  
10  
11  
12 436 signaling pathway in quail. Gonadotropins act on the testis and ovary to promote their  
13  
14  
15 437 development and the production of steroid hormones [69]. Further functional analysis  
16  
17  
18 438 of these genes should provide new insights into the genetic mechanisms that regulate  
19  
20 439 avian sexual maturity.  
21  
22

23 440 Analyzing the genes and mutations related to the development and evolution of  
24  
25  
26 441 agronomic traits in quail will also improve our understanding of the genetics of  
27  
28  
29 442 domestication. Genome-wide comparisons of domesticated (egg-type and meat-type  
30  
31  
32 443 lines) with wild quail identified several footprints of artificial selection. These  
33  
34  
35 444 selective sweep regions harbor candidate genes associated with important  
36  
37  
38 445 agro-economic traits. Genetic variations in these genes will be a rich resource for  
39  
40  
41 446 improving quail egg and meat production *via* genetic selection. It is worth noting that  
42  
43  
44 447 egg-type and meat-type quails did not share selective sweep regions when compared  
45  
46  
47 448 with wild quails (**Figure S11**), meaning that egg-type/meat-type quails might have  
48  
49  
50 449 been independently selected after domestication or that there were two separate  
51  
52  
53 450 domestication events in quails. Further studies are required to fully describe the  
54  
55  
56 451 domestication history of quails. Based on re-sequencing data, we have also identified  
57  
58  
59 452 a haplotype that is completely correlated with the control of “maroon/yellow”  
60  
61  
62 453 plumage color, a trait that has been used extensively in the breeding of domestic quail  
63  
64  
65

1 454 as a sex-linked marker.  
2  
3

4 455 Some recent studies [70] which use genomic data support our current  
5  
6 456 understanding of the phylogeny of the Perdicinae, Meleagridinae and Phasianinae  
7  
8  
9 457 families. However, without genome-wide data we have not been able to make strong  
10  
11  
12 458 conclusions. Here, we used whole-genome sequences of Japanese quail, turkey and  
13  
14  
15 459 chicken to represent each clade and resolve the phylogenetic relationships among the  
16  
17  
18 460 Perdicinae, Meleagridinae and Phasianinae families. Our study provided fully  
19  
20  
21 461 resolved branches with genome-scale data, supporting a split of the Perdicinae and  
22  
23 462 Phasianinae branches from the Meleagridinae branch about 69 MYA. Calibration  
24  
25  
26 463 based on fossils of early penguins, together with mitochondrial genome sequences of  
27  
28  
29 464 a modern albatross (*Diomedea melanophris*), petrel (*Pterodroma brevirostris*) and  
30  
31  
32 465 loon (*Gavia stellata*), allowed the divergence time of the Anseriformes and  
33  
34  
35 466 Galliformes to be estimated as  $77.1 \pm 2.5$  MYA [5]. Other recent avian genome data  
36  
37  
38 467 was used to estimate the divergence of Anseriformes and Galliformes at about 66  
39  
40  
41 468 MYA[71]. The resolution of their phylogeny will improve our understanding of the  
42  
43  
44 469 genetics of speciation of quail, chicken and turkey. In this research, we obtained a  
45  
46  
47 470 high quality draft of the Japanese quail genome and whole-genome resequencing data  
48  
49  
50  
51 471 of multiple quail sub-populations which will provide new opportunities to further  
52  
53  
54 472 understand quail biology and develop molecular markers for improving economically  
55  
56  
57 473 important agronomic traits.  
58  
59

60 474

## 61 475 **Conclusions**



1 476 In conclusion, we accomplished the genome assembly of quail with high-depth  
2  
3  
4 477 sequencing and carried out re-sequencing for 71 domestic and wild quail. We solved  
5  
6 478 the long-term arguments of phylogeny of quail, turkey and chicken and interpreted the  
7  
8  
9 479 biological mechanism of very early sexual maturity for quail. From the GWAS  
10  
11  
12 480 analysis, we detected a haplotype marker on chromosome Z which is important for  
13  
14  
15 481 quail breeding. These analyses should provide a valuable resource for the future  
16  
17  
18 482 studies for quail.

19  
20 483  
21  
22  
23  
24  
25  
26  
27  
28  
29  
30  
31  
32  
33  
34  
35  
36  
37  
38  
39  
40  
41  
42  
43  
44  
45  
46  
47  
48  
49  
50  
51  
52  
53  
54  
55  
56  
57  
58  
59  
60  
61  
62  
63  
64  
65

1 484 **Materials and Methods**

2  
3  
4 485 **Animal samples collection**

5  
6  
7 486 All 31 wild and domestic quails were collected from China. Of these, the 10 wild  
8  
9  
10 487 quails were sampled from the common habitats of wild quails in Henan province and  
11  
12 488 Shandong province, respectively. The other domestic quails were provided by local  
13  
14  
15 489 breeding companies (**Table S11**). The maroon or yellow plumage population were  
16  
17  
18 490 derived from two pure lines offered from Hubei Shendan Healthy Food Co., Ltd. In  
19  
20  
21 491 our previous investigation, we found that the F<sub>2</sub> population from a crossing of the  
22  
23 492 maroon plumage line and the yellow plumage line showed a 3:1 segregation ratio in  
24  
25  
26 493 plumage color. Thus, we randomly chose 20 yellows and 20 maroons from the pure  
27  
28  
29 494 lines for the association study (**Table S20**). All 71 quail samples were used for  
30  
31  
32 495 re-sequencing by BGI-Shenzhen. Additionally, the 100 maroon ones and the 100  
33  
34  
35 496 yellow ones were also derived from the two pure lines for validation of the plumage  
36  
37  
38 497 color gene.

39  
40  
41 498 **Genome sequencing and assembly**

42  
43  
44 499 A female quail collected from the maroon population was used for all genome  
45  
46  
47 500 sequencing. All experiments in this project were performed according to the principles  
48  
49  
50 501 of the animal ethics committee at BGI (China). DNA samples were isolated from  
51  
52  
53 502 blood following standard molecular biology techniques. A series of libraries of  
54  
55  
56 503 different insert sizes ranging from 170 bp to 40 kb (170 bp, 500 bp, 800 bp, 2 kb, 5 kb,  
57  
58  
59 504 10 kb, 20 kb and 40 kb) were constructed and used for a shotgun sequencing strategy.  
60  
61 505 The Illumina HiSeq 2000 system was used to generate paired-end reads. A total of

1 506 262Gb of raw data was obtained and reads were filtered based on the following  
2  
3 507 criteria. Reads with less than 10 percent unidentified (N) bases, with less than >40%  
4  
5  
6 508 low-quality bases, were contaminated by adaptors, or were duplicated during PCR  
7  
8  
9 509 were discarded; about 199Gb of clean data remained. The genome size (G) of quail  
10  
11 510 was first estimated at about 1.1Gb using the 17-mer depth frequency distribution  
12  
13 511 method:  $G = K\text{-mer\_num} / \text{Peak\_depth}$  (**Figure S1**). The genome was assembled using  
14  
15 512 SOAPdenovo2 v2.04.4 (SOAPdenovo2, RRID:SCR\_014986) [32]. Next, paired-end  
16  
17 513 reads were mapped back to the initial assembled genome to link contigs into long  
18  
19  
20  
21  
22 514 scaffolds. Benchmarking Universal Single-Copy Orthologs v2 (BUSCO,  
23  
24  
25 515 RRID:SCR\_015008) [72] was used to assess the assembly of genome with lineage  
26  
27  
28 516 dataset vertebrata\_odb9.

### 31 517 **Genome annotation**

32  
33  
34 518 RepeatMasker v4.0.5 (RepeatMasker, RRID:SCR\_012954) [73] and  
35  
36  
37 519 Repeat-ProteinMask v4.0.5 were used to search for TEs (transposable elements)  
38  
39  
40 520 against the RepBase library v20.04 [74] to detect known repeats. A custom TE library  
41  
42  
43 521 was then constructed using RepeatModeller v1.0.8 and LTR\_FINDER v1.0.6[75] for  
44  
45 522 *de novo* detection of repeats. Tandem Repeat Finder v4.0.7 [76] was also used to  
46  
47  
48 523 predict tandem repeats. Final results of TE detection were integrated using in-house  
49  
50  
51 524 scripts.

52  
53  
54 525 Homology-based and *ab initio* gene prediction methods, assisted by  
55  
56  
57 526 transcriptome sequencing, were used to analyze coding DNA sequences and to model  
58  
59  
60 527 genes. Initially, protein data for *Homo sapiens* (human), *Meleagris gallopavo* (turkey),

1 528 *Gallus gallus* (chicken), *Taeniopygia guttata* (zebra finch) and *Anas platyrhynchos*  
2  
3 529 (duck) were downloaded from the Ensembl v80 database [77] and aligned to the  
4  
5  
6 530 predicted proteins encoded by the quail genome using BLAT (BLAT,  
7  
8  
9 531 RRID:SCR\_011919) [78]. GeneWise v2.2.0 (GeneWise, RRID:SCR\_015054) [79]  
10  
11 532 was then used to further improve the accuracy of alignments and predict gene  
12  
13 533 structures. AUGUSTUS v3.1 (Augustus: Gene Prediction, RRID:SCR\_008417) [80]  
14  
15 534 and GENSCAN v1.0 (GENSCAN, RRID:SCR\_012902) [81] were then used for *ab*  
16  
17 535 *initio* gene prediction. Transcriptome reads were mapped to the genome with TopHat  
18  
19  
20 536 v1.2 (TopHat, RRID:SCR\_013035) [82] and Cufflinks v2.2.1 (Cufflinks,  
21  
22  
23 537 RRID:SCR\_014597) [83] was used to confirm gene structures. Subsequently, we  
24  
25  
26 538 combined the homology-based and *de novo* predicted gene sets using GLEAN [84]  
27  
28  
29 539 and integrated the GLEAN and transcriptome results with in-house scripts to generate  
30  
31  
32 540 a representative and non-redundant gene set.  
33  
34  
35

### 36 541 **Gene evolutionary analysis**

37  
38  
39  
40 542 Gene families in quail, *Gallus gallus* (chicken, Ensembl v80), *Anas*  
41  
42 543 *platyrhynchos* (duck, Ensembl v80), *Columba livia* (pigeon, [85]), *Falco cherrug*  
43  
44 544 (Saker falcon, [86]), *Falco peregrinus* (Peregrine falcon, [87]), *Ficedula albicollis*  
45  
46 545 (collared flycatcher, Ensembl v80), *Geospiza fortis* (medium ground finch, [88]),  
47  
48  
49 546 *Meleagris gallopavo* (turkey, Ensembl v80), *Pseudopodoces humilis* (ground tit, [89]),  
50  
51  
52 547 *Taeniopygia guttata* (zebra finch, Ensembl v80) and *Alligator sinensis* (Chinese  
53  
54 548 alligator , ASM45574v1), as an outgroup, were defined using TreeFam  
55  
56  
57 549 (<http://www.treefam.org/>). Phylogenetic trees were then constructed using MrBayes  
58  
59  
60  
61  
62  
63  
64  
65

1 550 (MrBayes, RRID:SCR\_012067) [90] and PhyML (PhyML, RRID:SCR\_014629) [91]  
2  
3 551 with fourfold degenerate (4D) sites of 4,393 single-copy orthologs shared among the  
4  
5  
6 552 12 species analyzed here. Divergence times were estimated using MCMCTree  
7  
8  
9 553 (<http://abacus.gene.ucl.ac.uk/software/paml.html>) from the PAML (PAML,  
10  
11  
12 554 RRID:SCR\_014932) package [92] together with three fossil dates from the TimeTree  
13  
14 555 database [93] (<http://www.timetree.org/>) for calibration. Analyses of the expansion  
15  
16  
17 556 and contraction of gene families were carried out using CAFE (Computational  
18  
19  
20 557 Analysis of Gene Family Evolution) [94] using a random birth and death model with a  
21  
22  
23 558 global parameter,  $\lambda$ , which represents the probability of both gain and loss of a gene  
24  
25  
26 559 over a given time interval. Conditional  $p$ -values were calculated and defined as  
27  
28  
29 560 significant at values of less than 0.05. To detect PSGs, the coding sequences of all the  
30  
31  
32 561 single-copy orthologous genes were aligned using PRANK [95] and poorly aligned  
33  
34  
35 562 sites were removed using gBlocks [96]. High-quality alignments were then filtered to  
36  
37  
38 563 estimate the ratios ( $\omega=d_N/d_S$ ) of nonsynonymous nucleotide substitutions ( $d_N$ ) to  
39  
40  
41 564 synonymous nucleotide substitutions ( $d_S$ ) for these genes in the target quail branch  
42  
43  
44 565 ( $\omega_0$ ), other branches ( $\omega_1$ ) or all branches ( $\omega_2$ ) using the codeml program with an  
45  
46  
47 566 improved branch-site model (TEST-II) [97] (model = 2, NSsites = 2) and the  
48  
49  
50 567 maximum likelihood method in the PAML package [92]. TEST-II is a likelihood ratio  
51  
52  
53 568 test that compares a null hypothesis with fixed  $\omega=1$  with model A that allows  $\omega_2>1$  in  
54  
55  
56 569 the foreground lineages. TEST-II can discriminate relaxed selective constraints  
57  
58  
59 570 analysis from positive selection and is a direct test for positive selection on the  
60  
61  
62 571 foreground lineages [98]. Positively selected sites were detected by using Bayes

1 572 Empirical Bayes (BEB) method [99] which can avoid an excessive false positive rate  
2  
3 573 [100].  
4  
5

#### 6 574 **Resequencing and SNP calling**

7  
8  
9 575 A total of 71 individuals were chosen for resequencing (see more information  
10  
11 regarding samples). Genomic DNAs were isolated and then used to construct Illumina  
12 576  
13 libraries with an insert size of 500bp. The Illumina HiSeq 2000 platform was used to  
14 577  
15 generate paired-end reads and raw data was filtered by removing reads containing  
16 578  
17 greater than 50% low-quality bases (Q value  $\leq 5$ ), reads containing more than 5%  
18 579  
19 unidentified (N) bases and those with adapter contamination. The clean reads were  
20 580  
21 mapped to the assembled reference genome using BWA software v0.7.12 (BWA,  
22 581  
23 RRID:SCR\_010910) [101] with parameters “-m 200000 -o 1 -e 30 -i 15 -L -I -t 4 -n  
24 582  
25 0.04 -R 20”, and the results were transformed into indexed BAM files using  
26 583  
27 SAMtools v0.1.18 [102]. The picard package v1.105 and Genome Analysis Toolkit v  
28 584  
29 3.3-0 (GATK , RRID:SCR\_001876,) [103] were then used for SNP calling. To obtain  
30 585  
31 high-quality SNPs, we: 1) deleted duplicate reads; 2) improved alignments using the  
32 586  
33 IndelRealigner package in GATK; 3) recalibrated base quality scores using the  
34 587  
35 BaseRecalibrator package in GATK; 4) called SNPs using the UnifiedGenotyper  
36 588  
37 package in GATK with a minimum phred-scaled confidence value of 50 and a  
38 589  
39 minimum phred-scaled confidence threshold of 10 for calling variants; 5) assessed  
40 590  
41 variant quality using the VariantRecalibrator and ApplyRecalibration packages with  
42 591  
43 truth sensitivity filter level of 99 in GATK; and 6) filtered SNPs using the  
44 592  
45 VariantFiltration package in GATK with parameters “--filterExpression "QD < 2.0 ||  
46 593  
47  
48  
49  
50  
51  
52  
53  
54  
55  
56  
57  
58  
59  
60  
61  
62  
63  
64  
65

1 594 MQ < 40.0 || ReadPosRankSum< -8.0 || FS > 60.0 || HaplotypeScore> 13.0 ||  
2  
3 595 MQRankSum< -12.5" -filterNameLowQualFilter -  
4  
5  
6 596 missingValuesInExpressionsShouldEvaluateAsFailing".  
7  
8

### 9 597 **SNP quality control (QC)**

10  
11  
12 598 The chromosomal variant call format (VCF) files were transformed into PLINK  
13  
14  
15 599 format by using VCFtools v0.1.13 (<https://vcftools.github.io/index.html>) and  
16  
17  
18 600 subsequent analyses were performed by using PLINK v1.07 (PLINK,  
19  
20  
21 601 RRID:SCR\_001757) [104]. As the default chromosome handling type in PLINK is for  
22  
23  
24 602 human (1:22, X, Y), the PLINK files for male quail (ZZ) and the female quail (WZ)  
25  
26  
27 603 were swapped with each other before data were analyzed because the heterogametic  
28  
29  
30 604 gender in quail is female. Additionally, the command --dog (39n) was added at the  
31  
32  
33 605 beginning of each command line to ensure that all quail chromosomes would be  
34  
35  
36 606 included.

37  
38 607 Individual quality control consisted of the following three steps: 1) determining  
39  
40  
41 608 the sex of individuals, 2) detecting individuals with missing genotypes and 3)  
42  
43  
44 609 identifying duplicate or highly related individuals. Any discordant sex information  
45  
46  
47 610 was checked in terms of the heterozygosity rates on the Z chromosome as described  
48  
49  
50 611 by the *F* statistic, that is, any individual quail for which the *F*-value was less than 0.8  
51  
52  
53 612 in a male quail (ZZ) or greater than 0.2 in a female quail (ZW) would be removed  
54  
55  
56 613 from the sample set. The missing genotype rate for each individual was set to less  
57  
58  
59 614 than 10% to filter out individuals with unreliable genotype information. Case-control  
60  
61  
62 615 association studies assume that all individuals in a population are unrelated. We used

1 616 a complete linkage agglomerative clustering method that was based on pairwise  
2  
3 617 identity-by-state (IBS) to identify the genomic similarity of pairs of individuals. Any  
4  
5  
6 618 individual with an IBS greater than 0.9 would be filtered out of the sample set.  
7  
8

9 619 SNP quality control consisted of the following four steps: 1) estimating the  
10  
11 620 missing genotype rate (MGR) for each SNP, 2) determining whether there was a  
12  
13 621 significant difference in the rate of missing SNP genotypes between the case and  
14  
15 622 control groups, 3) filtering out SNPs with very low minor allele frequencies (MAF),  
16  
17 623 and 4) filtering out SNPs with frequencies that deviate significantly from  
18  
19 624 Hardy-Weinberg Equilibrium (HWE). Filtering out the low-quality SNPs helped not  
20  
21 625 only to avoid false-positives, but also to enhance our ability to identify the loci  
22  
23 626 significantly associated with traits. Therefore, the criteria for filtering were  
24  
25 627 MGR>0.05, a significant difference in MGR between case and control according to  
26  
27 628 *t*-test, at  $P<0.05$ , MAF<0.05 and a  $P$ -value for deviation from HWE<0.0001.  
28  
29  
30  
31  
32  
33  
34  
35  
36

37 629 Extensive genome-wide regions of high linkage disequilibrium (LD) in quail  
38  
39 630 strongly influenced the results of population structure, principal component and  
40  
41 631 association analyses. Thus, we pruned out the pairwise SNPs with  $r^2$  values of greater  
42  
43 632 than 0.2 in each 50 bp sliding window, and set 10 bp steps for sliding window analysis  
44  
45 633 to ensure 80% overlaps between any two adjacent windows.  
46  
47  
48  
49  
50

### 51 634 **Population structure analysis**

52  
53

54 635 The phylogenetic tree was constructed using the neighbor-joining method in  
55  
56 636 MEGA v6.0 (MEGA Software, RRID:SCR\_000667) [105] based on a pairwise  
57  
58 637 distance matrix which was estimated using IBS distances in PLINK v1.07. Analysis of  
59  
60  
61  
62  
63  
64  
65



1 638 population stratification was conducted by performing complete linkage clustering of  
2  
3 639 individuals using autosomal genome-wide SNP data in PLINK. Principle component  
4  
5  
6 640 analysis (PCA) was carried out using the smartpca script  
7  
8  
9 641 (<https://github.com/argriffing/eigensoft/blob/master/bin/smartpca.perl>) and the scatter  
10  
11 642 plots were drawn by using R v3.2.2 (<https://www.r-project.org/>). We used  
12  
13 643 ADMIXTURE v1.3 [43] to analyze population structure, which uses the likelihood  
14  
15 644 model-based manner from large autosomal SNP genotype datasets. The number of  
16  
17 645 populations ( $K$ ) was set from  $K = 2$  to 5 to obtain the maximum likelihood estimates  
18  
19  
20 646 that would allow us to infer population structure. The cross-validation procedure was  
21  
22 647 performed to exhibit a low cross-validation error, which made it fairly clear that what  
23  
24 648 the optimal  $K$  value was. The parameter standard errors were estimated by using 100  
25  
26 649 bootstrap replicates. The cross-validation plot was drawn by using R v3.3.2. The  
27  
28 650 average LD of a pair of SNPs in a 300 kb sliding window was estimated by using  
29  
30 651 PopLDdecay v2.69 (<https://github.com/BGI-shenzhen/PopLDdecay>), and the LD  
31  
32 652 decay curves for the three populations were drawn by using R v3.3.2.  
33  
34  
35  
36  
37  
38  
39  
40  
41  
42

### 653 **Calculation of nucleotide diversity and estimation of population differentiation** 654 **using $F_{ST}$**

43  
44  
45  
46  
47  
48 655 Watterson's estimator  $\theta_w$  [38] and the average number of pairwise differences per  
49  
50 656 sequence estimator  $\pi$  [39] were calculated using in-house Perl scripts. Tajima's  $D$  [39]  
51  
52 657 was estimated using  $\theta_w$ ,  $\pi$  and the number of sequences. We scanned the whole  
53  
54 658 genome to calculate the three estimators by using the 90% overlapped sliding window  
55  
56  
57 659 with size of 100 kb or 50 kb. The fixation index ( $F_{ST}$ ), a measure of population  
58  
59  
60  
61  
62  
63  
64  
65

1 660 differentiation due to genetic structure [106], was estimated by using VCFtools  
2  
3 661 v0.1.13 also with 50 kb and 100 kb 90% overlapped sliding windows on a  
4  
5  
6 662 genome-wide scale.  
7  
8

### 9 663 **Association analysis and conditional haplotype-based association testing**

10  
11  
12 664 The post-QC data was saved as PED format and later was used for GWAS via  
13  
14  
15 665 GEMMA v0.94. The centered relatedness matrix was calculated with the parameter  
16  
17  
18 666 “-gk 1”. The relatedness matrix was considered as a covariance using a linear mixed  
19  
20  
21 667 model to perform the Wald test, likelihood ratio test and score test. The GWAS results  
22  
23  
24 668 were shown as a Manhattan plot and Q-Q plot and were drawn by using the *qqman*  
25  
26  
27 669 package in R v3.2.2. The SNP with the most significant effect on phenotypic variation  
28  
29  
30 670 was regarded as the index SNP and the flanking 100 kb region of the index SNP was  
31  
32  
33 671 scanned for haplotype construction. In this region, the SNPs with high LD ( $r^2>0.7$ )  
34  
35  
36 672 and significant association to plumage color (adjusted  $P<0.01$ ) were grouped into a  
37  
38  
39 673 clump. Then, the SNPs gathered in a clump were extracted by using PLINK v1.07 and  
40  
41  
42 674 transformed into Haploview format for conditional haplotype association testing. The  
43  
44  
45 675 haplotypes in block were estimated with permutation of 5,000, and the LD plot  
46  
47  
48 676 between gene *CDCC171* and *TYRPI* was drawn using Haplotype v4.2 [107].  
49

### 50 677 **Molecular experiments**

#### 51 678 **(a) Follicle-Stimulation Hormone (FSH) testing by ELISA**

52  
53  
54  
55 679 We selected 100 male quails, 100 female quails, 100 hens and 100 cocks from  
56  
57  
58 680 Hubei in China and they were raised under the same conditions. In four populations,  
59  
60

1 681 blood samples from 10 individuals were collected every week (0-6 weeks). The sera  
2  
3  
4 682 were separated from the blood and stored in -20°C for testing. The *FSH* hormone of  
5  
6 683 quails and chicken were tested using the Follicle-Stimulation Hormone (FSH) ELISA  
7  
8  
9 684 Kit (Abcam, UK) according to the manufacturer's instructions.

10  
11  
12 685 **(b) *CCDC171* transcripts cloning and expression**

13  
14  
15 686 We designed three and four pairs of primers (**Table S22**) to clone transcripts of  
16  
17  
18 687 *CCDC171* in yellow and maroon quails respectively. For determining the differential  
19  
20  
21 688 expression of *CCDC171* in yellow and maroon quail, we collected hair follicles, back  
22  
23  
24 689 skin and abdomen skin from three "yellow" quails and three "maroon" quails. Two  
25  
26  
27 690 pairs of primers were designed to detect the differential expression of *CCDC171* by  
28  
29 691 qPCR.

30  
31  
32 692 **(c) Validation of SNPs**

33  
34  
35 693 DNA from the different plumage quails was extracted from blood samples  
36  
37  
38 694 following standard molecular biology techniques and stored in -80°C, and used  
39  
40  
41 695 software Primer 6.0 for designing primers to validate the eight SNPs which were  
42  
43  
44 696 significantly associated with plumage color. The PCR products were sequenced on the  
45  
46  
47 697 Sanger sequencing platform.

48  
49 698  
50  
51 699 **Additional files**

52  
53  
54 700 **Additional file 1: Figures S1-21, Tables S1-12, Table S18, Tables S20-22.**

55  
56  
57 701 **Additional file 2: Table S13.** Diversity statistics of 31 quails.

58  
59 702 **Additional file 3: Table S14.** The large scale of genomic regions showing reduction  
60  
61

1 703 of diversity (ROD) between egg-type quail and wild quail at 100 kb overlapping  
2  
3 704 sliding window in 10 kb step.  
4

5  
6 705 **Additional file 4: Table S15.** Functional enrichment for selective sweep regions  
7  
8 706 between egg-type and wild quails.  
9

10  
11 707 **Additional file 5: Table S16.** The large scale of genomic regions showing reduction  
12  
13 708 of diversity (ROD) between meat-type quail and wild quail at 100 kb overlapping  
14  
15 709 sliding window in 10 kb step.  
16  
17

18  
19  
20 710 **Additional file 6: Table S17.** Functional enrichment for selective sweep regions  
21  
22 711 between meat-type and wild quails.  
23

24  
25 712 **Additional file 7: Table S19.** Copy numbers of innate immune response-related genes  
26  
27 713 among quail, chicken, turkey and duck.  
28  
29

#### 30 714 **Data availability**

31  
32  
33 715 Resequencing and transcriptomic raw data are available from NCBI SRP104331.  
34  
35 716 Data supporting the manuscript, including sequence assembly files, annotations and  
36  
37 717 BUSCO results, are also available via the GigaScience database, GigaDB [108].  
38  
39

#### 40 718 **Acknowledgements**

41  
42  
43 719 We would like to thank Dr. Leif Andersson, Dr. Sangeet Lamichhaney, Dr.  
44  
45 720 Susanne Bornelöv and Prof. Maxwell Hinckegave for their insightful comments on  
46  
47 721 this manuscript. We also thank Dr. Lynn Fink for revising the manuscript. This project  
48  
49 722 was supported by the Agricultural Science and Technology Innovation Center of  
50  
51 723 Hubei (2012tsxk09 and 2014jzxjh02) and the Key Laboratory of Animal Embryo and  
52  
53 724 Molecular Breeding of Hubei (2014-2017 ZD146).  
54  
55  
56  
57  
58  
59  
60  
61  
62  
63  
64  
65

1 725 **Authors' contributions**

2  
3 726 Y.W. was responsible for collecting samples for sequencing, carrying out  
4  
5  
6 727 experimental verification and co-drafting the manuscript. Y.Z. made contributions to  
7  
8  
9 728 genome annotation, phylogenetic analysis, immune-related gene analysis, detecting  
10  
11  
12 729 genes under positive selection, SNP calling in re-sequencing data and co-drafting of  
13  
14  
15 730 the manuscript. Z.H. and J.P. designed the scientific objectives and co-drafted  
16  
17  
18 731 manuscript. S.S. and J.C. carried out SNP quality control, GWAS analysis, detecting  
19  
20  
21 732 selective sweep regions and co-drafting of the manuscript. G.F. participated in  
22  
23  
24 733 genome assembly, analyzing inversions and co-drafting of the manuscript. W.C., X.C.,  
25  
26  
27 734 J.J., X.F. and X.X. participated in project management and manuscript revision. H.L.,  
28  
29  
30 735 J.S., A.P., Y.P., Z.L., H.Z., J.S., C.Z., H.T., H.X. and C.L. worked on sample  
31  
32  
33 736 preparation and experimental verification. X.D., G.H., P.Y., H.Z., T.Y., B.W., H.Y. and  
34  
35  
36 737 M.B. took part in data processing. D.B. and W.W. provided suggestions and revised  
37  
38  
39 738 the manuscript. N.Y., X.L. and J.D. designed this project, provided suggestions and  
40  
41  
42 739 revised the manuscript.

43 740 **Competing interests**

44 741 The authors declare that they have no competing interests.

45 742 **Author details**

46 743 <sup>1</sup>Institute of Animal Husbandry and Veterinary, Hubei Academy of Agricultural  
47  
48 744 Science, Wuhan 430064, China

49  
50  
51 745 <sup>2</sup>BGI-Shenzhen, Shenzhen 518083, China

52  
53  
54 746 <sup>3</sup>Hubei Key Laboratory of Animal Embryo and Molecular Breeding, Wuhan 430064,  
55  
56  
57  
58  
59 747 China

1 748 <sup>4</sup>National Engineering Laboratory for Animal Breeding and MOA Key Laboratory of  
2  
3 749 Animal Genetics and Breeding, China Agricultural University, Beijing 100193, China  
4  
5  
6 750 <sup>5</sup>BGI-Qingdao, Qingdao, Shandong Province, 266555, China.  
7  
8  
9 751 <sup>6</sup>Hubei Innovation Center of Agricultural Science and Technology, Wuhan, Hubei,  
10  
11 752 430064, China  
12  
13  
14 753 <sup>7</sup>Hubei Shendan Healthy Food Co., Ltd., Wuhan 430206, China  
15  
16  
17 754 <sup>8</sup>State Key Laboratory of Quality Research in Chinese Medicine and Institute of  
18  
19 755 Chinese Medical Sciences, Macao, China  
20  
21  
22 756 <sup>9</sup>The Roslin Institute and Royal (Dick) School of Veterinary Studies, University of  
23  
24 757 Edinburgh, Midlothian EH25 9RG, UK  
25  
26  
27 758 <sup>10</sup>Kunming Institute of Zoology, Chinese Academy of Sciences (CAS), Kunming,  
28  
29 759 China  
30  
31  
32 760 <sup>11</sup>China National GeneBank-Shenzhen, BGI-Shenzhen, Shenzhen 518083, China  
33  
34  
35 761 <sup>12</sup>James D. Watson Institute of Genome Sciences, Hangzhou 310058, China  
36  
37  
38 762 \*These authors contributed equally to this work.  
39  
40  
41 763 †Correspondence should be addressed to Jinping Du ([ddjinpin@163.com](mailto:ddjinpin@163.com)) or Xin Liu  
42  
43 764 ([liuxin@genomics.cn](mailto:liuxin@genomics.cn))  
44  
45 765

1 766 **Figure legends**

2 767 **Figure 1. Chromosomes of quail.** (a) Gene and TE density of each quail  
3 chromosome. (b) Comparison of the chromosome lengths of quail and chicken.  
4  
5

6 769  
7  
8 770 **Figure 2. Comparative evolutionary analysis of 12 avian species.** (a) The  
9 phylogenetic tree of *Coturnix japonica* (quail), *Gallus gallus* (chicken), *Anas*  
10 *platyrhynchos* (duck), *Columba livia*(pigeon), *Falco cherrug* (Saker falcon), *Falco*  
11 *peregrinus* (Peregrine falcon), *Ficedula albicollis* (collared flycatcher), *Geospiza*  
12 *fortis* (medium ground finch), *Meleagris gallopavo* (turkey), *Pseudopodoces*  
13 *humilis*(ground tit), *Taeniopygia guttata* (zebra finch), with *Alligator sinensis*  
14 (Chinese alligator) as an outgroup. (b) Syntenic relationships between the quail and  
15 chicken genomes. (c) An inversion detected in chromosome Z between quail and  
16 chicken.  
17  
18  
19  
20  
21  
22  
23  
24  
25  
26  
27  
28

29 780 **Figure 3. Analyses of the phylogenetic relationships, population structure, LD**  
30 **decay and genetic diversity between wild and domesticated quail.** (a)  
31 Evolutionary history was inferred using the neighbor-joining method in MEGA 6.0.  
32 (b) Principle component analysis of wild quail and domesticated quail. (c) LD decay  
33 curves were estimated by squared pairwise correlations of alleles against physical  
34 distance in wild quail, egg-type quail and meat-type quail, respectively. (d) Population  
35 structure analysis with the maximum likelihood score for the model  $K = 2$ . (e)  
36 Nucleotide diversity between wild quail and egg-type quail across chromosome Z.  
37 Both the wild quail (red line) and the egg-type quail (green line) showed of the  
38 difference of diversity on chromosome Z. Plotting of Tajima's  $D$  for the egg-type  
39 group (blue line) in a 100 kb sliding window in 10 kb steps revealed the selective  
40 signal on chromosome Z. Likewise, plotting Weir's  $F_{st}$  (black line) on chromosome Z  
41 indicates the level of differentiation between the wild group and the egg-type group.  
42 Both of gene *CCDC171* and *TYRP1* were located within a selective sweep region  
43 (from ~21.5 Mb to 23.2 Mb), in which the positive signal was detected in the egg-type  
44 group. However, they exhibited a weak linkage due to the location on the different  
45  
46  
47  
48  
49  
50  
51  
52  
53  
54  
55  
56  
57  
58  
59  
60  
61  
62  
63  
64  
65

1 796 haplotype blocks.

2 797

3  
4 **798 Figure 4. Genes related to early sexual maturity and immune system function in**

5  
6 **799 quail and another avian species. (a)** Positions of amino acids under positive

7  
8 **800 selection in the follicle stimulating hormone beta (FSH $\beta$ ) protein. (b)** Location of two

9  
10 **801 amino acids under positive selection on the predicted 3D structure of the FSH $\beta$**

11  
12 **802 protein. (c)** Circulating FSH $\beta$  levels in blood during early development stages of quail

13  
14 **803 and chicken for 6 weeks. (d)** Phylogenetic tree of Immunoglobulin-like and

15  
16 **804 Immunoglobulin subtype proteins of quail, chicken, duck, turkey and zebra finch.**

17  
18  
19 805

20  
21 **806 Figure 5. GWAS analysis of quail plumage color. (a)** Manhattan plot of each

22  
23 **807 chromosome showing the GWAS results for quail plumage color. (b)** Validation of

24  
25 **808 eight candidate SNPs in 200 random individual quail. (c)** The clones of *CCDC171*

26  
27 **809 gene transcripts from quail with “yellow” and “maroon” plumage.**

28  
29  
30 810

## 31 **Tables**

32  
33 **812 Table 1 Statistics of SNPs in whole genome and genic regions of wild and domesticated quail**

34  
35 813

36  
37 814

38  
39 815

40

41

42

43

44

45

46

47

48

49

50

51

52

53

54

55

56

57

58

59

60

61

62

63

64

65



816

1  
2 **817 References**

- 3  
4 818 1. Dalloul RA, Long JA, Zimin AV, Aslam L, Beal K, Blomberg LA, et al. Multi-platform  
5 819 next-generation sequencing of the domestic turkey (*Meleagris gallopavo*): genome assembly and  
6 820 analysis. *PLoS Biol.* 2010;8 9:e1000475.  
7 821 2. Wallis JW, Aerts J, Groenen MA, Crooijmans RP, Layman D, Graves TA, et al. A physical map of  
8 822 the chicken genome. *Nature.* 2004;432 7018:761-4.  
9 823 3. Kawahara-Miki R, Sano S, Nunome M, Shimmura T, Kuwayama T, Takahashi S, et al.  
10 824 Next-generation sequencing reveals genomic features in the Japanese quail. *Genomics.* 2013;101  
11 825 6:345-53.  
12 826 4. Jetz W, Thomas G, Joy J, Hartmann K and Mooers A. The global diversity of birds in space and  
13 827 time. *Nature.* 2012;491 7424:444-8.  
14 828 5. Slack KE, Jones CM, Ando T, Harrison GA, Fordyce RE, Arnason U, et al. Early penguin fossils,  
15 829 plus mitochondrial genomes, calibrate avian evolution. *Mol Biol Evol.* 2006;23 6:1144-55.  
16 830 6. van Tuinen M and Dyke GJ. Calibration of galliform molecular clocks using multiple fossils and  
17 831 genetic partitions. *Mol Phylogenet Evol.* 2004;30 1:74-86.  
18 832 7. van Tuinen M and Hedges SB. Calibration of avian molecular clocks. *Mol Biol Evol.* 2001;18  
19 833 2:206-13.  
20 834 8. Kayang BB, Fillon V, Inoue-Murayama M, Miwa M, Leroux S, Fève K, et al. Integrated maps in  
21 835 quail (*Coturnix japonica*) confirm the high degree of synteny conservation with chicken (*Gallus*  
22 836 *gallus*) despite 35 million years of divergence. *BMC Genomics.* 2006;7 1:1.  
23 837 9. Shibusawa M, Minai S, Nishida-Umehara C, Suzuki T, Mano T, Yamada K, et al. A comparative  
24 838 cytogenetic study of chromosome homology between chicken and Japanese quail. *Cytogenet*  
25 839 *Genome Res.* 2002;95 1-2:103-9.  
26 840 10. Hazard D, Couty M, Faure J and Guémené D. Relationship between hypothalamic-pituitary-adrenal  
27 841 axis responsiveness and age, sexual maturity status, and sex in Japanese quail selected for long or  
28 842 short duration of tonic immobility. *Poult Sci.* 2005;84 12:1913-9.  
29 843 11. Siopes T. Initiation of egg production by turkey breeder hens: Sexual maturation and age at lighting.  
30 844 *Poult Sci.* 2010;89 7:1490-6.  
31 845 12. Caetano-Anolles K, Seo M, Rodriguez-Zas S, Oh J-D, Han JY, Lee K, et al. Comprehensive  
32 846 Identification of Sexual Dimorphism-Associated Differentially Expressed Genes in Two-Way  
33 847 Factorial Designed RNA-Seq Data on Japanese Quail (*Coturnix coturnix japonica*). *PLoS ONE.*  
34 848 2015;10 9:e0139324.  
35 849 13. Ricklefs R. Patterns of growth in birds. II. Growth rate and mode of development. *Ibis.* 1973;115  
36 850 2:177-201.  
37 851 14. Moudgal R. Female quails are heavier than male: Cause of uniqueness. *Indian Journal of Poultry*  
38 852 *Science.* 1997;32 1:81-3.  
39 853 15. Satterlee D, Parker L, Castille S, Cadd G and Jones R. Struggling behavior in shackled male and  
40 854 female broiler chickens. *Poultry science.* 2000;79 5:652-5.  
41 855 16. Chang G, Chang H, Zhenl H, Liu X, Sun W, Geng R, et al. Study on Phylogenetic Relationship  
42 856 Between Wild Japanese Quails in the Weis1a| 1 Lake Area and Domestic Quails. 2001.  
43 857 17. Cécilia H, Catherine Gh, Sophie L and Jean-Pierre R. Daily organization of laying in Japanese and  
44 858 European quail: Effect of domestication. *Journal of Experimental Zoology Part A: Comparative*  
45 859 *Experimental Biology.* 2004;301 2:186-94.

- 1 860 18. Mills AD, Crawford LL, Domjan M and Faure JM. The behavior of the Japanese or domestic quail  
2 861 *Coturnix japonica*. *Neurosci Biobehav Rev.* 1997;21 3:261-81.
- 3 862 19. Andersson MB. Sexual selection. Princeton University Press; 1994.
- 4 863 20. Hill G and McGraw K. Bird coloration. Function and evolution, vol. 2. Cambridge, MA: Harvard  
5 864 University Press, 2006.
- 6 865 21. Theron E, Hawkins K, Bermingham E, Ricklefs RE and Mundy NI. The molecular basis of an avian  
7 866 plumage polymorphism in the wild: a melanocortin-1-receptor point mutation is perfectly  
8 867 associated with the melanic plumage morph of the bananaquit, *Coereba flaveola*. *Curr Biol.* 2001;11  
9 868 8:550-7.
- 10 869 22. Mundy NI, Badcock NS, Hart T, Scribner K, Janssen K and Nadeau NJ. Conserved genetic basis of  
11 870 a quantitative plumage trait involved in mate choice. *Science.* 2004;303 5665:1870-3.
- 12 871 23. Nadeau NJ, Burke T and Mundy NI. Evolution of an avian pigmentation gene correlates with a  
13 872 measure of sexual selection. *Proc R Soc Lond B Biol Sci.* 2007;274 1620:1807-13.
- 14 873 24. Ottinger MA, Abdelnabi M, Li Q, Chen K, Thompson N, Harada N, et al. The Japanese quail: a  
15 874 model for studying reproductive aging of hypothalamic systems. *Exp Gerontol.* 2004;39  
16 875 11:1679-93.
- 17 876 25. Yasuo S, Ebihara S and Yoshimura T. Circadian expression of clock gene in the optic tectum of  
18 877 Japanese quail. *Brain Res.* 2004;1005 1:193-6.
- 19 878 26. Creuzet S, Schuler B, Couly G and Le Douarin NM. Reciprocal relationships between *Fgf8* and  
20 879 neural crest cells in facial and forebrain development. *Proc Natl Acad Sci U S A.* 2004;101  
21 880 14:4843-7.
- 22 881 27. Nain S, Bour A, Chalmers C and Smits J. Immunotoxicity and disease resistance in Japanese quail  
23 882 (*Coturnix coturnix japonica*) exposed to malathion. *Ecotoxicology.* 2011;20 4:892-900.
- 24 883 28. Kimball RT and Braun EL. Does more sequence data improve estimates of galliform phylogeny?  
25 884 Analyses of a rapid radiation using a complete data matrix. *PeerJ.* 2014;2:e361.
- 26 885 29. Pereira SL and Baker AJ. A molecular timescale for galliform birds accounting for uncertainty in  
27 886 time estimates and heterogeneity of rates of DNA substitutions across lineages and sites. *Mol*  
28 887 *Phylogenet Evol.* 2006;38 2:499-509.
- 29 888 30. Kaiser VB, van Tuinen M and Ellegren H. Insertion events of CR1 retrotransposable elements  
30 889 elucidate the phylogenetic branching order in galliform birds. *Mol Biol Evol.* 2007;24 1:338-47.
- 31 890 31. Guan X, Silva P, Gyenai KB, Xu J, Geng T, Tu Z, et al. The mitochondrial genome sequence and  
32 891 molecular phylogeny of the turkey, *Meleagris gallopavo*. *Anim Genet.* 2009;40 2:134-41.
- 33 892 32. Luo R, Liu B, Xie Y, Li Z, Huang W, Yuan J, et al. SOAPdenovo2: an empirically improved  
34 893 memory-efficient short-read de novo assembler. *GigaScience.* 2012;1 1:1.
- 35 894 33. Recoquillay J, Pitel F, Arnould C, Leroux S, Dehais P, Moréno C, et al. A medium density genetic  
36 895 map and QTL for behavioral and production traits in Japanese quail. *BMC Genomics.* 2015;16 1:1.
- 37 896 34. Zhang G, Li C, Li Q, Li B, Larkin DM, Lee C, et al. Comparative genomics reveals insights into  
38 897 avian genome evolution and adaptation. *Science.* 2014;346 6215:1311-20.
- 39 898 35. Nadeau N, Mundy N, Gourichon D and Minvielle F. Association of a single-nucleotide substitution  
40 899 in *TYRP1* with roux in Japanese quail (*Coturnix japonica*). *Anim Genet.* 2007;38 6:609-13.
- 41 900 36. Aslam ML, Bastiaansen JW, Elferink MG, Megens H-J, Crooijmans RP, Blomberg LA, et al. Whole  
42 901 genome SNP discovery and analysis of genetic diversity in Turkey (*Meleagris gallopavo*). *BMC*  
43 902 *genomics.* 2012;13 1:391.
- 44 903 37. Guo X, Fang Q, Ma C, Zhou B, Wan Y and Jiang R. Whole-genome resequencing of

- 904 Xishuangbanna fighting chicken to identify signatures of selection. *Genetics Selection Evolution*.  
905 2016;48 1:62.
- 906 38. Watterson G. On the number of segregating sites in genetical models without recombination.  
907 *Theoretical population biology*. 1975;7 2:256-76.
- 908 39. Tajima F. Evolutionary relationship of DNA sequences in finite populations. *Genetics*. 1983;105  
909 2:437-60.
- 910 40. Huynh LY, Maney DL and Thomas JW. Contrasting population genetic patterns within the  
911 white-throated sparrow genome (*Zonotrichia albicollis*). *Bmc Genetics*. 2010;11 1:1-10.
- 912 41. Sundström H, Webster MT and Ellegren H. Reduced Variation on the Chicken Z Chromosome.  
913 *Genetics*. 2004;167 1:377.
- 914 42. Ellegren H. The different levels of genetic diversity in sex chromosomes and autosomes. *Trends in*  
915 *Genetics* *Tig*. 2009;25 6:278.
- 916 43. Alexander DH, Novembre J and Lange K. Fast model-based estimation of ancestry in unrelated  
917 individuals. *Genome research*. 2009;19 9:1655-64.
- 918 44. Balakrishnan CN and Edwards SV. Nucleotide variation, linkage disequilibrium and  
919 founder-facilitated speciation in wild populations of the zebra finch (*Taeniopygia guttata*). *Genetics*.  
920 2009;181 2:645-60.
- 921 45. Li M-H and Merilä J. Sex-specific population structure, natural selection, and linkage  
922 disequilibrium in a wild bird population as revealed by genome-wide microsatellite analyses. *BMC*  
923 *Evol Biol*. 2010;10 1:1.
- 924 46. Charlesworth B, Morgan M and Charlesworth D. The effect of deleterious mutations on neutral  
925 molecular variation. *Genetics*. 1993;134 4:1289-303.
- 926 47. Zeng K, Fu Y-X, Shi S and Wu C-I. Statistical tests for detecting positive selection by utilizing  
927 high-frequency variants. *Genetics*. 2006;174 3:1431-9.
- 928 48. Zeng K, Shi S and Wu C-I. Compound tests for the detection of hitchhiking under positive selection.  
929 *Molecular biology and evolution*. 2007;24 8:1898-908.
- 930 49. Ukena K, Ubuka T and Tsutsui K. Distribution of a novel avian gonadotropin-inhibitory hormone in  
931 the quail brain. *Cell and tissue research*. 2003;312 1:73-9.
- 932 50. Andrew A, Rawdon BB and Alison BC. Failure of insulin cells to develop in cultured embryonic  
933 chick pancreas: a model system for the detection of factors supporting insulin cell differentiation. *In*  
934 *Vitro Cellular & Developmental Biology-Animal*. 1994;30 10:664-70.
- 935 51. Kee AJ, Gunning PW and Hardeman EC. Diverse roles of the actin cytoskeleton in striated muscle.  
936 *Journal of muscle research and cell motility*. 2009;30 5-6:187.
- 937 52. Ipek A and Dikmen BY. The relationship between growth traits and egg weight in pheasants (*P.*  
938 *colchicus*). *Journal of Biological and Environmental Sciences*. 2007;1 3.
- 939 53. Xu Y, Zhang X-H and Pang Y-Z. Association of Tyrosinase (TYR) and Tyrosinase-related Protein 1  
940 (TYRP1) with Melanic Plumage Color in Korean Quails (*Coturnix coturnix*). *Asian-Australasian*  
941 *Journal of Animal Sciences*. 2013;26 11:1518-22. doi:10.5713/ajas.2013.13162.
- 942 54. Cui H, Zheng M, Zhao G, Liu R and Wen J. Identification of differentially expressed genes and  
943 pathways for intramuscular fat metabolism between breast and thigh tissues of chickens. *BMC*  
944 *genomics*. 2018;19 1:55.
- 945 55. Shen S-T and Yu JY-L. Cloning and gene expression of a cDNA for the chicken follicle-stimulating  
946 hormone (FSH)- $\beta$ -subunit. *General and comparative endocrinology*. 2002;125 3:375-86.
- 947 56. Wang Y, Fortin J, Lamba P, Bonomi M, Persani L, Roberson MS, et al. Activator protein-1 and

- 948 smad proteins synergistically regulate human follicle-stimulating hormone beta-promoter activity.  
949 *Endocrinology*. 2008;149 11:5577-91. doi:10.1210/en.2008-0220.
- 950 57. Apter D. Development of the hypothalamic-pituitary-ovarian axis. *Ann N Y Acad Sci*.  
951 1997;816:9-21.
- 952 58. Jiang X, Liu H, Chen X, Chen P-H, Fischer D, Sriraman V, et al. Structure of follicle-stimulating  
953 hormone in complex with the entire ectodomain of its receptor. *Proceedings of the National  
954 Academy of Sciences*. 2012;109 31:12491-6.
- 955 59. Suh P-G, Park J-I, Manzoli L, Cocco L, Peak JC, Katan M, et al. Multiple roles of  
956 phosphoinositide-specific phospholipase C isozymes. 2008.
- 957 60. Kiesel L, Przylipiak A, Emig E, Rabe T and Runnebaum B. Stimulation of gonadotropin release by  
958 arachidonic acid and its lipoxygenase metabolites in superfused pituitary cells. *Life Sci*. 1987;40  
959 9:847-51.
- 960 61. Alder JK, Georgantas RW, Hildreth RL, Kaplan IM, Morisot S, Yu X, et al. Kruppel-like factor 4 is  
961 essential for inflammatory monocyte differentiation in vivo. *J Immunol*. 2008;180 8:5645-52.
- 962 62. Luo W-W, Lian H, Zhong B, Shu H-B and Li S. Krüppel-like factor 4 negatively regulates cellular  
963 antiviral immune response. *Cell Mol Immunol*. 2016;13 1:65-72.
- 964 63. Chen G, Wan H, Luo F, Zhang L, Xu Y, Lewkowich I, et al. Foxa2 programs Th2 cell-mediated  
965 innate immunity in the developing lung. *J Immunol*. 2010;184 11:6133-41.
- 966 64. Aki D, Zhang W and Liu YC. The E3 ligase Itch in immune regulation and beyond. *Immunol Rev*.  
967 2015;266 1:6-26.
- 968 65. Daumke O and Knittler MR. Functional asymmetry of the ATP-binding-cassettes of the ABC  
969 transporter TAP is determined by intrinsic properties of the nucleotide binding domains. *Eur J  
970 Biochem*. 2001;268 17:4776-86.
- 971 66. Fulton JE, Thacker EL, Bacon LD and Hunt HD. Functional analysis of avian class I (BFIV)  
972 glycoproteins by epitope tagging and mutagenesis in vitro. *Eur J Immunol*. 1995;25 7:2069-76.
- 973 67. Zhou X and Stephens M. Genome-wide efficient mixed-model analysis for association studies. *Nat  
974 Genet*. 2012;44 7:821-4.
- 975 68. Minvielle F, Cecchi T, Passamonti P, Gourichon D and Renieri C. Plumage colour mutations and  
976 melanins in the feathers of the Japanese quail: a first comparison. *Animal genetics*. 2009;40  
977 6:971-4.
- 978 69. Nishiwaki-Ohkawa T and Yoshimura T. Molecular basis for regulating seasonal reproduction in  
979 vertebrates. *J Endocrinol*. 2016;229 3:R117-27. doi:10.1530/JOE-16-0066.
- 980 70. Wang N, Kimball RT, Braun EL, Liang B and Zhang Z. Assessing phylogenetic relationships  
981 among Galliformes: a multigene phylogeny with expanded taxon sampling in Phasianidae. *PLoS  
982 One*. 2013;8 5:e64312.
- 983 71. Jarvis ED, Mirarab S, Aberer AJ, Li B, Houde P, Li C, et al. Whole-genome analyses resolve early  
984 branches in the tree of life of modern birds. *Science*. 2014;346 6215:1320-31.  
985 doi:10.1126/science.1253451.
- 986 72. Simao FA, Waterhouse RM, Ioannidis P, Kriventseva EV and Zdobnov EM. BUSCO: assessing  
987 genome assembly and annotation completeness with single-copy orthologs. *Bioinformatics*.  
988 2015;31 19:3210-2. doi:10.1093/bioinformatics/btv351.
- 989 73. Tarailo-Graovac M and Chen N. Using RepeatMasker to identify repetitive elements in genomic  
990 sequences. *Current Protocols in Bioinformatics*. 2009;4.10. 1-4.. 4.
- 991 74. Jurka J, Kapitonov VV, Pavlicek A, Klonowski P, Kohany O and Walichiewicz J. Repbase Update, a

- 992 database of eukaryotic repetitive elements. *Cytogenet Genome Res.* 2005;110 1-4:462-7.
- 1 993 75. Xu Z and Wang H. LTR\_FINDER: an efficient tool for the prediction of full-length LTR  
2 retrotransposons. *Nucleic Acids Res.* 2007;35 suppl 2:W265-W8.
- 3 994
- 4 995 76. Benson G. Tandem repeats finder: a program to analyze DNA sequences. *Nucleic Acids Res.*  
5 1999;27 2:573.
- 6 996
- 7 997 77. Aken BL, Ayling S, Barrell D, Clarke L, Curwen V, Fairley S, et al. The Ensembl gene annotation  
8 system. *Database : the journal of biological databases and curation.* 2016;2016  
9 doi:10.1093/database/baw093.
- 10 999
- 11 1000 78. Kent WJ. BLAT--the BLAST-like alignment tool. *Genome research.* 2002;12 4:656-64.  
12 doi:10.1101/gr.229202. Article published online before March 2002.
- 13 1001
- 14 1002 79. Birney E, Clamp M and Durbin R. GeneWise and genomewise. *Genome Res.* 2004;14 5:988-95.
- 15 1003
- 16 1004 80. Stanke M, Keller O, Gunduz I, Hayes A, Waack S and Morgenstern B. AUGUSTUS: ab initio  
17 prediction of alternative transcripts. *Nucleic Acids Res.* 2006;34 suppl 2:W435-W9.
- 18 1005
- 19 1006 81. Burge C and Karlin S. Prediction of complete gene structures in human genomic DNA. *J Mol Biol.*  
20 1997;268 1:78-94.
- 21 1007
- 22 1008 82. Trapnell C, Pachter L and Salzberg SL. TopHat: discovering splice junctions with RNA-Seq.  
23 *Bioinformatics.* 2009;25 9:1105-11.
- 24 1009
- 25 1010 83. Trapnell C, Williams BA, Pertea G, Mortazavi A, Kwan G, Van Baren MJ, et al. Transcript  
26 assembly and quantification by RNA-Seq reveals unannotated transcripts and isoform switching  
27 during cell differentiation. *Nat Biotechnol.* 2010;28 5:511-5.
- 28 1012
- 29 1013 84. Elsik CG, Mackey AJ, Reese JT, Milshina NV, Roos DS and Weinstock GM. Creating a honey bee  
30 consensus gene set. *Genome Biol.* 2007;8 1:1.
- 31 1014
- 32 1015 85. Gilbert, M, P; Li, C; Wang, J; Zhang, G. Genomic data from the domestic pigeon (*Columba livia*).  
33 GigaScience database 2011. <http://dx.doi.org/10.5524/100007>
- 34 1016
- 35 1017 86. Bruford, M, W; Cao, C; Chen, Y; Chen, Y; Dixon, A; Fox, N, et al. Genomic data from the saker  
36 falcon (*Falco cherrug*). GigaScience Database 2014. <http://dx.doi.org/10.5524/100075>
- 37 1018
- 38 1019 87. Bruford, M, W; Cao, C; Chen, Y; Chen, Y; Dixon, A; Fox, N, et al. Genomic data from the  
39 peregrine falcon (*Falco peregrinus*). GigaScience Database 2014. <http://dx.doi.org/10.5524/101006>
- 40 1020
- 41 1021 88. The genome of Darwin's Finch (*Geospiza fortis*). Li, B; Li, H; Parker, P; Wang, J. The genome of  
42 Darwin's Finch (*Geospiza fortis*). GigaScience database 2012. <http://dx.doi.org/10.5524/100040>
- 43 1022
- 44 1023 89. Cai, Q; Cai, Y; Gou, C; Hao, M; He, R; Hui, Y, et al. Genomic data for the Tibetan ground tit  
45 (*Pseudopoces humilis*). GigaScience Database 2014. <http://dx.doi.org/10.5524/100088>
- 46 1024
- 47 1025 90. Ronquist F, Teslenko M, van der Mark P, Ayres DL, Darling A, Höhna S, et al. MrBayes 3.2:  
48 efficient Bayesian phylogenetic inference and model choice across a large model space. *Syst Biol.*  
49 2012;61 3:539-42.
- 50 1026
- 51 1027 91. Guindon S, Delsuc F, Dufayard J-F and Gascuel O. Estimating maximum likelihood phylogenies  
52 with PhyML. *Bioinformatics for DNA sequence analysis.* 2009:113-37.
- 53 1028
- 54 1029 92. Yang Z. PAML: a program package for phylogenetic analysis by maximum likelihood. *CABIOS* 13,  
55 555-556. Supplementary material The following supplementary material is available for this article  
56 online: Fig S. 1997;1.
- 57 1030
- 58 1031
- 59 1032 93. Hedges SB, Dudley J and Kumar S. TimeTree: a public knowledge-base of divergence times among  
60 organisms. *Bioinformatics.* 2006;22 23:2971-2.
- 61 1033
- 62 1034 94. De Bie T, Cristianini N, Demuth JP and Hahn MW. CAFE: a computational tool for the study of  
63 gene family evolution. *Bioinformatics.* 2006;22 10:1269-71.
- 64 1035
- 65

1036 95. Löytynoja A. Phylogeny-aware alignment with PRANK. *Multiple Sequence Alignment Methods*.  
1037 2014:155-70.

1038 96. Talavera G and Castresana J. Improvement of phylogenies after removing divergent and  
1039 ambiguously aligned blocks from protein sequence alignments. *Syst Biol*. 2007;56 4:564-77.

1040 97. Zhao H, Yang J-R, Xu H and Zhang J. Pseudogenization of the umami taste receptor gene *Tas1r1* in  
1041 the giant panda coincided with its dietary switch to bamboo. *Mol Biol Evol*. 2010;27 12:2669-73.

1042 98. Yang Z. PAML 4: phylogenetic analysis by maximum likelihood. *Molecular biology and evolution*.  
1043 2007;24 8:1586-91.

1044 99. Zhang J, Nielsen R and Yang Z. Evaluation of an improved branch-site likelihood method for  
1045 detecting positive selection at the molecular level. *Molecular biology and evolution*. 2005;22  
1046 12:2472-9.

1047 100. Suzuki Y and Nei M. False-positive selection identified by ML-based methods: examples from the  
1048 *Sig1* gene of the diatom *Thalassiosira weissflogii* and the tax gene of a human T-cell lymphotropic  
1049 virus. *Molecular Biology and Evolution*. 2004;21 5:914-21.

1050 101. Li H and Durbin R. Fast and accurate short read alignment with Burrows–Wheeler transform.  
1051 *Bioinformatics*. 2009;25 14:1754-60.

1052 102 Li H, Handsaker B, Wysoker A, Fennell T, Ruan J, Homer N, et al. The sequence alignment/map  
1053 format and SAMtools. *Bioinformatics*. 2009;25 16:2078-9.

1054 103. McKenna A, Hanna M, Banks E, Sivachenko A, Cibulskis K, Kernytsky A, et al. The Genome  
1055 Analysis Toolkit: a MapReduce framework for analyzing next-generation DNA sequencing data.  
1056 *Genome Res*. 2010;20 9:1297-303.

1057 104. Purcell S, Neale B, Todd-Brown K, Thomas L, Ferreira MA, Bender D, et al. PLINK: a tool set  
1058 for whole-genome association and population-based linkage analyses. *Am J Hum Genet*. 2007;81  
1059 3:559-75.

1060 105. Tamura K, Stecher G, Peterson D, Filipowski A and Kumar S. MEGA6: molecular evolutionary  
1061 genetics analysis version 6.0. *Mol Biol Evol*. 2013;30 12:2725-9.

1062 106. Weir BS and Cockerham CC. Estimating F-statistics for the analysis of population structure.  
1063 *evolution*. 1984:1358-70.

1064 107. Barrett JC, Fry B, Maller J and Daly MJ. Haploview: analysis and visualization of LD and  
1065 haplotype maps. *Bioinformatics*. 2005;21 2:263-5.

1066 108. Wu Y, Zhang Y, Hou Z, Fan G, Pi J, Sun S, et al. Supporting data for “Population genomic data  
1067 reveal genes related to important traits of quail”. *GigaScience Database*  
1068 2018. <http://dx.doi.org/10.5524/100441>.

1069

**Table 1 Statistics of SNPs in different genome regions of wild and domesticated quails' subpopulations**

| Region       | Subpopulation | Autosomes  |                 |                      |                   | Chromosome Z |                 |                      |                   |
|--------------|---------------|------------|-----------------|----------------------|-------------------|--------------|-----------------|----------------------|-------------------|
|              |               | # of SNPs  | $\pi (10^{-3})$ | $\theta_w (10^{-3})$ | Tajima's <i>D</i> | # of SNPs    | $\pi (10^{-3})$ | $\theta_w (10^{-3})$ | Tajima's <i>D</i> |
| Exon*        | Wild          | 520,747    | 7.324           | 8.979                | -0.502            | 13,963       | 5.191           | 5.940                | -0.309            |
|              | Egg-type      | 320,629    | 7.206           | 6.449                | 0.256             | 7,201        | 5.448           | 4.479                | 0.425             |
|              | Meat-type     | 282,019    | 7.152           | 6.238                | 0.331             | 6,967        | 5.120           | 4.549                | 0.275             |
| Intron*      | Wild          | 13,632,632 | 11.868          | 14.302               | -0.548            | 555,643      | 8.100           | 9.197                | -0.354            |
|              | Egg-type      | 8,468,826  | 10.735          | 9.668                | 0.270             | 285,930      | 7.934           | 6.483                | 0.489             |
|              | Meat-type     | 7,418,909  | 10.167          | 9.005                | 0.299             | 278,361      | 8.546           | 7.482                | 0.365             |
| All regions* | Wild          | 33,744,246 | 8.679           | 10.709               | -0.763            | 1,438,213    | 5.813           | 6.683                | -0.628            |
|              | Egg-type      | 20,848,043 | 7.338           | 6.617                | 0.467             | 749,670      | 4.031           | 3.389                | 0.666             |
|              | Meat-type     | 18,250,531 | 6.901           | 6.052                | 0.600             | 716,433      | 3.843           | 3.328                | 0.593             |

\* all regions refers to the total genome regions; Exon and Intron refer to exon and intron regions respectively.

Figure 1

[Click here to download Figure Figure. 1-updated.pdf](#)

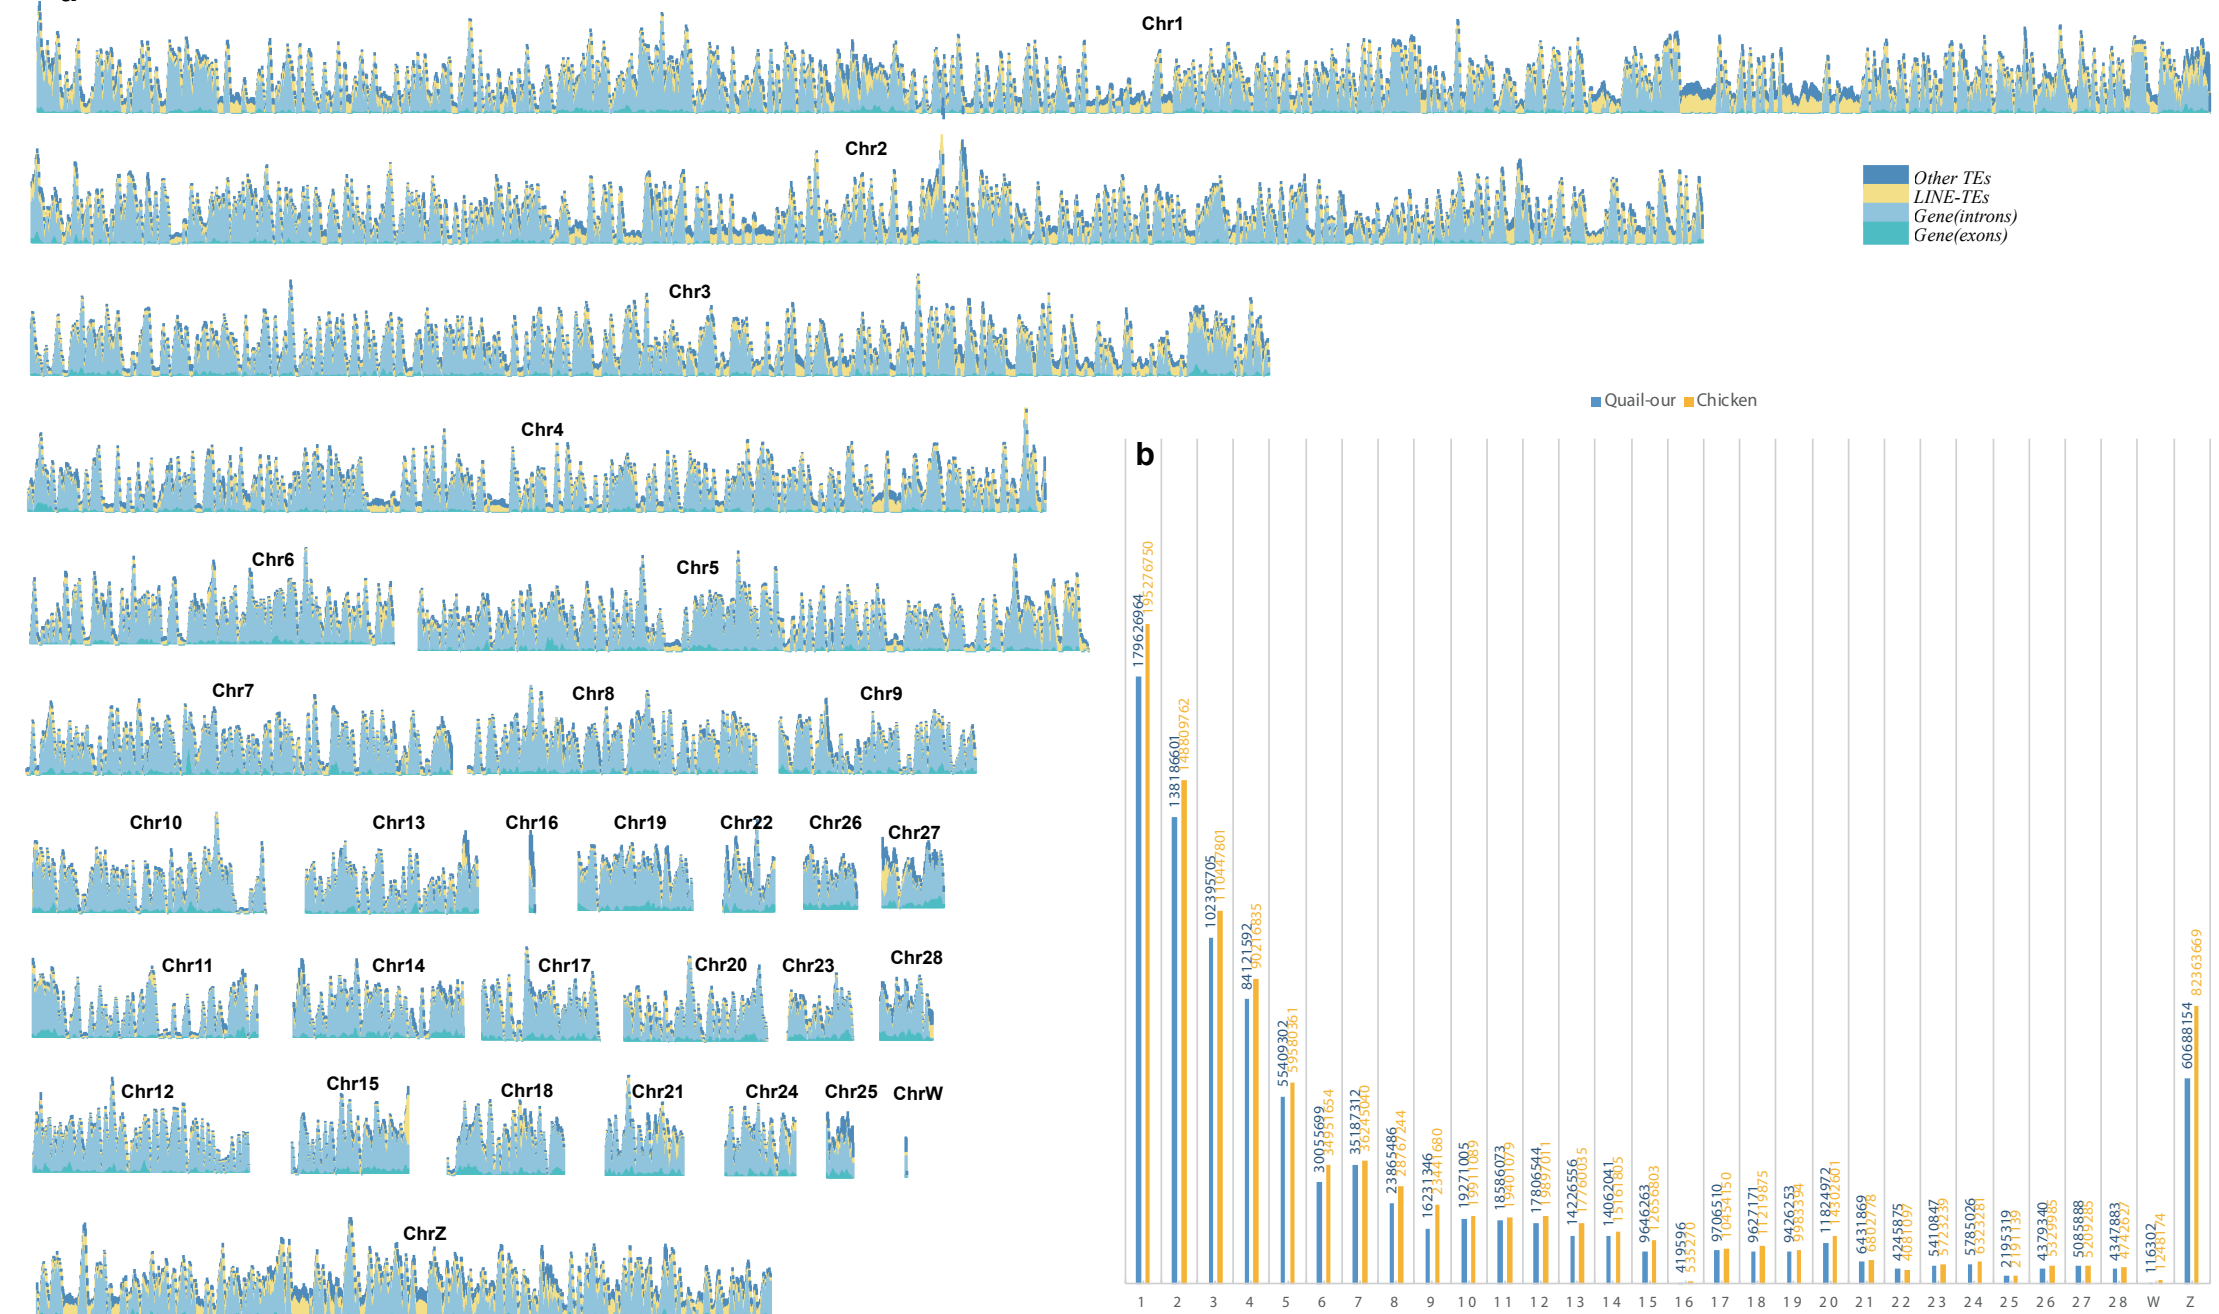



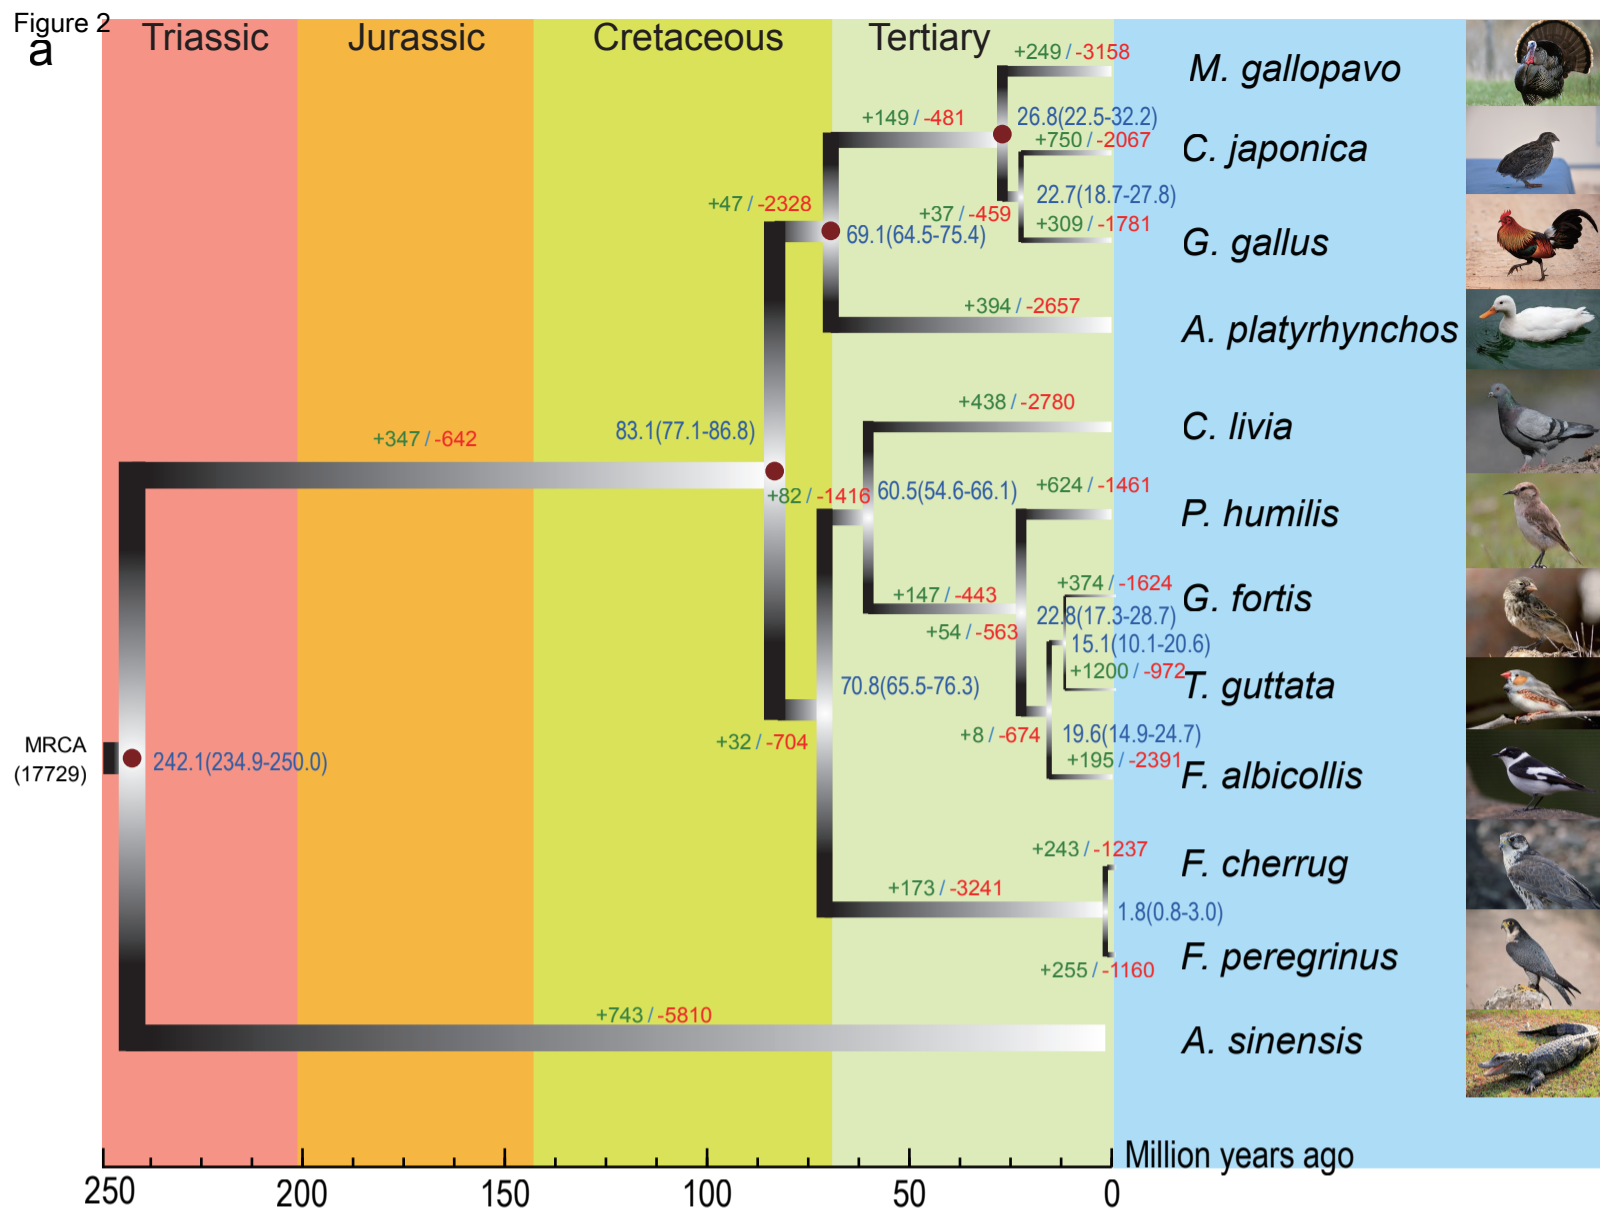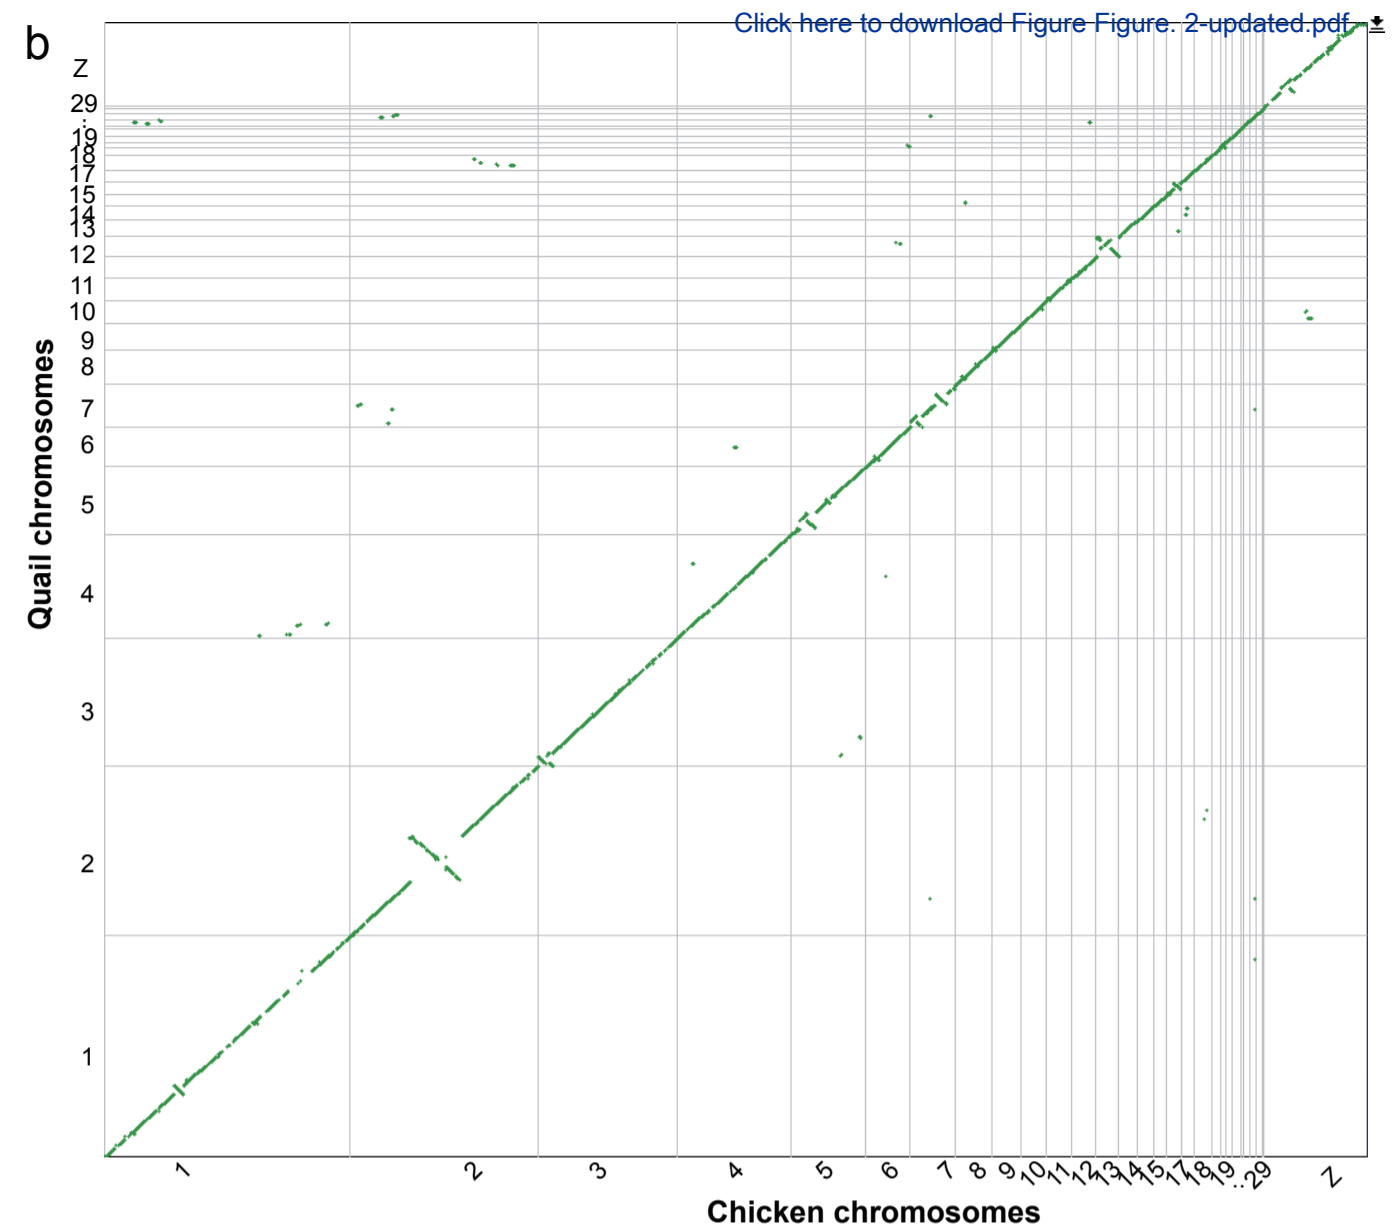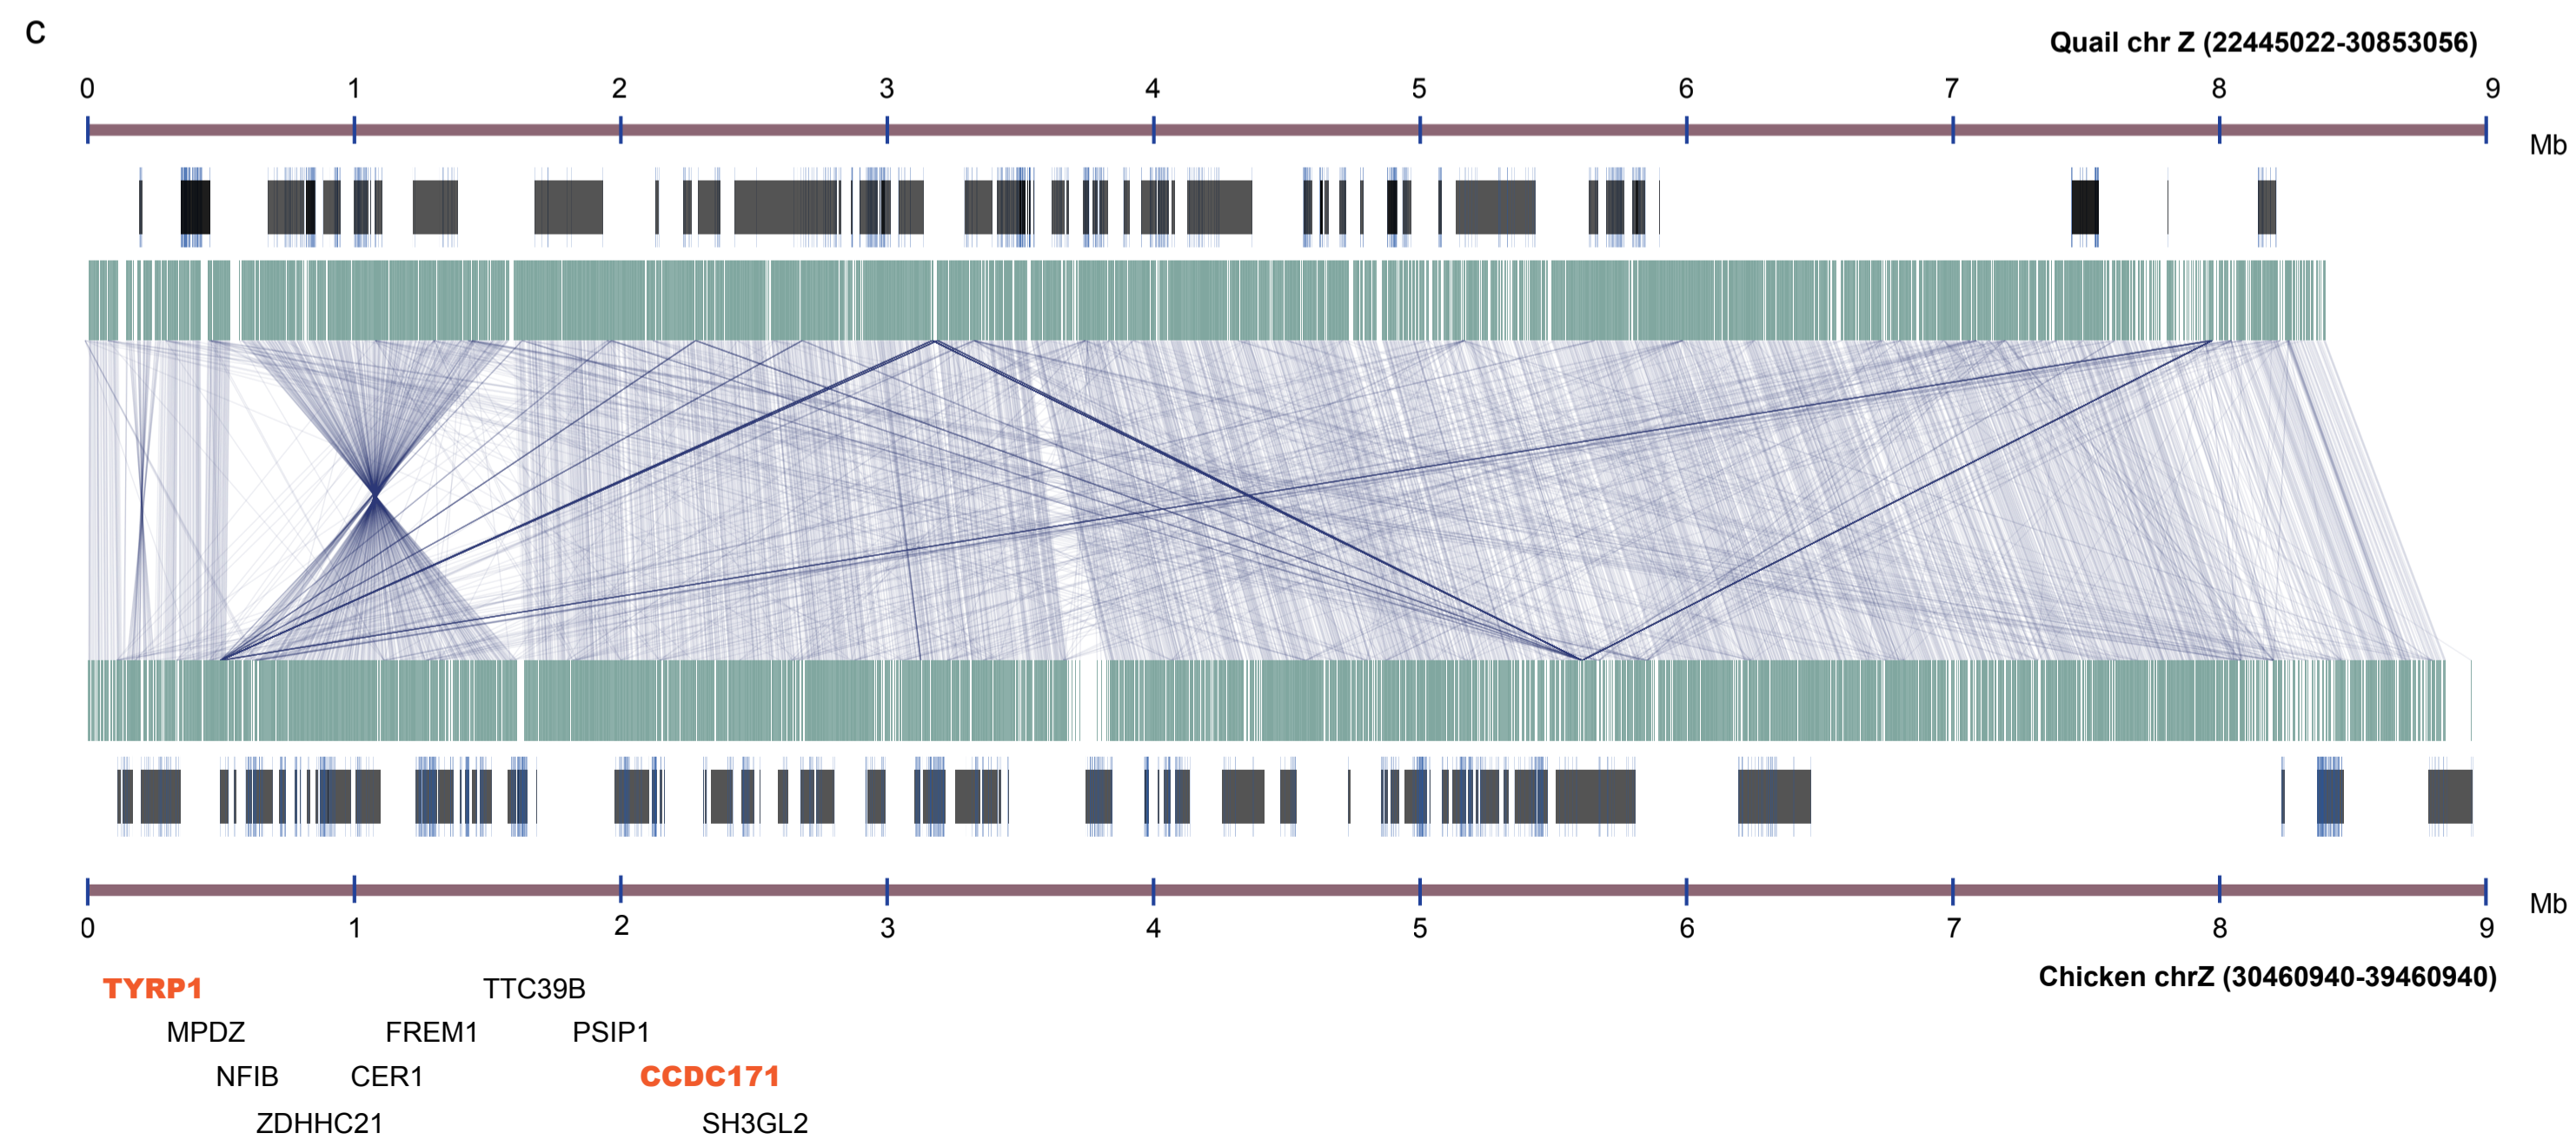

Figure 3

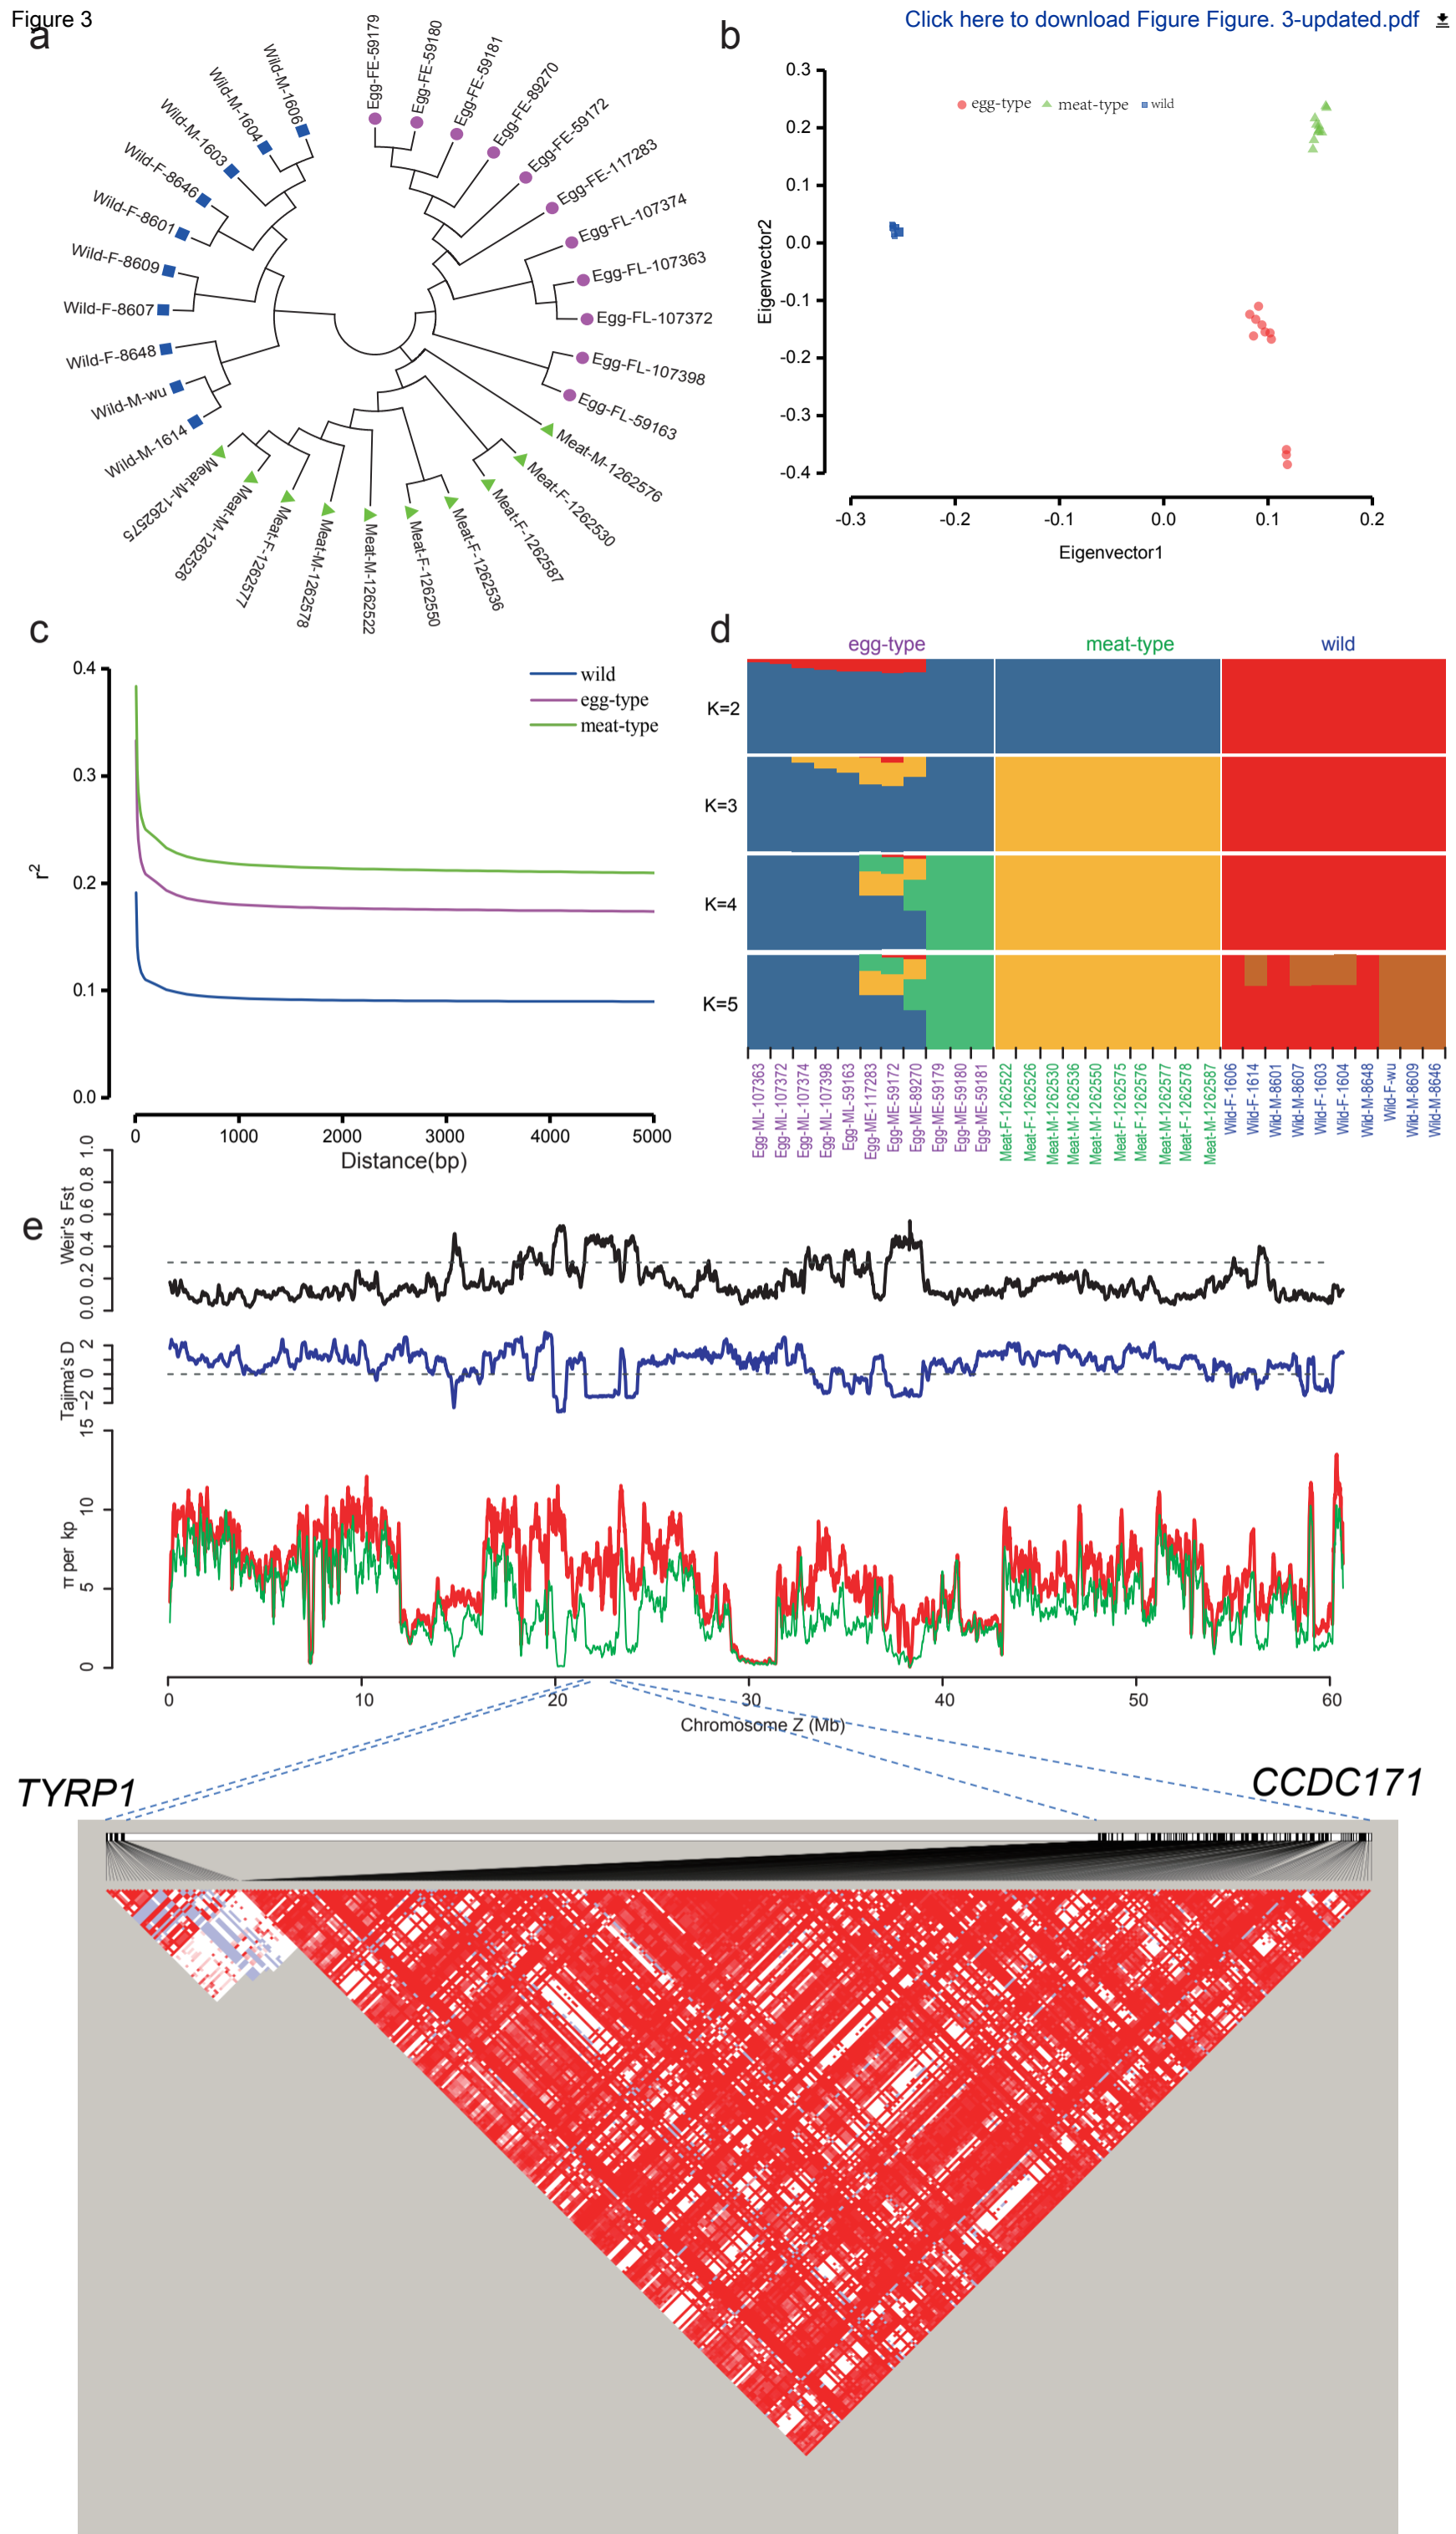



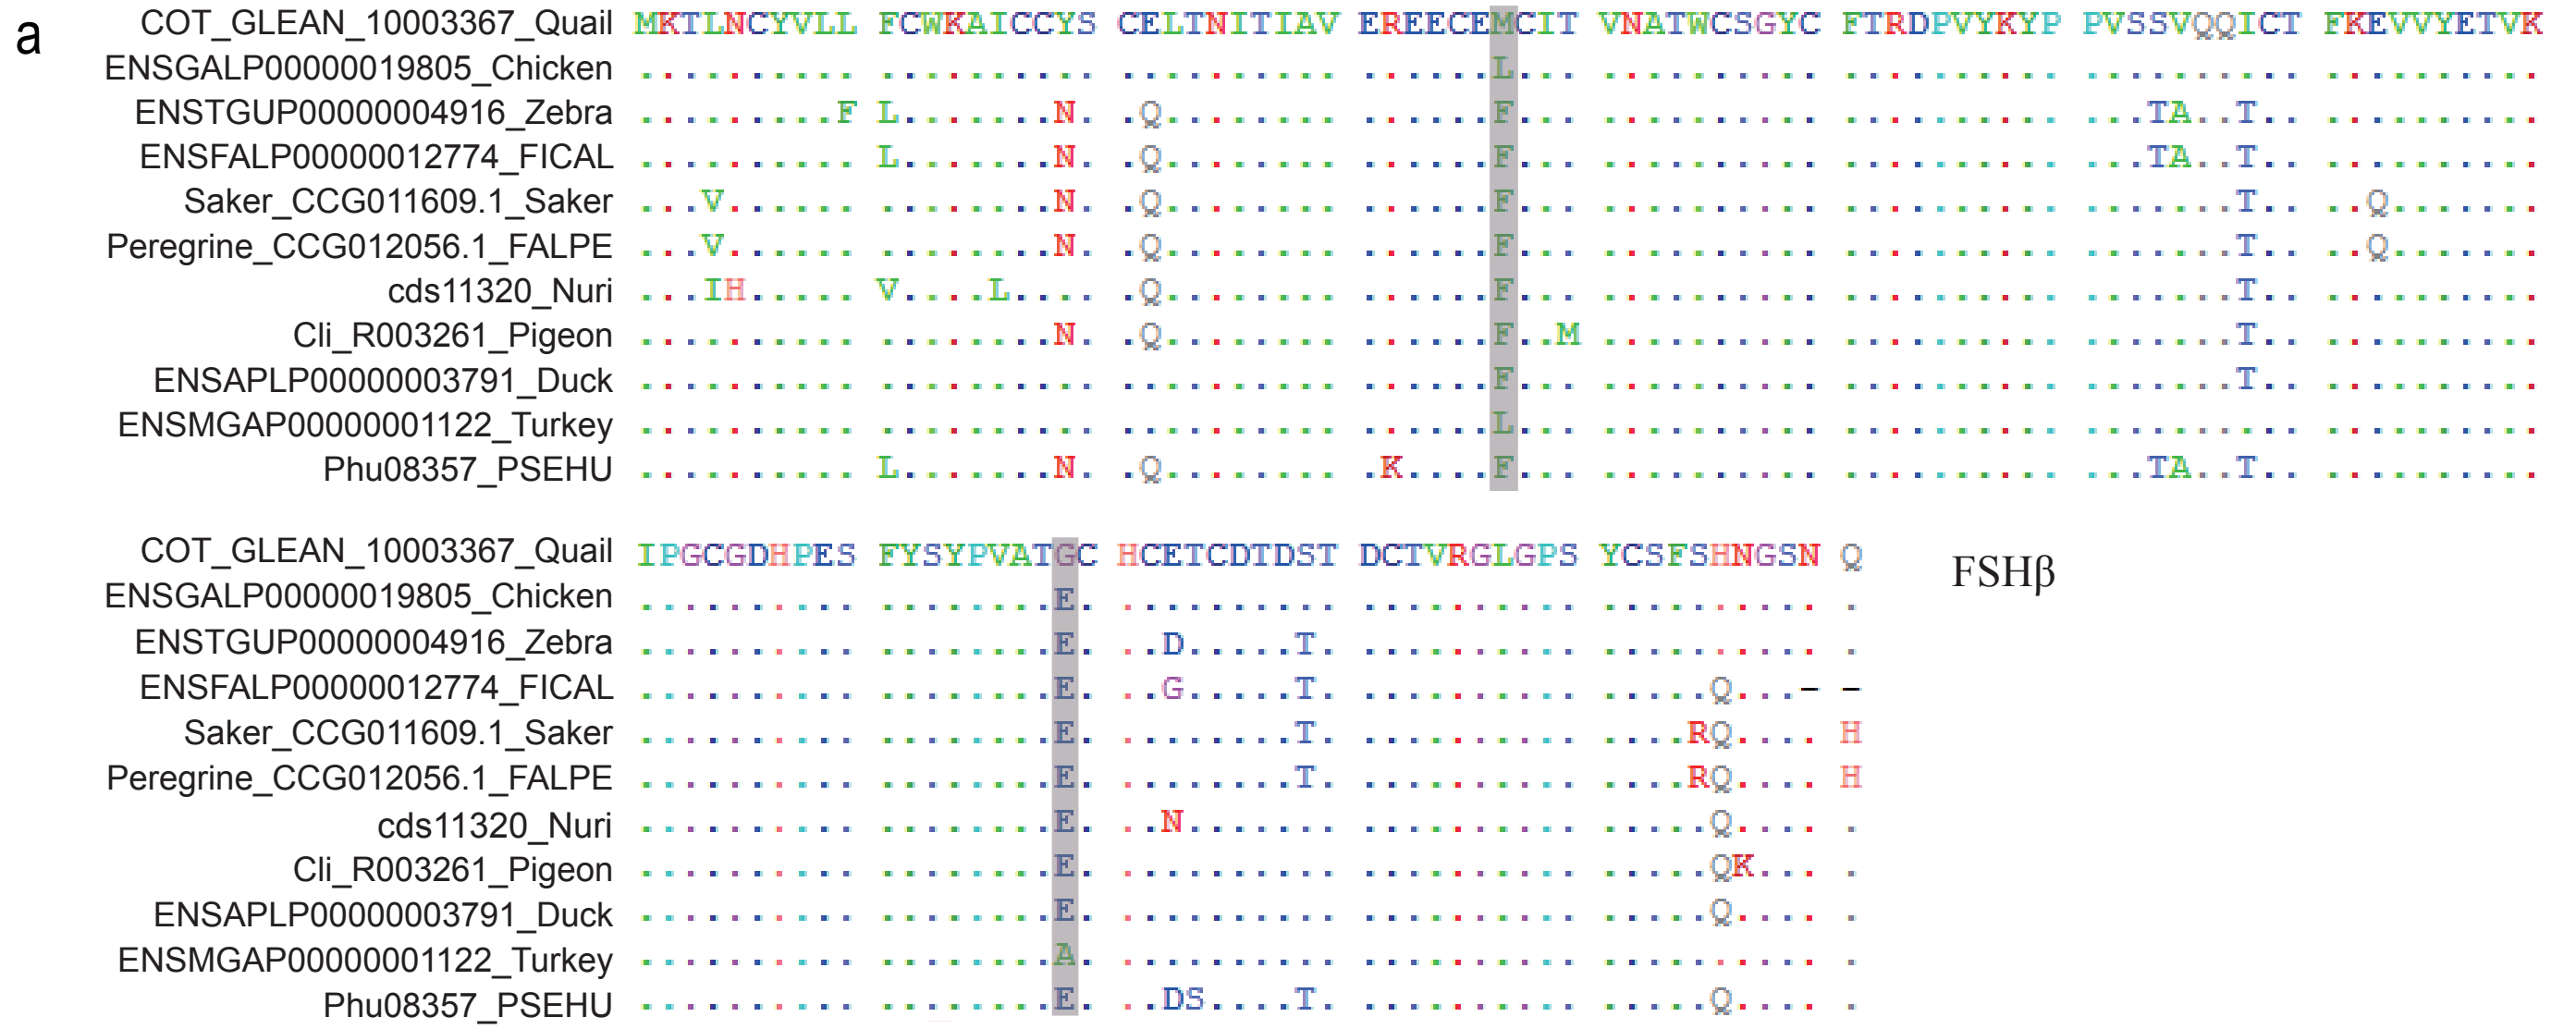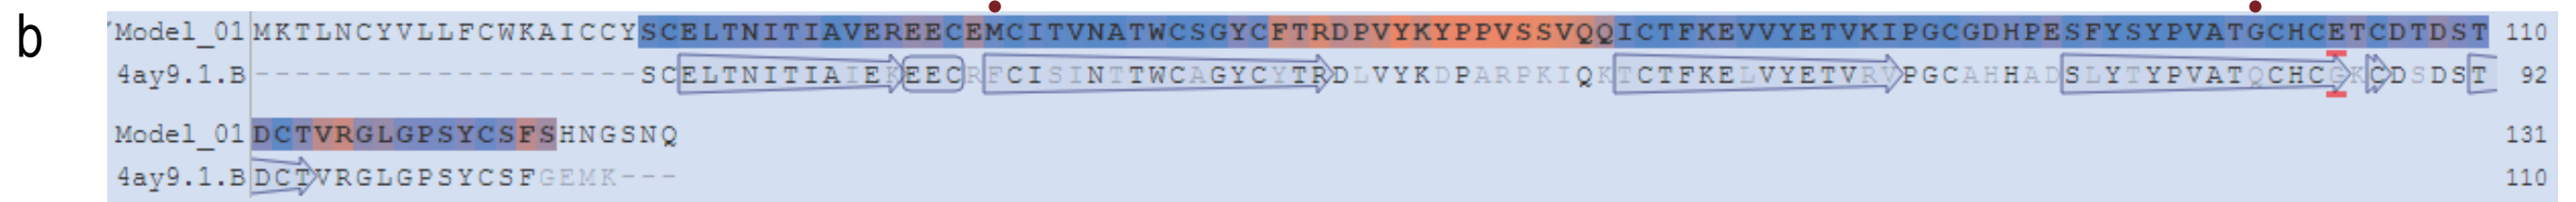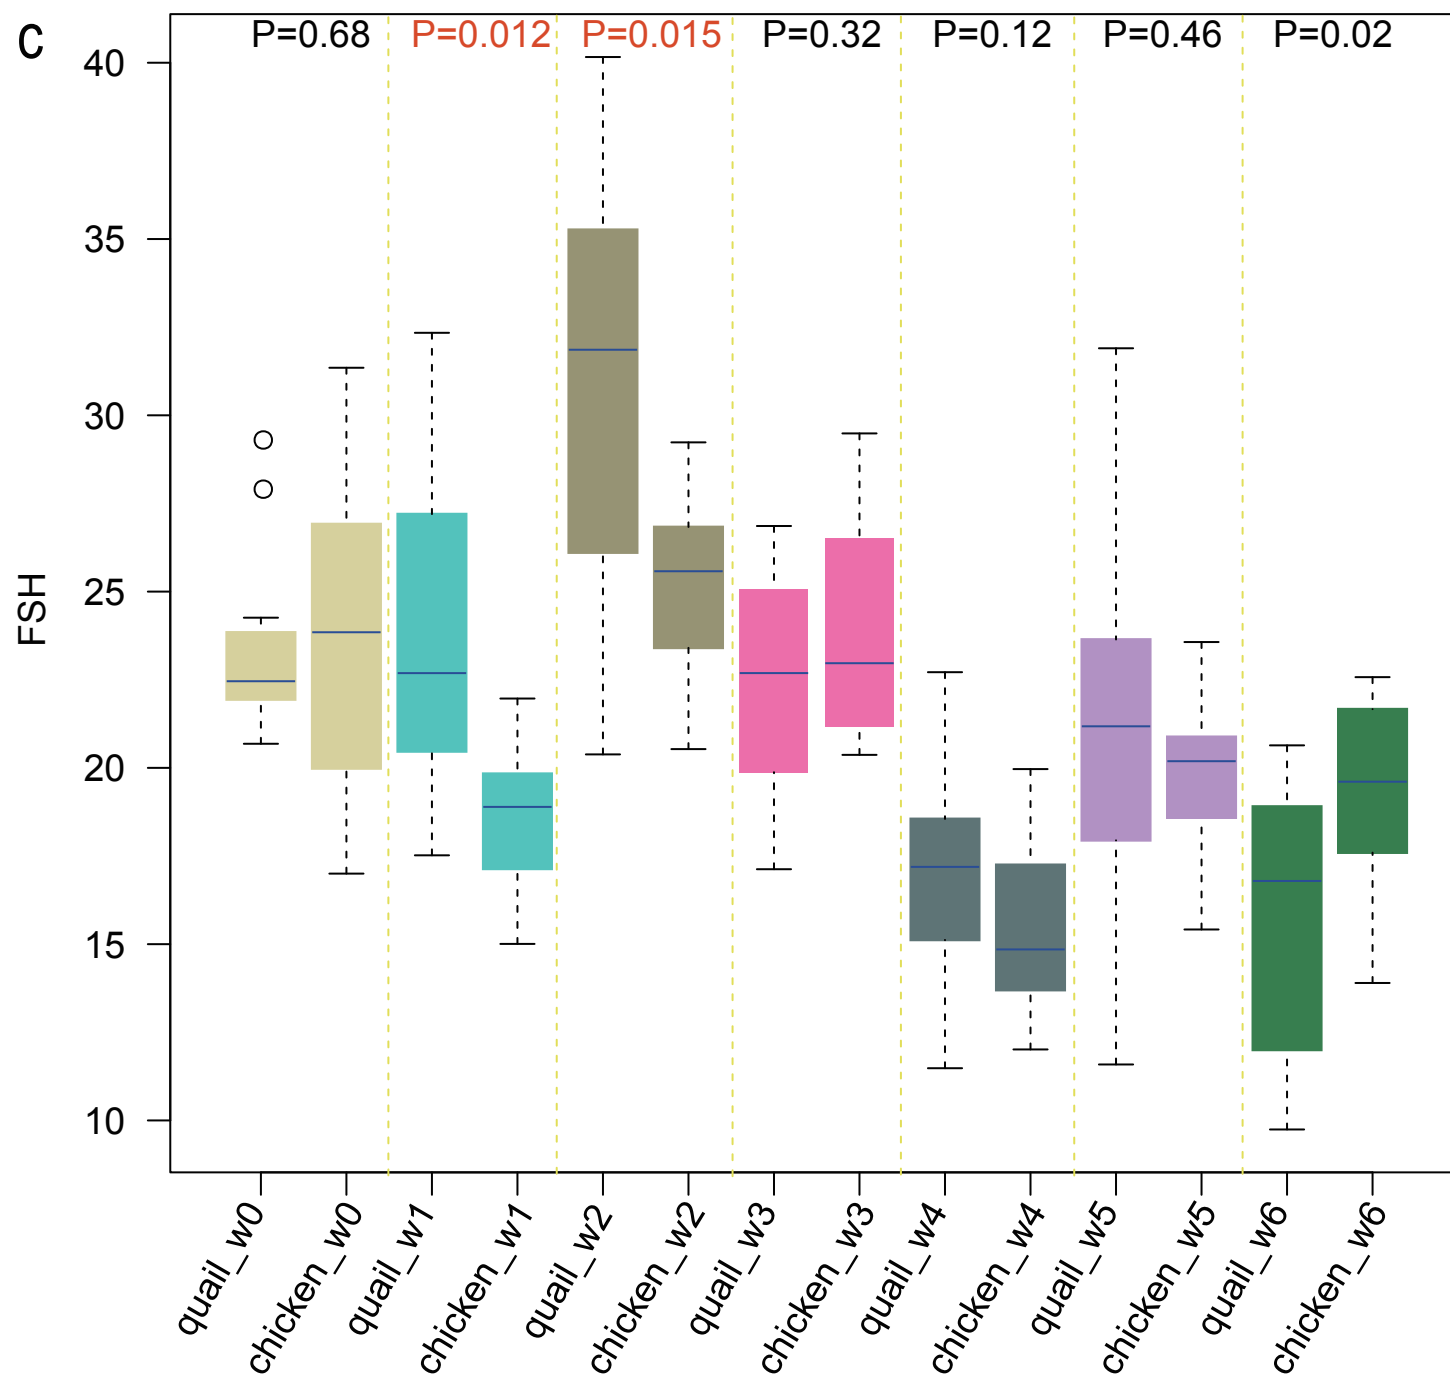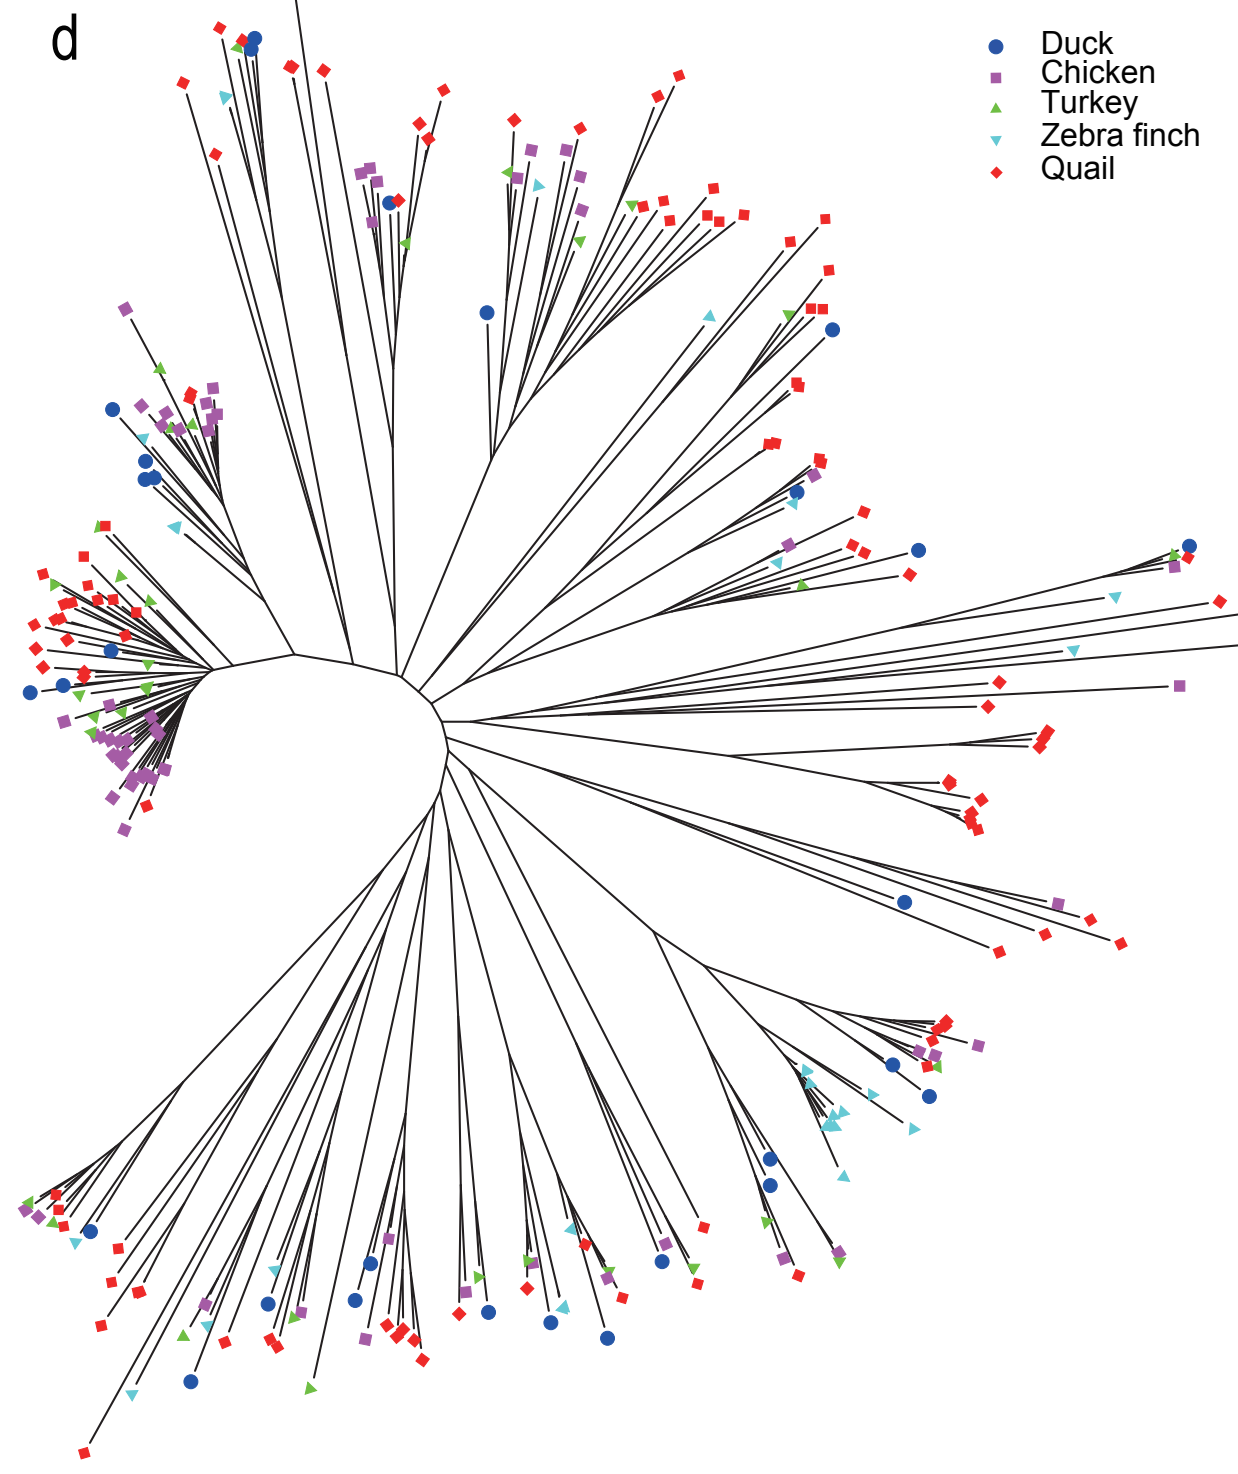

Figure 5  
a

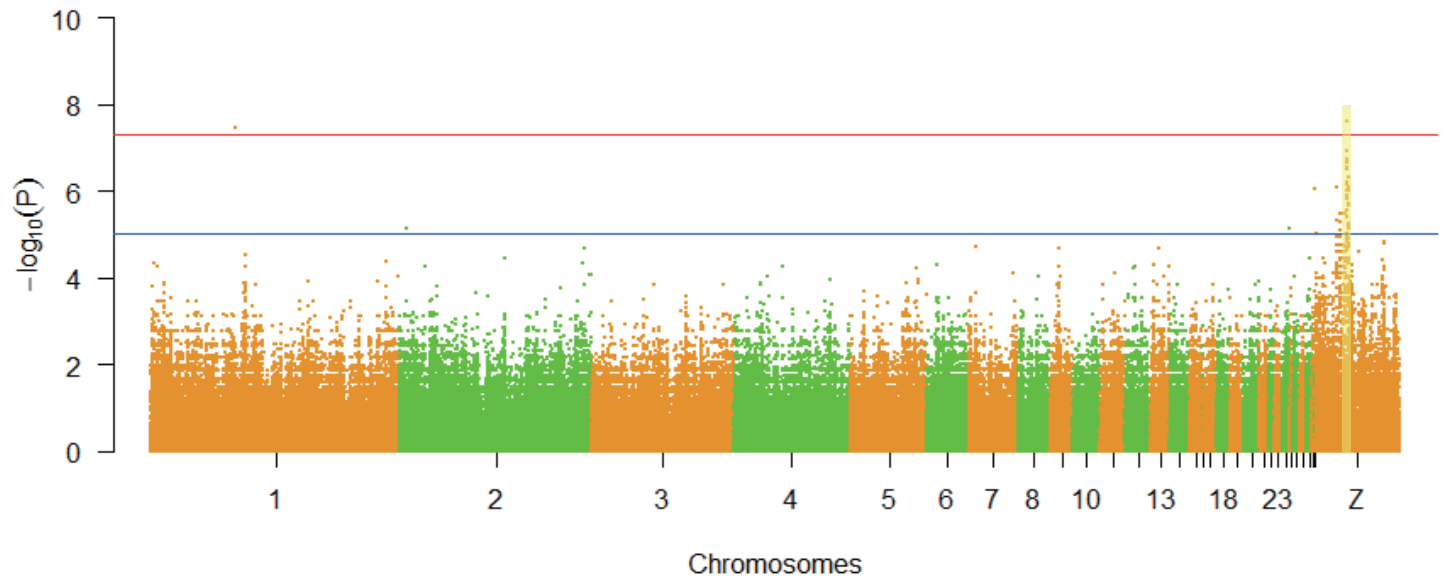

b

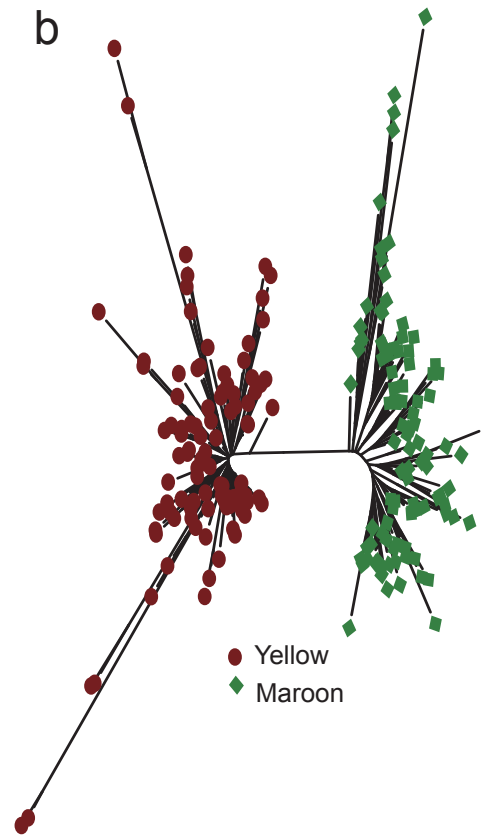

c

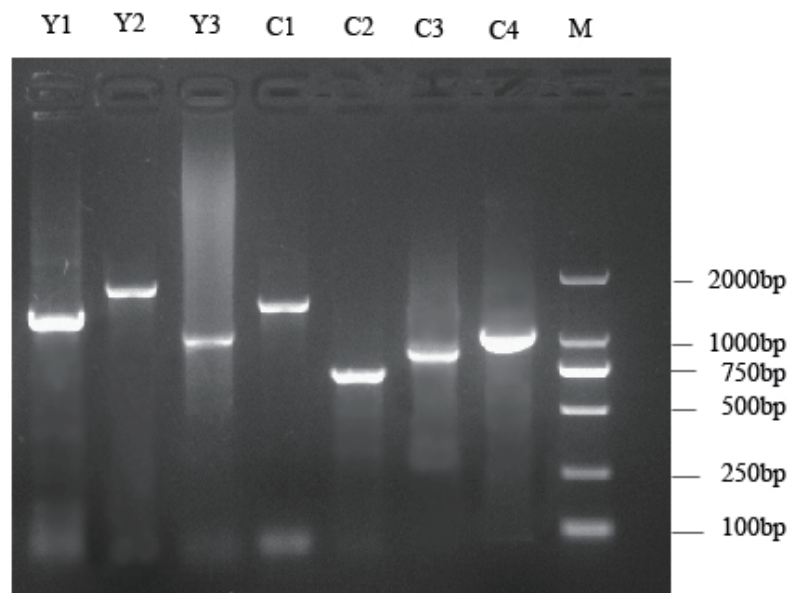

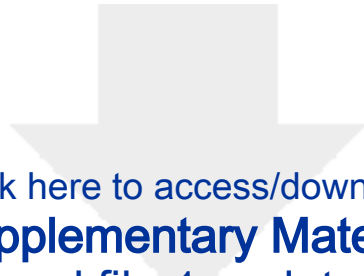

Click here to access/download  
**Supplementary Material**  
Additional file 1-updated.docx

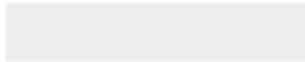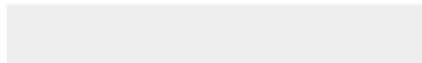

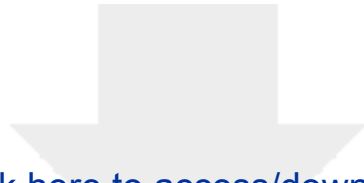

[Click here to access/download](#)

**Supplementary Material**

Table S13 diversity statistics of 31 quails-updated.xlsx

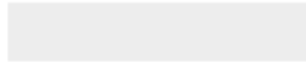

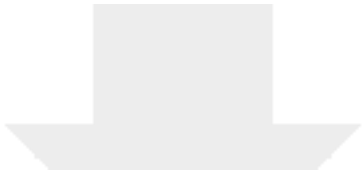

Click here to access/download  
**Supplementary Material**  
Table S14-updated.xlsx



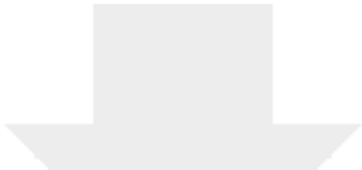

Click here to access/download  
**Supplementary Material**  
Table.S15-updated.xls





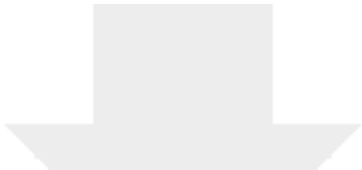

Click here to access/download  
**Supplementary Material**  
Table S16-updated.xlsx



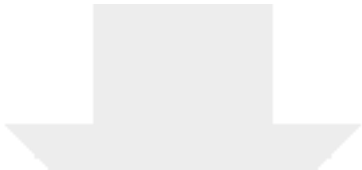

Click here to access/download  
**Supplementary Material**  
Table.S17-updated.xls



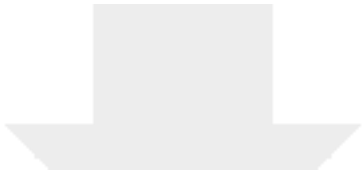

Click here to access/download  
**Supplementary Material**  
Table S19-updated.xlsx



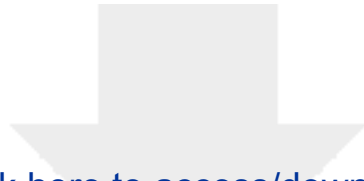

Click here to access/download  
**Supplementary Material**  
Respond to Reviewers.docx

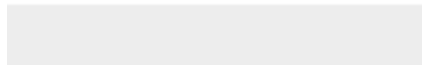

Supplement: giy049_giga-d-17-00216_revision_1.pdf [file giy049_giga-d-17-00216_revision_1.pdf]
